# Supplementary material
Source: publisher figshare collection journal article supplement (https://gsapubs.figshare.com/ndownloader/files/22411821)
Supplement: Supplementary file 1 [file 22411821]

Archive with 4 entries (4 files):
- Supplemental Material 1.xlsx
- Supplemental Material 2.xlsx
- Supplemental Material 3.pdf
- Supplemental Material 4.xlsx
