# Supplementary material
Source: publisher figshare collection journal article supplement (https://gsapubs.figshare.com/ndownloader/files/22411821)
Supplement: Supplementary file 1 [file 22411821 › Supplemental Material 1.xlsx]

## Sheet: Table S1
Supplimental Table 1: U-Pb Geochronological results for modern river sand samples of Ecuador.
							Isotope ratios					Apparent ages (Ma)
ID	Analysis	U	206Pb	U/Th	206Pb*	Error	207Pb*	Error	206Pb*	Error	Error	206Pb*	1σ error	207Pb*	1σ error	206Pb*	1σ error	Best age	1σ error
		(ppm)	204Pb		207Pb*	(%)	235U*	(%)	238U	(%)	corr.	238U*	(Ma)	235U	(Ma)	207Pb*	(Ma)	(Ma)	(Ma)
1	EC1610
	EC1610_Spot 81	249.899	20000	1.8301	1.50717	50	0.00119701	760.491	1.30903e-05	758.846	0.997836	0.0843846	0.640345	1.21469	9.23237	NA	NA	0.0843846	0.640345
	EC1610_Spot 32	331.246	20000	2.62795	1.49895	50	0.00130555	1107.81	1.41993e-05	1106.68	0.998981	0.0915341	1.01298	1.32477	14.6674	NA	NA	0.0915341	1.01298
	EC1610_Spot 95	164.684	20000	2.61466	1.50948	50	0.00131742	58.3095	1.44291e-05	30	0.514496	0.0930152	0.0279044	1.3368	0.778971	NA	NA	0.0930152	0.0279044
	EC1610_Spot 86	234.636	20000	2.77145	1.50771	41.0204	0.00133513	50.82	1.46059e-05	30	0.590319	0.0941548	0.0282462	1.35476	0.688032	NA	NA	0.0941548	0.0282462
	EC1610_Spot 16	194.049	20000	3.14631	1.50038	40.2941	0.00135805	50.2356	1.47845e-05	30	0.597186	0.095306	0.0285916	1.37801	0.691782	NA	NA	0.095306	0.0285916
	EC1610_Spot 11	83.0013	20000	3.04303	1.499	50	0.00139468	637.604	1.51693e-05	635.64	0.996921	0.0977866	0.621567	1.41515	9.01702	NA	NA	0.0977866	0.621567
	EC1610_Spot 77	121.834	20000	3.22356	1.50508	50	0.00140873	58.3095	1.53841e-05	30	0.514496	0.0991718	0.0297513	1.42939	0.832884	NA	NA	0.0991718	0.0297513
	EC1610_Spot 101	187.414	20000	3.07415	1.50858	19.5983	0.00141589	35.8343	1.54983e-05	30	0.837187	0.0999077	0.0299721	1.43665	0.51445	NA	NA	0.0999077	0.0299721
	EC1610_Spot 118	204.285	20000	3.79934	1.50897	50	0.00141889	58.3095	1.55352e-05	30	0.514496	0.100145	0.0300434	1.43969	0.838884	NA	NA	0.100145	0.0300434
	EC1610_Spot 63	142.843	20000	2.91951	1.50174	50	0.00142892	247.877	1.557e-05	242.782	0.979445	0.10037	0.243678	1.44986	3.59133	NA	NA	0.10037	0.243678
	EC1610_Spot 73	162.505	20000	2.98992	1.50456	50	0.00142739	58.3095	1.55827e-05	30	0.514496	0.100451	0.0301352	1.44832	0.843904	NA	NA	0.100451	0.0301352
	EC1610_Spot 2	450.722	20000	1.69613	2.0439	50	0.00106141	58.3095	1.57409e-05	30	0.514496	0.101472	0.0304413	1.07716	0.627757	4209.18	NA	0.101472	0.0304413
	EC1610_Spot 41	130.927	20000	2.74938	4.36421	22.4965	0.000501792	37.4979	1.58897e-05	30	0.800045	0.102431	0.0307291	0.509383	0.19096	3046.01	365.563	0.102431	0.0307291
	EC1610_Spot 15	196.968	20000	3.04112	1.499	50	0.00146607	58.3095	1.59457e-05	30	0.514496	0.102792	0.0308374	1.48754	0.866741	NA	NA	0.102792	0.0308374
	EC1610_Spot 120	109.561	20000	3.04302	1.50641	50	0.00146097	281.935	1.59688e-05	277.466	0.984149	0.102941	0.285624	1.48236	4.17628	NA	NA	0.102941	0.285624
	EC1610_Spot 75	219.601	20000	2.16674	1.50573	50	0.00146932	58.3095	1.60528e-05	30	0.514496	0.103482	0.0310445	1.49083	0.868657	NA	NA	0.103482	0.0310445
	EC1610_Spot 82	113.892	108094	3.50307	1.50688	50	0.00147147	58.3095	1.60887e-05	30	0.514496	0.103713	0.0311137	1.49301	0.869928	NA	NA	0.103713	0.0311137
	EC1610_Spot 43	302.572	20000	2.6481	1.49767	50	0.00148855	58.3095	1.61759e-05	30	0.514496	0.104276	0.0312825	1.51033	0.88001	NA	NA	0.104276	0.0312825
	EC1610_Spot 19	24.3225	20000	3.49025	1.50038	50	0.00149657	58.3095	1.62924e-05	30	0.514496	0.105027	0.0315077	1.51845	0.884741	NA	NA	0.105027	0.0315077
	EC1610_Spot 26	264.117	20000	2.13099	1.49835	50	0.00152254	58.3095	1.65528e-05	30	0.514496	0.106705	0.0320113	1.54479	0.900073	NA	NA	0.106705	0.0320113
	EC1610_Spot 94	392.824	20000	1.65281	1.85698	50	0.00123257	55.4487	1.66075e-05	23.9699	0.43229	0.107058	0.0256615	1.25076	0.693102	4350.23	NA	0.107058	0.0256615
	EC1610_Spot 91	134.767	20000	3.04803	1.50837	46.1718	0.00153994	55.0621	1.68539e-05	30	0.544839	0.108646	0.0325935	1.56242	0.859643	NA	NA	0.108646	0.0325935
	EC1610_Spot 116	187.628	240921	1.96704	3.68265	10.755	0.000631044	31.8696	1.68619e-05	30	0.941337	0.108698	0.0326091	0.640549	0.204076	3314.96	169.104	0.108698	0.0326091
	EC1610_Spot 80	175.672	20000	2.83623	1.5054	50	0.00156572	58.3095	1.71023e-05	30	0.514496	0.110248	0.0330741	1.58857	0.925561	NA	NA	0.110248	0.0330741
	EC1610_Spot 90	263.825	20000	1.8032	1.50792	13.7783	0.00158573	33.0128	1.73499e-05	30	0.90874	0.111843	0.0335527	1.60885	0.530704	NA	NA	0.111843	0.0335527
	EC1610_Spot 88	306.279	20000	1.87401	2.92456	39.0697	0.000824656	49.259	1.74993e-05	30	0.609026	0.112807	0.0338418	0.836997	0.412126	3671.42	1579.18	0.112807	0.0338418
	EC1610_Spot 106	190.859	20000	2.82053	1.51021	50	0.00163384	58.3095	1.79034e-05	30	0.514496	0.115411	0.0346231	1.65762	0.96576	NA	NA	0.115411	0.0346231
	EC1610_Spot 117	129.734	20000	3.69579	1.50897	50	0.00164796	58.3095	1.80433e-05	30	0.514496	0.116313	0.0348937	1.67194	0.974096	NA	NA	0.116313	0.0348937
	EC1610_Spot 55	281.111	20000	2.17817	1.49877	17.9214	0.00170507	34.9453	1.85423e-05	30	0.858483	0.11953	0.0358587	1.72982	0.603978	NA	NA	0.11953	0.0358587
	EC1610_Spot 85	254.312	20000	2.57311	3.52053	27.4515	0.000732412	40.6643	1.8709e-05	30	0.737748	0.120605	0.0361812	0.743406	0.30219	3385.32	437.676	0.120605	0.0361812
	EC1610_Spot 17	253.524	20000	2.78378	1.50038	27.4778	0.00171873	40.682	1.87109e-05	30	0.737426	0.120617	0.0361848	1.74367	0.708752	NA	NA	0.120617	0.0361848
	EC1610_Spot 21	57.8802	20000	2.63306	1.49882	50	0.00173238	58.3095	1.884e-05	30	0.514496	0.121449	0.0364345	1.75751	1.02391	NA	NA	0.121449	0.0364345
	EC1610_Spot 18	210.579	20000	2.77114	1.50038	34.0576	0.00176181	45.3863	1.91799e-05	30	0.660992	0.123641	0.0370918	1.78734	0.810493	NA	NA	0.123641	0.0370918
	EC1610_Spot 105	152.888	20000	3.61295	1.51021	50	0.00177757	58.3095	1.94783e-05	30	0.514496	0.125564	0.0376689	1.80331	1.05057	NA	NA	0.125564	0.0376689
	EC1610_Spot 109	61.3417	20000	3.0406	1.50994	48.2354	0.00178229	56.8036	1.95266e-05	30	0.528135	0.125875	0.0377622	1.8081	1.02615	NA	NA	0.125875	0.0377622
	EC1610_Spot 114	154.022	20000	3.25014	1.51037	50	0.00179873	70.8506	1.97122e-05	50.1977	0.7085	0.127072	0.0637865	1.82475	1.29169	NA	NA	0.127072	0.0637865
	EC1610_Spot 33	168.05	20000	2.9623	1.49895	48.5718	0.00183331	57.0896	1.99392e-05	30	0.52549	0.128535	0.0385602	1.8598	1.06078	NA	NA	0.128535	0.0385602
	EC1610_Spot 113	148.213	20000	2.09537	1.51037	50	0.00182154	58.3095	1.99622e-05	30	0.514496	0.128683	0.0386046	1.84787	1.07651	NA	NA	0.128683	0.0386046
	EC1610_Spot 39	48.3449	20000	2.08413	1.49791	19.9267	0.00184316	36.0149	2.00326e-05	30	0.832988	0.129137	0.0387408	1.86979	0.672785	NA	NA	0.129137	0.0387408
	EC1610_Spot 70	215.564	20000	2.18459	1.50375	50	0.00184562	58.3095	2.01375e-05	30	0.514496	0.129813	0.0389436	1.87228	1.09071	NA	NA	0.129813	0.0389436
	EC1610_Spot 58	296.654	20000	3.57821	1.5014	50	0.00188312	58.3095	2.05145e-05	30	0.514496	0.132244	0.0396727	1.91029	1.11283	NA	NA	0.132244	0.0396727
	EC1610_Spot 68	355.556	20000	1.91852	4.85146	30.144	0.000585079	35.3418	2.05956e-05	18.4494	0.522028	0.132766	0.0244944	0.593906	0.209836	2875.3	503.044	0.132766	0.0244944
	EC1610_Spot 78	246.724	20000	3.13747	5.89831	7.14441	0.000486939	27.2439	2.08396e-05	26.2904	0.965003	0.134339	0.035318	0.494309	0.134636	2553.09	119.802	0.134339	0.035318
	EC1610_Spot 24	23.832	20000	4.14102	1.49882	50	0.00192493	58.3095	2.09341e-05	30	0.514496	0.134948	0.0404841	1.95267	1.1375	NA	NA	0.134948	0.0404841
	EC1610_Spot 34	238.675	20000	2.17734	4.69019	15.1667	0.000615694	29.8543	2.09528e-05	25.7148	0.861342	0.135069	0.0347324	0.624972	0.186524	2930.1	246.886	0.135069	0.0347324
	EC1610_Spot 36	109.305	20000	3.66409	1.49791	25.3078	0.00195521	39.249	2.12505e-05	30	0.764351	0.136988	0.0410959	1.98335	0.777686	NA	NA	0.136988	0.0410959
	EC1610_Spot 52	170.869	20000	2.11361	1.49808	44.6188	0.00195768	53.7665	2.12797e-05	30	0.557968	0.137176	0.0411524	1.98585	1.06668	NA	NA	0.137176	0.0411524
	EC1610_Spot 100	235.197	20000	2.79506	3.30769	19.2756	0.000892055	27.9103	2.14094e-05	20.1851	0.723212	0.138013	0.0278576	0.905374	0.25258	3482.17	301.616	0.138013	0.0278576
	EC1610_Spot 98	319.82	20000	1.57761	2.22943	19.7231	0.00134463	26.697	2.17512e-05	17.9924	0.673949	0.140216	0.0252279	1.36439	0.364007	4080.4	1905.17	0.140216	0.0252279
	EC1610_Spot 48	151.084	20000	3.65792	1.49898	19.502	0.00202858	38.2764	2.20636e-05	32.9357	0.860469	0.142229	0.0468437	2.0577	0.786818	NA	NA	0.142229	0.0468437
	EC1610_Spot 99	158.751	20000	2.74719	4.5765	17.0739	0.000677986	34.5184	2.25134e-05	30	0.869102	0.145129	0.0435383	0.688182	0.237469	2969.72	277.479	0.145129	0.0435383
	EC1610_Spot 69	230.86	20000	2.31121	2.42048	14.9737	0.00128586	28.9958	2.25831e-05	24.8304	0.856342	0.145578	0.0361472	1.3048	0.378096	3957.6	225.965	0.145578	0.0361472
	EC1610_Spot 79	303.665	20000	1.87245	1.50574	50	0.00208176	53.1304	2.27442e-05	17.9678	0.338183	0.146617	0.0263435	2.11159	1.12073	NA	NA	0.146617	0.0263435
	EC1610_Spot 110	246.614	20000	2.93169	2.96665	47.9207	0.00106074	53.0012	2.28331e-05	22.6436	0.427228	0.14719	0.0333286	1.07649	0.570251	3649.59	1518.6	0.14719	0.0333286
	EC1610_Spot 35	209.801	20000	3.12994	1.49895	50	0.0021169	57.4213	2.30236e-05	28.2349	0.491714	0.148418	0.0419052	2.14719	1.23164	NA	NA	0.148418	0.0419052
	EC1610_Spot 103	29.5993	20000	2.75189	1.50972	50	0.00214278	173.059	2.34727e-05	165.679	0.957354	0.151313	0.25069	2.17342	3.7573	NA	NA	0.151313	0.25069
	EC1610_Spot 92	175.169	20000	3.18047	1.50837	50	0.00224263	56.0374	2.45445e-05	25.3019	0.451518	0.158222	0.0400327	2.27458	1.27319	NA	NA	0.158222	0.0400327
	EC1610_Spot 30	167.639	20000	3.30645	1.78384	13.2536	0.00195365	26.8972	2.52866e-05	23.4051	0.87017	0.163006	0.0381513	1.98177	0.532522	NA	NA	0.163006	0.0381513
	EC1610_Spot 83	100.487	20000	4.1554	9.18063	9.41705	0.000382388	31.4433	2.54721e-05	30	0.954099	0.164202	0.0492599	0.388197	0.122038	1781.5	172.112	0.164202	0.0492599
	EC1610_Spot 76	84.9339	20000	2.81004	1.50508	29.9026	0.00236477	42.3576	2.58248e-05	30	0.708256	0.166475	0.0499418	2.39831	1.01467	NA	NA	0.166475	0.0499418
	EC1610_Spot 45	124.035	20000	3.52036	25.7213	0.413746	0.000138847	30.0029	2.5913e-05	30	0.999905	0.167043	0.0501124	0.140973	0.042293	NA	NA	0.167043	0.0501124
	EC1610_Spot 8	81.6184	20000	3.15042	1.4986	25.0732	0.00238807	39.0982	2.59669e-05	30	0.767299	0.167391	0.0502167	2.42192	0.945798	NA	NA	0.167391	0.0502167
	EC1610_Spot 40	166.277	20000	2.16463	1.49791	15.9542	0.00239177	27.0078	2.59952e-05	21.7918	0.806872	0.167574	0.036517	2.42566	0.654336	NA	NA	0.167574	0.036517
	EC1610_Spot 50	191.425	20000	2.85802	10.3958	13.6988	0.000370075	22.9122	2.79148e-05	18.3661	0.801585	0.179948	0.0330489	0.375699	0.0860649	1551.53	258.463	0.179948	0.0330489
	EC1610_Spot 27	74.2599	20000	3.04412	1.49922	50	0.00258548	58.3095	2.81252e-05	30	0.514496	0.181304	0.0543904	2.62187	1.52683	NA	NA	0.181304	0.0543904
	EC1610_Spot 25	190.157	20000	3.19904	2.22241	12.2824	0.00181267	20.9357	2.92302e-05	16.9543	0.809825	0.188427	0.031946	1.83889	0.384637	4085.09	183.518	0.188427	0.031946
	EC1610_Spot 31	51.5914	20000	3.05229	3.68214	15.1068	0.0011046	33.5889	2.95117e-05	30	0.893151	0.190242	0.0570716	1.12097	0.376315	3315.17	238.306	0.190242	0.0570716
	EC1610_Spot 96	187.256	20000	2.76911	4.15985	13.0326	0.000990017	25.4244	2.98819e-05	21.83	0.858627	0.192628	0.0420502	1.00475	0.255325	3122.56	208.378	0.192628	0.0420502
	EC1610_Spot 112	86.0649	20000	3.55677	6.26242	14.9577	0.000669707	33.5221	3.04309e-05	30	0.894931	0.196167	0.0588493	0.679782	0.227801	2452.29	254.555	0.196167	0.0588493
	EC1610_Spot 87	104.45	20000	2.63622	3.40694	33.6109	0.00125364	45.0521	3.09902e-05	30	0.665896	0.199773	0.0599309	1.27213	0.572761	3436.34	540.272	0.199773	0.0599309
	EC1610_Spot 72	97.1009	20000	3.1847	5.0379	15.2114	0.000859409	33.14	3.1415e-05	29.4427	0.888435	0.202511	0.0596239	0.872255	0.288941	2813.85	250.172	0.202511	0.0596239
	EC1610_Spot 29	173.203	156633	2.2894	1.49799	10.886	0.00293985	31.914	3.19537e-05	30	0.940026	0.205983	0.061794	2.98069	0.949864	NA	NA	0.205983	0.061794
	EC1610_Spot 47	148.92	20000	3.13031	4.87424	18.9372	0.000920377	27.3097	3.25507e-05	19.6775	0.720532	0.209832	0.041289	0.934105	0.254984	2867.68	311.097	0.209832	0.041289
	EC1610_Spot 67	142.65	20000	2.42555	1.50406	50	0.00299695	53.8726	3.27065e-05	20.0565	0.372294	0.210836	0.0422855	3.03851	1.63448	NA	NA	0.210836	0.0422855
	EC1610_Spot 104	223.331	20000	2.4678	4.734	19.7655	0.000974086	21.5898	3.3459e-05	8.68597	0.402318	0.215687	0.0187342	0.988589	0.213331	2915.06	323.666	0.215687	0.0187342
	EC1610_Spot 59	109.809	20000	3.63589	13.4114	4.36771	0.000350518	24.9867	3.41093e-05	24.602	0.984604	0.219879	0.0540938	0.355848	0.0888991	1056.77	87.9916	0.219879	0.0540938
	EC1610_Spot 115	187.774	20000	3.79952	15.8348	5.32157	0.000300342	15.82	3.45078e-05	14.8981	0.941726	0.222448	0.03314	0.304916	0.0482306	713.369	113.154	0.222448	0.03314
	EC1610_Spot 10	67.2897	20000	3.57263	2.50399	14.9583	0.00191303	33.5224	3.47571e-05	30	0.894924	0.224055	0.0672153	1.94061	0.649917	3906.68	226.457	0.224055	0.0672153
	EC1610_Spot 42	93.8757	20000	3.47759	30.6173	0.912861	0.000167387	20.5911	3.71857e-05	20.5708	0.999017	0.23971	0.0493094	0.169948	0.0349911	NA	NA	0.23971	0.0493094
	EC1610_Spot 28	45.9984	20000	2.77542	7.27054	9.39278	0.000729924	31.436	3.85063e-05	30	0.954319	0.248223	0.0744654	0.740882	0.232819	2196.46	163.588	0.248223	0.0744654
	EC1610_Spot 71	144.723	20000	2.36211	3.68106	28.0157	0.00145626	29.9698	3.88957e-05	10.6446	0.355177	0.250733	0.0266889	1.47759	0.442509	3315.63	449.431	0.250733	0.0266889
	EC1610_Spot 49	33.8372	20000	3.8378	1.52264	9.67823	0.00352559	31.5225	3.89508e-05	30	0.951701	0.251088	0.0753249	3.57353	1.12449	NA	NA	0.251088	0.0753249
	EC1610_Spot 62	125.939	20000	2.55952	7.77992	12.0868	0.000709187	17.7941	4.00335e-05	13.059	0.733896	0.258067	0.0337003	0.719841	0.128044	2078.03	213.627	0.258067	0.0337003
	EC1610_Spot 23	86.2341	20000	3.42718	2.86761	11.9695	0.00194938	28.7151	4.05607e-05	26.1015	0.908981	0.261466	0.068245	1.97744	0.567272	3701.43	183.207	0.261466	0.068245
	EC1610_Spot 61	32.4397	20000	3.12033	1.50174	4.18283	0.00380373	53.5113	4.14468e-05	53.3475	0.99694	0.267178	0.14253	3.85491	2.05891	NA	NA	0.267178	0.14253
	EC1610_Spot 111	61.8263	20000	3.10367	30.8981	2.93865	0.000185265	23.4843	4.1535e-05	23.2997	0.99214	0.267746	0.0623829	0.188098	0.0441694	NA	NA	0.267746	0.0623829
	EC1610_Spot 107	24.8765	20000	3.84101	1.51021	50	0.00404013	77.7038	4.42712e-05	59.4802	0.765472	0.285384	0.169743	4.09402	3.17481	NA	NA	0.285384	0.169743
	EC1610_Spot 46	31.681	20000	3.91143	1.49767	25.4162	0.0042228	48.3671	4.58887e-05	41.1509	0.850803	0.295811	0.121726	4.27873	2.06515	NA	NA	0.295811	0.121726
	EC1610_Spot 60	31.5983	20000	2.98322	4.34628	39.1435	0.00146836	49.3175	4.6306e-05	30	0.608304	0.298501	0.0895481	1.48985	0.734219	3052.6	656.46	0.298501	0.0895481
	EC1610_Spot 14	84.8126	20000	2.82864	3.49653	25.7672	0.00184309	32.7171	4.67598e-05	20.1609	0.616218	0.301426	0.0607686	1.86972	0.611156	3395.98	409.355	0.301426	0.0607686
	EC1610_Spot 64	52.837	20000	2.72886	1.50174	11.092	0.00435435	29.8784	4.74466e-05	27.7432	0.928537	0.305853	0.0848514	4.41174	1.3153	NA	NA	0.305853	0.0848514
	EC1610_Spot 12	44.5651	20000	3.58575	1.499	50	0.00448378	58.3095	4.87678e-05	30	0.514496	0.31437	0.0943087	4.54258	2.64285	NA	NA	0.31437	0.0943087
	EC1610_Spot 57	52.6333	20000	2.90909	1.5014	1.97288	0.00481048	18.5996	5.24049e-05	18.4946	0.994359	0.337815	0.062476	4.87277	0.904143	NA	NA	0.337815	0.062476
	EC1610_Spot 22	54.5136	20000	2.5289	2.27691	36.8494	0.0033328	41.6151	5.5061e-05	19.3374	0.464672	0.354936	0.0686334	3.37845	1.40361	4049	1787.15	0.354936	0.0686334
	EC1610_Spot 7	33.7338	20000	3.25093	1.49722	21.3994	0.00507733	37.3032	5.51582e-05	30.5548	0.819093	0.355563	0.108638	5.14239	1.91343	NA	NA	0.355563	0.108638
	EC1610_Spot 84	277.918	20000	2.28778	1.50734	3.47574	0.00515964	7.08687	5.64309e-05	6.176	0.871471	0.363767	0.0224656	5.22554	0.369376	NA	NA	0.363767	0.0224656
	EC1610_Spot 5	184.988	20000	2.22253	1.49873	23.7875	0.00525534	27.4507	5.71493e-05	13.7003	0.499088	0.368398	0.0504702	5.32221	1.45716	NA	NA	0.368398	0.0504702
	EC1610_Spot 56	31.8347	20000	4.24141	1.5014	17.8665	0.00559081	34.9172	6.09058e-05	30	0.859175	0.392612	0.11778	5.66101	1.97117	NA	NA	0.392612	0.11778
	EC1610_Spot 37	23.3142	20000	3.48719	1.49791	50	0.00560804	68.6705	6.09517e-05	47.0705	0.685455	0.392908	0.184938	5.6784	3.88852	NA	NA	0.392908	0.184938
	EC1610_Spot 97	31.6278	20000	2.45699	1.50936	50	0.00714241	55.8807	7.82213e-05	24.9531	0.446542	0.504227	0.125815	7.2265	4.02391	NA	NA	0.504227	0.125815
	EC1610_Spot 108	12.9905	20000	4.86979	1.51021	50	0.0104467	61.7042	0.000114473	36.1581	0.585991	0.7379	0.266795	10.5524	6.47762	NA	NA	0.7379	0.266795
	EC1610_Spot 93	15.0477	177772	4.93047	7.16797	8.44035	0.00235359	37.6882	0.000122409	36.7309	0.9746	0.789053	0.289809	2.38699	0.898556	2221.12	146.54	0.789053	0.289809
	EC1610_Spot 54	59.517	20000	2.08904	1.49951	40.0713	0.0149567	42.5741	0.000162732	14.382	0.337811	1.04895	0.150848	15.0743	6.37042	NA	NA	1.04895	0.150848
	EC1610_Spot 102	212.747	20000	2.26559	1.50972	0.754294	0.0185472	4.13968	0.000203171	4.07038	0.98326	1.30959	0.0532999	18.66	0.765409	NA	NA	1.30959	0.0532999
	EC1610_Spot 38	40.2401	869244	3.34902	1.49757	39.4404	0.0378851	49.5535	0.000411663	30	0.605406	2.65321	0.795798	37.7571	18.3684	NA	NA	2.65321	0.795798
	EC1610_Spot 89	100.026	1.94068e+06	3.80222	19.133	3.8894	0.0119709	4.32724	0.00166187	1.89674	0.438325	10.7042	0.202863	12.0829	0.519758	297.046	88.7689	10.7042	0.202863
	EC1610_Spot 3	115.157	558742	3.87164	19.8489	4.26129	0.0121675	4.6695	0.00175236	1.90935	0.408898	11.2866	0.215312	12.2801	0.569965	212.572	98.7921	11.2866	0.215312
	EC1610_Spot 44	58.0817	849958	2.94063	23.3443	4.13735	0.0173666	4.54078	0.00294159	1.8711	0.412066	18.9349	0.353771	17.4824	0.787041	NA	NA	18.9349	0.353771
	EC1610_Spot 51	49.6675	256748	2.46761	19.9384	4.48612	0.020823	4.84538	0.00301246	1.83097	0.377879	19.3904	0.354499	20.9262	1.00358	202.177	104.181	19.3904	0.354499
	EC1610_Spot 9	147.153	1.7652e+06	1.62698	21.3325	2.99687	0.0230671	3.27177	0.00357045	1.31272	0.401225	22.9756	0.301067	23.1559	0.749034	42.9582	71.6665	22.9756	0.301067
	EC1610_Spot 13	151.461	2.05689e+06	1.46655	19.7866	3.17613	0.0258139	3.49482	0.00370606	1.45808	0.417211	23.8466	0.34706	25.8784	0.892978	219.877	73.4873	23.8466	0.34706
	EC1610_Spot 1	61.009	482407	3.12231	18.9997	4.05193	0.0288463	4.55861	0.00397671	2.08873	0.458194	25.5847	0.533335	28.8755	1.29778	312.973	92.2067	25.5847	0.533335
	EC1610_Spot 66	20.7882	80673	3.34824	1.92309	50	0.308766	51.4108	0.0043084	11.9612	0.232659	27.7141	3.30782	273.224	123.764	4298.93	NA	27.7141	3.30782
	EC1610_Spot 119	124.192	1.30402e+06	2.48373	22.0328	2.5071	0.0323014	2.93977	0.00516392	1.53515	0.5222	33.2031	0.508406	32.2798	0.934026	NA	NA	33.2031	0.508406
	EC1610_Spot 4	44.1403	743570	2.63208	18.8647	3.40288	0.0815241	3.78599	0.0111589	1.65956	0.438342	71.5368	1.18063	79.5768	2.89774	329.203	77.202	71.5368	1.18063
	EC1610_Spot 74	245.069	2.93829e+07	4.51359	16.5359	0.797577	0.857499	1.51398	0.102884	1.28686	0.849984	631.291	7.73871	628.757	7.09679	620.573	17.2302	631.291	7.73871
	EC1610_Spot 65	59.5038	2.61546e+07	1.49888	15.7358	0.861723	1.02277	1.59713	0.116776	1.34471	0.841956	711.983	9.06434	715.307	8.19995	726.652	18.2585	711.983	9.06434
	EC1610_Spot 20	26.5603	8.94528e+07	2.65222	13.4578	1.35568	1.74664	2.23434	0.170555	1.77607	0.794896	1015.17	16.6821	1025.92	14.4282	1049.82	27.3448	1049.82	27.3448
	EC1610_Spot 6	63.8181	3.34921e+07	1.47727	13.2777	1.06633	1.79779	1.71733	0.1732	1.34616	0.783872	1029.72	12.8113	1044.65	11.2053	1076.93	21.4055	1076.93	21.4055
	EC1610_Spot 53	73.304	6.46328e+07	1.58788	9.54312	1.03746	4.32974	1.89261	0.299806	1.58292	0.836371	1690.34	23.5364	1699.04	15.6128	1710.57	19.0865	1710.57	19.0865
2	EC16LR3
	EC16LR3_Spot 31	184.065	20	3.237	2	34.6673	0.00112419	39.7264	1.63138e-05	19.4	0.48834	0.105165	0.0204018	1.14084	0.452959	NA	NA	0.105165	0.0204018
	EC16LR3_Spot 87	298.894	20	2.64132	2	39.9167	0.00112849	43.1827	1.63763e-05	16.4743	0.381503	0.105567	0.0173914	1.1452	0.494251	NA	NA	0.105567	0.0173914
	EC16LR3_Spot 108	134.449	20	2.46305	2	37.4557	0.00115775	40.733	1.68009e-05	16.0077	0.39299	0.108305	0.0173369	1.17488	0.478288	NA	NA	0.108305	0.0173369
	EC16LR3_Spot 30	129.091	20	2.87008	2	17.3512	0.00120933	25.9999	1.75495e-05	19.3631	0.744739	0.11313	0.0219053	1.22719	0.318876	NA	NA	0.11313	0.0219053
	EC16LR3_Spot 63	89.9544	20	2.82236	2	7.20019	0.0012193	21.9666	1.76941e-05	20.7531	0.944755	0.114063	0.0236713	1.2373	0.271629	NA	NA	0.114063	0.0236713
	EC16LR3_Spot 34	997.297	140	1.88552	21.0241	71.3064	0.000116072	73.5923	1.77065e-05	18.1996	0.247303	0.114143	0.0207733	0.117851	0.0867241	77.6352	NA	0.114143	0.0207733
	EC16LR3_Spot 93	406.461	55	1.82802	15.6245	15.8259	0.000174138	29.0847	1.97418e-05	24.4021	0.839001	0.127262	0.0310544	0.176801	0.0514176	741.677	336.688	0.127262	0.0310544
	EC16LR3_Spot 83	193.371	33	2.64953	19.3337	57.7879	0.000170254	62.7092	2.38836e-05	24.3517	0.388327	0.153962	0.0374918	0.172858	0.108389	273.163	NA	0.153962	0.0374918
	EC16LR3_Spot 104	267.184	80	2.69419	18.5375	5.30273	0.000203877	23.4027	2.74225e-05	22.794	0.973991	0.176775	0.0402934	0.206992	0.0484368	368.721	119.549	0.176775	0.0402934
	EC16LR3_Spot 94	304.573	75	3.44038	16.4035	11.3137	0.000239402	21.9245	2.84939e-05	18.7799	0.856572	0.183681	0.0344947	0.243055	0.0532823	637.93	244.137	0.183681	0.0344947
	EC16LR3_Spot 77	243.511	52	3.10859	17.828	33.3859	0.000223213	39.9368	2.88741e-05	21.9164	0.548778	0.186132	0.0407929	0.226621	0.090495	455.995	760.319	0.186132	0.0407929
	EC16LR3_Spot 52	211.826	40	3.26467	18.8006	25.3214	0.000213393	30.3075	2.91099e-05	16.6545	0.549517	0.187652	0.0312519	0.216653	0.0656549	336.88	582.032	0.187652	0.0312519
	EC16LR3_Spot 35	226.723	40	4.0864	18.1753	47.6995	0.000228389	50.5792	3.01192e-05	16.8229	0.332605	0.194158	0.0326625	0.231875	0.117267	413.003	1128.06	0.194158	0.0326625
	EC16LR3_Spot 46	245.279	68	2.65119	20.5001	25.1972	0.000203695	34.6002	3.02986e-05	23.7123	0.685323	0.195315	0.0463129	0.206807	0.0715484	137.31	600.204	0.195315	0.0463129
	EC16LR3_Spot 51	251.799	51	2.3219	20.573	112.746	0.00020444	114.237	3.05176e-05	18.3979	0.16105	0.196726	0.036193	0.207563	0.237091	128.956	NA	0.196726	0.036193
	EC16LR3_Spot 82	168.08	43	2.98782	18.7766	17.2396	0.000243115	30.0944	3.3122e-05	24.6671	0.819659	0.213514	0.052667	0.246825	0.0742714	339.822	392.948	0.213514	0.052667
	EC16LR3_Spot 69	272.923	165	2.70279	18.5728	2.08519	0.000251545	23.3015	3.38986e-05	23.208	0.995988	0.218521	0.0507133	0.255382	0.0595003	364.426	47.0183	0.218521	0.0507133
	EC16LR3_Spot 61	170.43	84	2.46189	21.4123	10.8316	0.000219352	21.5533	3.40794e-05	18.6338	0.864547	0.219686	0.0409353	0.222702	0.0479943	34.0247	260.045	0.219686	0.0409353
	EC16LR3_Spot 102	203.128	50	2.86306	3.56843	23.4563	0.00138211	29.092	3.57854e-05	17.2089	0.591536	0.230683	0.0396975	1.4024	0.407704	3364.24	372.227	0.230683	0.0396975
	EC16LR3_Spot 55	153.333	65	2.16325	18.9424	3.47641	0.000276173	21.5619	3.7958e-05	21.2798	0.986917	0.244689	0.0520681	0.280382	0.0604473	319.872	79.0048	0.244689	0.0520681
	EC16LR3_Spot 4	185.614	70	3.26721	20.1634	24.2052	0.000260038	31.5542	3.80442e-05	20.2429	0.641529	0.245244	0.0496436	0.264004	0.0832934	176.023	571.873	0.245244	0.0496436
	EC16LR3_Spot 107	165.462	130	3.17631	20.0633	9.18414	0.00026593	24.5939	3.8713e-05	22.8148	0.927658	0.249555	0.0569343	0.269985	0.0663911	187.624	214.126	0.249555	0.0569343
	EC16LR3_Spot 92	153.858	44	2.14057	17.0793	45.4059	0.000313018	48.6095	3.87906e-05	17.3549	0.357027	0.250056	0.0433961	0.317784	0.154449	550.443	1043.46	0.250056	0.0433961
	EC16LR3_Spot 48	130.366	46	4.47434	19.4376	62.2225	0.000279453	66.9132	3.9413e-05	24.6118	0.367816	0.254068	0.0625293	0.283712	0.189815	260.907	NA	0.254068	0.0625293
	EC16LR3_Spot 16	153.275	58	3.33558	18.9126	13.3384	0.000290086	28.6955	3.98074e-05	25.407	0.885402	0.25661	0.0651957	0.294505	0.0844975	323.43	304.116	0.25661	0.0651957
	EC16LR3_Spot 79	185.281	95	3.17556	18.5561	12.4547	0.000298966	24.5336	4.02529e-05	21.1371	0.861558	0.259482	0.0548459	0.30352	0.0744532	366.457	281.654	0.259482	0.0548459
	EC16LR3_Spot 6	163.392	80	3.33626	16.1464	3.81729	0.000346936	18.6122	4.06456e-05	18.2165	0.978742	0.262013	0.0477288	0.352212	0.0655431	671.824	81.6729	0.262013	0.0477288
	EC16LR3_Spot 119	168.161	60	3.7755	13.8036	28.2732	0.000407737	33.1778	4.08375e-05	17.3607	0.523263	0.26325	0.045701	0.413925	0.137303	998.452	585.69	0.26325	0.045701
	EC16LR3_Spot 116	154.881	120	3.43542	16.8905	11.7163	0.000344953	46.2693	4.22757e-05	44.7613	0.967409	0.272521	0.121981	0.350199	0.162006	574.655	255.541	0.272521	0.121981
	EC16LR3_Spot 32	131.22	84.8913	2.612	2.4888	8.96705	0.00234714	22.1204	4.23853e-05	20.2213	0.91415	0.273227	0.055249	2.38045	0.525947	NA	NA	0.273227	0.055249
	EC16LR3_Spot 42	135.942	62	3.58967	18.2978	137.524	0.000329194	138.582	4.37058e-05	17.0923	0.123338	0.28174	0.0481549	0.334203	0.463069	397.964	NA	0.28174	0.0481549
	EC16LR3_Spot 56	101.554	51.5	4.04831	20.7899	31.6318	0.000291532	41.7029	4.3977e-05	27.1764	0.651668	0.283488	0.0770403	0.295973	0.123411	104.227	764.463	0.283488	0.0770403
	EC16LR3_Spot 27	149.518	156	4.01141	16.9506	9.85731	0.000371676	22.7723	4.57127e-05	20.5283	0.901459	0.294676	0.0604905	0.377324	0.0859091	566.935	215.082	0.294676	0.0604905
	EC16LR3_Spot 91	116.7	38.5	3.88836	14.4633	4.27992	0.000435783	15.4091	4.57324e-05	14.8028	0.960653	0.294804	0.0436382	0.442391	0.0681536	902.921	88.2663	0.294804	0.0436382
	EC16LR3_Spot 112	138.621	140	3.08088	20.5657	0.629069	0.000306976	18.3313	4.58074e-05	18.3205	0.999411	0.295287	0.0540968	0.311651	0.0571209	129.767	14.7991	0.295287	0.0540968
	EC16LR3_Spot 113	97.6459	62	2.84064	19.7322	30.9552	0.000372126	37.8012	5.32787e-05	21.6957	0.573943	0.343448	0.0745114	0.377781	0.142779	226.233	731.021	0.343448	0.0745114
	EC16LR3_Spot 118	153.213	140	3.5307	19.568	2.35777	0.000400096	22.0805	5.68066e-05	21.9543	0.994283	0.366188	0.0803918	0.40617	0.0896665	245.515	54.3083	0.366188	0.0803918
	EC16LR3_Spot 41	35.3881	37	4.87253	16.8904	4.51743	0.000611264	27.1729	7.49129e-05	26.7948	0.986084	0.482902	0.129388	0.620477	0.16855	574.67	98.2821	0.482902	0.129388
	EC16LR3_Spot 89	42.5893	40	2.40576	17.8358	4.68263	0.000652637	21.5889	8.44603e-05	21.0749	0.976194	0.544443	0.114736	0.66246	0.142971	455.036	103.97	0.544443	0.114736
	EC16LR3_Spot 23	51.4527	120	2.21064	17.5357	2.68542	0.000714135	21.6731	9.08637e-05	21.5061	0.992294	0.585719	0.125959	0.724862	0.157044	492.555	59.2414	0.585719	0.125959
	EC16LR3_Spot 20	38.8469	76	3.31483	19.2811	18.9699	0.000744518	28.5173	0.000104159	21.2927	0.74666	0.671415	0.142955	0.75569	0.215422	279.448	437.668	0.671415	0.142955
	EC16LR3_Spot 38	131.744	85	3.72975	17.843	14.307	0.00144507	31.8843	0.000187088	28.4941	0.893674	1.20593	0.343588	1.46624	0.467163	454.145	319.008	1.20593	0.343588
	EC16LR3_Spot 80	158.015	6775.95	3.04744	2.01288	3.32297	0.0187663	26.0033	0.000274084	25.7901	0.991801	1.76662	0.45555	18.8784	4.86368	NA	NA	1.76662	0.45555
	EC16LR3_Spot 68	158.278	178.571	2.75687	26.8323	95.7671	0.00198507	96.2846	0.000386475	9.9697	0.103544	2.4909	0.248287	2.01361	1.93688	NA	NA	2.4909	0.248287
	EC16LR3_Spot 5	24.01	204.359	1.71466	21.0926	89.2525	0.0108709	89.4821	0.00166373	6.4065	0.0715953	10.7162	0.685961	10.9785	9.77122	NA	NA	10.7162	0.685961
	EC16LR3_Spot 105	43.4416	180	2.62836	19.6806	95.5318	0.0145444	95.6273	0.00207692	4.27157	0.044669	13.3748	0.570723	14.6617	13.9207	232.263	NA	13.3748	0.570723
	EC16LR3_Spot 9	58.2276	172.932	2.28256	36.5978	180.094	0.00819024	180.159	0.0021749	4.83993	0.0268648	14.0051	0.6771	8.28236	14.8618	NA	NA	14.0051	0.6771
	EC16LR3_Spot 47	78.586	263.669	2.1157	99.4167	192.514	0.00302716	192.563	0.00218365	4.37171	0.0227027	14.0614	0.614052	3.06909	5.90108	NA	NA	14.0614	0.614052
	EC16LR3_Spot 76	57.9888	234.515	2.79559	47.0691	167.322	0.00645885	167.39	0.00220586	4.80252	0.0286905	14.2042	0.68141	6.53712	10.9078	NA	NA	14.2042	0.68141
	EC16LR3_Spot 49	62.7769	392.979	1.68112	92.6476	17.732	0.0032854	18.2136	0.00220857	4.16053	0.22843	14.2216	0.591043	3.33047	0.605605	NA	NA	14.2216	0.591043
	EC16LR3_Spot 8	130.913	275.885	1.83292	266.628	124.811	0.00114799	124.875	0.00222091	3.98012	0.0318729	14.301	0.568567	1.16498	1.45393	NA	NA	14.301	0.568567
	EC16LR3_Spot 109	55.1746	186.971	1.84687	22.1631	14.269	0.0138197	15.2948	0.00222236	5.50684	0.360047	14.3104	0.787174	13.9362	2.11695	NA	NA	14.3104	0.787174
	EC16LR3_Spot 120	276.499	859.49	0.911209	34.6838	7.14898	0.00886055	7.61223	0.00222985	2.61496	0.343521	14.3585	0.375052	8.95723	0.678846	NA	NA	14.3585	0.375052
	EC16LR3_Spot 110	78.903	173.506	2.02932	23.7516	9.96322	0.0129544	11.1599	0.00223252	5.02774	0.450517	14.3757	0.721969	13.0692	1.44916	NA	NA	14.3757	0.721969
	EC16LR3_Spot 70	64.0617	354.744	1.45194	237.136	266.334	0.00129977	266.362	0.00223641	3.89092	0.0146076	14.4007	0.559695	1.31891	3.5108	NA	NA	14.4007	0.559695
	EC16LR3_Spot 45	65.6818	699.168	1.41199	23.2854	8.83032	0.0133204	9.87353	0.00225056	4.41725	0.447382	14.4917	0.639416	13.4361	1.31788	NA	NA	14.4917	0.639416
	EC16LR3_Spot 117	35.8788	172.091	2.50864	27.2122	9.27763	0.0114026	10.2673	0.00225141	4.39799	0.428351	14.4972	0.63687	11.5125	1.17535	NA	NA	14.4972	0.63687
	EC16LR3_Spot 33	54.8127	625.539	3.25066	26.0344	8.03443	0.0119601	9.02486	0.00225927	4.11048	0.455462	14.5478	0.597309	12.072	1.08303	NA	NA	14.5478	0.597309
	EC16LR3_Spot 99	73.9372	432.075	1.48672	62.2531	112.605	0.00512694	112.672	0.00231583	3.89728	0.0345896	14.9115	0.580473	5.19251	5.83563	NA	NA	14.9115	0.580473
	EC16LR3_Spot 97	59.0159	1714.95	1.58628	26.9024	6.12174	0.0119483	7.72976	0.00233229	4.71948	0.61056	15.0174	0.70792	12.0602	0.926707	NA	NA	15.0174	0.70792
	EC16LR3_Spot 66	24.2752	294.652	3.10807	203.726	8.37027	0.00159885	9.95017	0.00236342	5.38	0.540694	15.2176	0.81774	1.62215	0.161277	NA	NA	15.2176	0.81774
	EC16LR3_Spot 1	59.6651	254.594	2.10973	207.02	55.3103	0.00158029	55.4612	0.00237377	4.08806	0.0737104	15.2842	0.624086	1.60334	0.888528	NA	NA	15.2842	0.624086
	EC16LR3_Spot 29	54.4011	10760.3	2.86263	16.865	8.32018	0.0196199	9.69797	0.00240089	4.98249	0.513766	15.4586	0.769298	19.7288	1.89483	577.91	181.092	15.4586	0.769298
	EC16LR3_Spot 115	79.8842	359.309	3.53655	117.975	166.156	0.00282609	166.183	0.00241916	2.9955	0.0180253	15.576	0.466017	2.86552	4.75533	NA	NA	15.576	0.466017
	EC16LR3_Spot 54	58.3292	727.507	2.97622	35.1122	11.5265	0.00955281	12.3544	0.00243376	4.44628	0.359896	15.6699	0.695883	9.65372	1.187	NA	NA	15.6699	0.695883
	EC16LR3_Spot 88	35.0863	334.17	2.4632	220.326	91.1542	0.00152277	91.2719	0.00243438	4.63288	0.0507591	15.674	0.725273	1.54502	1.4091	NA	NA	15.674	0.725273
	EC16LR3_Spot 12	64.1315	236.381	1.49476	53.5186	43.5861	0.0063228	43.8422	0.00245528	4.73195	0.107931	15.8084	0.747127	6.39985	2.79702	NA	NA	15.8084	0.747127
	EC16LR3_Spot 7	42.3904	721.841	2.26466	38.1884	22.5136	0.00902092	23.1774	0.0024996	5.50712	0.237607	16.0933	0.885173	9.11862	2.104	NA	NA	16.0933	0.885173
	EC16LR3_Spot 10	24.0446	1245.83	2.31236	16.1841	11.0719	0.0216258	12.3022	0.00253951	5.36254	0.435901	16.35	0.875663	21.7244	2.6442	666.832	237.732	16.35	0.875663
	EC16LR3_Spot 11	111.092	2951.83	1.49246	25.0037	3.91552	0.0141392	5.44199	0.00256517	3.77942	0.694492	16.515	0.623371	14.2561	0.770397	NA	NA	16.515	0.623371
	EC16LR3_Spot 3	61.6539	1512.86	2.18844	43.1977	9.68717	0.00832623	10.6959	0.00260974	4.53446	0.423943	16.8015	0.760867	8.41931	0.896799	NA	NA	16.8015	0.760867
	EC16LR3_Spot 103	55.7836	599.806	1.98231	8.39829	20.3119	0.0450073	21.2474	0.00274259	6.23554	0.293472	17.6557	1.09942	44.7011	9.29206	1942.33	367.271	17.6557	1.09942
	EC16LR3_Spot 86	105.803	271.043	1.55817	70.8141	16.8793	0.00702499	17.1279	0.00360955	2.90746	0.16975	23.2268	0.674093	7.10812	1.21322	NA	NA	23.2268	0.674093
	EC16LR3_Spot 64	119.065	751.571	2.44484	35.034	16.4854	0.0147758	16.8742	0.00375603	3.60161	0.213439	24.1676	0.868792	14.8934	2.4948	NA	NA	24.1676	0.868792
	EC16LR3_Spot 39	41.2903	206.274	3.48157	34.8811	76.9341	0.0188778	77.0671	0.00477781	4.52569	0.0587241	30.7264	1.38727	18.9895	14.4996	NA	NA	30.7264	1.38727
	EC16LR3_Spot 14	73.1399	2757.72	1.82683	14.9592	4.91458	0.0601809	5.46038	0.00653211	2.37963	0.435799	41.9717	0.995528	59.3385	3.14726	833.055	102.478	41.9717	0.995528
	EC16LR3_Spot 15	159.271	4384.63	1.73658	22.4597	4.30751	0.0422021	4.69291	0.00687743	1.86245	0.396865	44.183	0.820073	41.9718	1.92954	NA	NA	44.183	0.820073
	EC16LR3_Spot 59	263.636	32337.6	1.23949	21.1685	1.88962	0.0609938	3.43328	0.00936834	2.86648	0.834911	60.111	1.71506	60.1168	2.00407	61.3586	45.05	60.111	1.71506
	EC16LR3_Spot 44	38.2896	479.698	3.59173	48.3947	13.2655	0.032405	13.6999	0.0113788	3.42266	0.249831	72.9384	2.48236	32.3816	4.36629	NA	NA	72.9384	2.48236
	EC16LR3_Spot 58	865.901	23307.5	3.86256	21.0986	1.03426	0.0743515	2.56841	0.0113824	2.35096	0.915338	72.961	1.70561	72.8205	1.80484	69.2508	24.5948	72.961	1.70561
	EC16LR3_Spot 26	81.8484	48444.1	2.07353	17.1431	1.22707	0.681095	2.24609	0.0847199	1.88129	0.837581	524.234	9.47199	527.436	9.24028	542.284	26.8488	524.234	9.47199
	EC16LR3_Spot 72	314.747	35325	6.41528	15.571	0.91396	1.06655	2.78086	0.1205	2.62638	0.944448	733.443	18.2076	737.049	14.5739	748.924	19.289	733.443	18.2076
	EC16LR3_Spot 2	124.705	34950	2.15437	15.1133	1.06131	1.2796	2.76925	0.14032	2.55781	0.923645	846.473	20.2899	836.675	15.7849	811.68	22.213	846.473	20.2899
	EC16LR3_Spot 111	79.2919	8531.1	3.57923	14.0182	1.30823	1.62288	3.29446	0.165069	3.02358	0.917775	984.887	27.6157	979.106	20.7006	967.054	26.684	967.054	26.684
	EC16LR3_Spot 37	85.6527	140442	3.50461	13.5159	0.974793	1.70613	3.01941	0.167319	2.85773	0.946453	997.32	26.4057	1010.83	19.3316	1041.1	19.6926	1041.1	19.6926
	EC16LR3_Spot 71	110.47	68765.7	3.27228	12.9509	0.957773	1.88582	2.70399	0.17721	2.52868	0.935167	1051.71	24.5385	1076.11	17.9437	1126.73	19.085	1126.73	19.085
	EC16LR3_Spot 18	83.4626	50339.4	1.3917	12.6312	1.11338	2.21192	4.05611	0.202722	3.90031	0.961589	1189.93	42.38	1184.82	28.3699	1176.39	22.0315	1176.39	22.0315
	EC16LR3_Spot 98	95.3224	37898.7	1.93302	11.9177	0.882707	2.54937	2.53674	0.220451	2.37821	0.937506	1284.26	27.6925	1286.26	18.5027	1290.43	17.159	1290.43	17.159
	EC16LR3_Spot 101	157.205	60397.3	1.07438	6.37106	0.94657	9.56258	2.30402	0.442053	2.1006	0.91171	2359.83	41.5108	2393.58	21.1829	2423.16	16.0573	2423.16	16.0573
3	EC1505
	EC1505_Spot 16	1433.74	1827.7	0.803199	21.6519	5.63784	0.00339957	6.40057	0.00053385	3.03017	0.473423	3.4405	0.104225	3.44602	0.220191	7.31539	135.775	3.4405	0.104225
	EC1505_Spot 114	134.542	484.726	1.51611	35.1001	49.9411	0.0174623	50.0837	0.00444539	3.77643	0.0754023	28.5933	1.07741	17.5779	8.72813	1320.49	1677.72	28.5933	1.07741
	EC1505_Spot 70	446.011	16001.6	1.01804	20.559	3.37966	0.0355748	4.44939	0.00530447	2.89396	0.650416	34.1045	0.984363	35.4944	1.552	130.538	79.5136	34.1045	0.984363
	EC1505_Spot 92	106.632	829.285	2.8802	38.8155	36.2952	0.0236477	36.5301	0.00665721	4.13578	0.113216	42.7729	1.76314	23.7319	8.56896	1653.91	1284.41	42.7729	1.76314
	EC1505_Spot 120	229.795	928.406	2.20864	29.9617	2.70718	0.046321	4.49559	0.0100657	3.58907	0.798355	64.5632	2.30566	45.9768	2.02083	842.716	77.5347	64.5632	2.30566
	EC1505_Spot 57	203.179	10914.3	1.28904	21.713	2.65792	0.0716026	4.19374	0.0112758	3.2439	0.773511	72.2816	2.33165	70.2191	2.8453	0.526529	64.0519	72.2816	2.33165
	EC1505_Spot 3	709.834	44750.6	1.37758	20.5229	1.10539	0.145282	2.48573	0.0216247	2.22642	0.895683	137.916	3.03798	137.738	3.20173	134.69	25.9579	137.916	3.03798
	EC1505_Spot 23	788.012	56972.2	1.80754	19.7826	1.24999	0.170971	2.72741	0.0245303	2.4241	0.888794	156.224	3.74152	160.261	4.04351	220.325	28.9163	156.224	3.74152
	EC1505_Spot 45	980.457	31617	21.5798	19.6469	1.09242	0.256348	3.05265	0.0365276	2.85049	0.933776	231.274	6.47557	231.719	6.32458	236.233	25.1948	231.274	6.47557
	EC1505_Spot 8	469.085	23585.6	1.50054	18.8424	1.18769	0.281157	2.76066	0.0384224	2.49212	0.902724	243.047	5.94425	251.575	6.1517	331.845	26.9175	243.047	5.94425
	EC1505_Spot 82	345.393	9831.73	1.99053	18.8078	1.69508	0.288208	3.51937	0.0393137	3.08426	0.876367	248.577	7.52084	257.148	7.99511	336.011	38.3976	248.577	7.52084
	EC1505_Spot 4	250.265	24956.2	1.02963	19.3872	1.10385	0.28296	3.32574	0.0397868	3.1372	0.94331	251.512	7.73849	253.003	7.44798	266.856	25.3337	251.512	7.73849
	EC1505_Spot 65	681.48	948.309	2.01206	9.44718	12.2235	0.581712	13.8396	0.0398574	6.48997	0.468943	251.949	16.036	465.561	51.726	1729.14	225.214	251.949	16.036
	EC1505_Spot 61	361.395	9345.47	1.39214	20.1264	1.25275	0.273543	3.31663	0.0399293	3.07094	0.925921	252.394	7.60112	245.522	7.23347	180.303	29.196	252.394	7.60112
	EC1505_Spot 50	807.668	91081.4	2.24796	19.4024	0.816279	0.284598	2.66122	0.0400485	2.53294	0.951796	253.134	6.28749	254.299	5.98662	265.057	18.7334	253.134	6.28749
	EC1505_Spot 15	200.727	16052.5	1.07719	19.3783	1.33841	0.291187	2.96868	0.0409247	2.64986	0.892604	258.562	6.71596	259.493	6.79803	267.889	30.7018	258.562	6.71596
	EC1505_Spot 28	223.567	19402.8	2.80989	19.4714	1.52187	0.290065	3.48418	0.0409628	3.13424	0.899561	258.798	7.95069	258.61	7.95469	256.893	34.9696	258.798	7.95069
	EC1505_Spot 81	91.8385	3471.45	1.24566	20.134	1.73492	0.28513	3.68543	0.0416362	3.25153	0.882266	262.967	8.3784	254.719	8.30278	179.43	40.4298	262.967	8.3784
	EC1505_Spot 91	43.1848	3000.56	1.73556	20.0024	2.7934	0.289702	4.51587	0.0420274	3.54824	0.785727	265.388	9.22541	258.325	10.3003	194.736	64.9495	265.388	9.22541
	EC1505_Spot 109	453.167	9991.87	1.95209	19.411	0.990799	0.301714	2.35118	0.0424758	2.13222	0.906872	268.161	5.60049	267.738	5.5335	264.063	22.7431	268.161	5.60049
	EC1505_Spot 53	1197.74	75134.5	5.33344	18.866	1.11418	0.311688	2.6057	0.0426481	2.35547	0.90397	269.226	6.21094	275.488	6.28707	329.007	25.2733	269.226	6.21094
	EC1505_Spot 68	381.738	3.93595e+06	7.63066	19.5435	1.22887	0.309536	2.60946	0.0438745	2.30199	0.882171	276.804	6.23715	273.821	6.26297	248.38	28.3046	276.804	6.23715
	EC1505_Spot 33	187.235	123068	1.98228	18.4481	1.16821	0.38275	3.27435	0.0512114	3.05887	0.93419	321.955	9.60629	329.06	9.2032	379.597	26.2532	321.955	9.60629
	EC1505_Spot 43	820.152	785270	1.59353	18.204	1.11423	0.394677	2.85105	0.0521084	2.62431	0.92047	327.453	8.37878	337.78	8.19243	409.471	24.9252	327.453	8.37878
	EC1505_Spot 41	938.443	17577	0.661761	17.0072	1.16182	0.586147	3.66284	0.0723001	3.4737	0.948362	449.998	15.0985	468.404	13.7448	559.636	25.348	449.998	15.0985
	EC1505_Spot 35	506.705	367335	1.42894	17.3725	0.978042	0.591988	2.96393	0.0745889	2.79791	0.943987	463.743	12.5194	472.136	11.1915	513.134	21.4789	463.743	12.5194
	EC1505_Spot 39	626.765	43468.9	0.842942	17.6956	0.968103	0.581235	2.7679	0.0745959	2.59308	0.936839	463.785	11.6039	465.255	10.3312	472.536	21.4216	463.785	11.6039
	EC1505_Spot 25	437.596	27434.6	4.79513	17.606	1.18619	0.604179	3.26657	0.0771482	3.04359	0.931739	479.078	14.0526	479.883	12.4927	483.751	26.1839	479.078	14.0526
	EC1505_Spot 106	313.694	20776.1	2.21326	17.5389	0.984339	0.633597	2.44503	0.0805961	2.23814	0.915382	499.68	10.7611	498.334	9.62932	492.181	21.6922	499.68	10.7611
	EC1505_Spot 62	307.426	73226.7	4.35923	17.2788	0.940795	0.645849	3.06736	0.0809365	2.91952	0.951802	501.71	14.0921	505.921	12.2224	524.983	20.6085	501.71	14.0921
	EC1505_Spot 29	256.575	17297.6	1.05549	17.1595	1.05949	0.675208	2.85419	0.084031	2.65026	0.928551	520.139	13.2436	523.874	11.6815	540.209	23.172	520.139	13.2436
	EC1505_Spot 59	133.221	12198.6	1.66031	17.3771	1.30416	0.669611	4.00511	0.0843916	3.78683	0.9455	522.283	18.998	520.476	16.3113	512.548	28.6375	522.283	18.998
	EC1505_Spot 34	178.973	26820.8	2.51627	16.3742	1.03356	0.806368	4.51348	0.0957618	4.39355	0.973428	589.524	24.7521	600.415	20.461	641.781	22.2432	589.524	24.7521
	EC1505_Spot 20	558.908	35402.2	1.01454	16.5028	0.890086	0.815626	2.88505	0.0976218	2.74431	0.951219	600.457	15.7343	605.605	13.1605	624.897	19.2113	600.457	15.7343
	EC1505_Spot 22	253.223	89261.5	2.57561	16.4325	1.00717	0.838809	2.96581	0.0999693	2.78956	0.940573	614.229	16.3434	618.488	13.7381	634.127	21.7026	614.229	16.3434
	EC1505_Spot 72	1061.58	339350	3.29968	16.4447	0.906279	0.850572	2.64393	0.101446	2.48375	0.939416	622.879	14.7468	624.963	12.3397	632.534	19.5334	622.879	14.7468
	EC1505_Spot 89	92.5135	119856	1.53766	16.345	1.27246	0.877364	4.17459	0.104007	3.97593	0.952413	637.849	24.1463	639.558	19.8121	645.621	27.3546	637.849	24.1463
	EC1505_Spot 71	74.0298	34451.9	0.467433	16.103	1.20873	0.916613	3.40437	0.107051	3.18257	0.934846	655.601	19.8391	660.567	16.5332	677.576	25.8259	655.601	19.8391
	EC1505_Spot 100	72.1445	13677.4	0.991905	15.9399	1.25227	0.948273	3.80899	0.109627	3.59725	0.944411	670.58	22.9103	677.203	18.8266	699.307	26.6664	670.58	22.9103
	EC1505_Spot 56	373.103	39518.2	6.96099	14.9133	1.08497	1.06298	2.98758	0.114973	2.78361	0.931726	701.566	18.5038	735.29	15.632	839.438	22.5724	701.566	18.5038
	EC1505_Spot 21	91.1124	12595.6	1.12349	15.3505	0.954307	1.12732	4.18659	0.125507	4.07637	0.973674	762.184	29.3032	766.474	22.5307	778.981	20.0638	762.184	29.3032
	EC1505_Spot 2	720.673	1.15181e+06	7.62468	14.7555	1.08597	1.22556	4.42516	0.131156	4.28984	0.96942	794.454	32.0647	812.314	24.748	861.55	22.5524	794.454	32.0647
	EC1505_Spot 26	214.619	37338.1	1.35103	15.0481	1.0433	1.21033	3.26458	0.132095	3.09338	0.947558	799.806	23.2679	805.343	18.1531	820.708	21.8091	799.806	23.2679
	EC1505_Spot 12	147.02	10651.9	2.28612	14.5625	1.07054	1.47297	2.82235	0.155571	2.61144	0.92527	932.115	22.6637	919.348	17.0709	888.845	22.099	888.845	22.099
	EC1505_Spot 80	478.614	123984	3.01279	14.2664	0.729651	1.41034	2.47762	0.145927	2.36774	0.955652	878.09	19.4371	893.3	14.7211	931.117	14.9761	931.117	14.9761
	EC1505_Spot 83	292.129	120368	2.87589	14.0301	0.882645	1.53501	2.53254	0.156197	2.37375	0.937301	935.606	20.6726	944.508	15.5723	965.342	18.0398	965.342	18.0398
	EC1505_Spot 51	509.353	32637.1	2.85247	13.9086	0.759703	1.58199	2.63487	0.159583	2.52298	0.957532	954.459	22.383	963.154	16.3937	983.076	15.4539	983.076	15.4539
	EC1505_Spot 6	237.815	38116.2	2.05521	13.8013	1.00115	1.7572	3.70525	0.17589	3.56743	0.962805	1044.48	34.3996	1029.82	23.9818	998.78	20.3184	998.78	20.3184
	EC1505_Spot 1	229.964	73378.4	2.28906	13.757	0.771523	1.70652	2.48416	0.170269	2.36131	0.950548	1013.59	22.1474	1010.98	15.9054	1005.3	15.6563	1005.3	15.6563
	EC1505_Spot 119	217.896	32973.7	1.61233	13.7074	0.963151	1.74017	3.57879	0.173001	3.44675	0.963104	1028.62	32.7703	1023.53	23.081	1012.63	19.52	1012.63	19.52
	EC1505_Spot 32	1185.58	104970	4.55045	13.6671	0.967625	1.70032	2.84851	0.168541	2.67912	0.940536	1004.07	24.9101	1008.65	18.2142	1018.61	19.596	1018.61	19.596
	EC1505_Spot 63	413.027	46873.3	2.53519	13.634	0.964555	1.79265	2.42265	0.177263	2.22236	0.917324	1052	21.5713	1042.79	15.7919	1023.51	19.5183	1023.51	19.5183
	EC1505_Spot 27	41.7226	38129.8	0.655129	13.611	1.07778	1.71074	4.36979	0.168879	4.23479	0.969106	1005.93	39.4422	1012.56	28.009	1026.92	21.8185	1026.92	21.8185
	EC1505_Spot 67	60.3738	11611.6	1.25092	13.5464	1.40276	1.84597	4.48938	0.181363	4.2646	0.94993	1074.42	42.2054	1061.99	29.5756	1036.54	28.3513	1036.54	28.3513
	EC1505_Spot 87	114.226	11927.7	1.52069	13.497	1.18899	1.76586	3.56032	0.172859	3.35592	0.942588	1027.85	31.8845	1033	23.0845	1043.91	24.0056	1043.91	24.0056
	EC1505_Spot 118	300.864	65033.4	1.88533	13.4913	1.01122	1.73664	2.91077	0.169927	2.72948	0.937715	1011.71	25.5566	1022.22	18.7577	1044.77	20.4167	1044.77	20.4167
	EC1505_Spot 96	236.342	39121.3	0.823539	13.4814	0.838874	1.74286	2.93007	0.17041	2.80742	0.95814	1014.37	26.3502	1024.52	18.9067	1046.29	16.9369	1046.29	16.9369
	EC1505_Spot 48	193.537	93193.4	3.83764	13.4713	1.20529	1.69768	3.06494	0.165869	2.818	0.919431	989.312	25.8451	1007.66	19.5871	1047.79	24.3207	1047.79	24.3207
	EC1505_Spot 116	868.622	402271	20.6786	13.4181	0.757458	1.79588	2.12045	0.17477	1.98055	0.934022	1038.34	18.9942	1043.96	13.8307	1055.77	15.2724	1055.77	15.2724
	EC1505_Spot 113	506.439	829917	3.87789	13.4092	0.906575	1.74228	2.67179	0.169442	2.51328	0.940673	1009.03	23.4749	1024.31	17.2377	1057.1	18.2711	1057.1	18.2711
	EC1505_Spot 111	126.024	134875	3.37268	13.4061	1.05651	1.80664	3.04826	0.175661	2.85931	0.938015	1043.22	27.5406	1047.86	19.9261	1057.57	21.2832	1057.57	21.2832
	EC1505_Spot 11	378.665	56530.4	2.19508	13.3966	0.79984	1.80333	3.30678	0.175214	3.20859	0.970306	1040.78	30.8381	1046.66	21.6024	1058.99	16.1182	1058.99	16.1182
	EC1505_Spot 38	1291.16	287331	12.6179	13.3698	1.05305	1.646	3.48243	0.159607	3.3194	0.953185	954.594	29.4526	988.019	21.9999	1063.03	21.2024	1063.03	21.2024
	EC1505_Spot 97	201.468	15959.4	1.07502	13.3695	0.751769	1.75575	3.41508	0.170246	3.33131	0.97547	1013.47	31.2418	1029.28	22.0964	1063.07	15.1082	1063.07	15.1082
	EC1505_Spot 30	664.712	145787	3.58146	13.353	0.794702	1.83305	4.34016	0.177521	4.26679	0.983093	1053.42	41.4673	1057.37	28.5213	1065.56	15.968	1065.56	15.968
	EC1505_Spot 112	232.727	21272.9	2.62525	13.3354	0.964863	1.76843	3.17817	0.171038	3.02816	0.952802	1017.83	28.5116	1033.94	20.6167	1068.2	19.3942	1068.2	19.3942
	EC1505_Spot 42	825.972	254866	2.02806	13.3337	0.956085	1.83626	2.4156	0.177575	2.21834	0.918339	1053.72	21.5646	1058.52	15.881	1068.46	19.2167	1068.46	19.2167
	EC1505_Spot 117	331.319	73218.1	1.79386	13.3101	1.01468	1.841	2.64944	0.177719	2.44744	0.923757	1054.5	23.8081	1060.22	17.4345	1072.03	20.3653	1072.03	20.3653
	EC1505_Spot 47	221.76	195634	2.08223	13.3021	0.830382	1.86478	2.89298	0.179907	2.77124	0.95792	1066.47	27.2392	1068.68	19.1233	1073.23	16.6725	1073.23	16.6725
	EC1505_Spot 64	291.453	35503	2.13781	13.2619	1.21026	1.93803	2.65405	0.186409	2.36205	0.889978	1101.89	23.9244	1094.32	17.7782	1079.29	24.2709	1079.29	24.2709
	EC1505_Spot 13	336.952	107953	2.86623	13.2001	0.837693	1.85096	3.32346	0.177204	3.21615	0.967713	1051.68	31.209	1063.77	21.9126	1088.65	16.7871	1088.65	16.7871
	EC1505_Spot 110	121.952	22599.3	1.878	13.1189	0.922863	1.86274	3.24346	0.177234	3.1094	0.958667	1051.85	30.1775	1067.96	21.4325	1100.99	18.47	1100.99	18.47
	EC1505_Spot 69	101.029	14970.8	2.06553	13.0969	1.35917	1.73554	3.65624	0.164854	3.39422	0.928337	983.698	30.9664	1021.81	23.5577	1104.38	27.1768	1104.38	27.1768
	EC1505_Spot 31	642.373	92144.1	2.8178	13.0829	0.875435	1.84832	3.53829	0.175379	3.42828	0.968909	1041.68	32.976	1062.83	23.3178	1106.51	17.4964	1106.51	17.4964
	EC1505_Spot 86	138.663	39798.3	2.42928	13.0803	0.849958	1.96865	2.78878	0.18676	2.6561	0.952424	1103.8	26.9455	1104.84	18.7803	1106.9	16.9768	1106.9	16.9768
	EC1505_Spot 10	38.4201	21845.4	1.86733	13.0531	1.09613	1.94878	3.71812	0.18449	3.55287	0.955557	1091.46	35.6734	1098.03	24.9552	1111.05	21.8862	1111.05	21.8862
	EC1505_Spot 66	670.77	152248	2.32629	13.0488	0.8088	1.85096	2.66677	0.175173	2.54116	0.952899	1040.55	24.4184	1063.77	17.5819	1111.7	16.1523	1111.7	16.1523
	EC1505_Spot 24	1621.06	1.75504e+06	1.49218	13.0319	0.949684	2.05434	2.3647	0.194168	2.16562	0.915811	1143.91	22.6993	1133.74	16.1509	1114.29	18.9588	1114.29	18.9588
	EC1505_Spot 76	308.301	27905.7	9.21032	13.0239	0.897117	2.01583	2.56244	0.190411	2.40026	0.936711	1123.6	24.75	1120.86	17.3929	1115.52	17.8974	1115.52	17.8974
	EC1505_Spot 84	706.285	108112	5.53961	13.0093	1.22703	1.96602	5.66382	0.185499	5.52931	0.976251	1096.95	55.775	1103.94	38.1379	1117.78	24.4671	1117.78	24.4671
	EC1505_Spot 104	333.237	50832.6	2.39337	12.9827	0.888207	2.0527	1.93231	0.193282	1.71608	0.888095	1139.13	17.9186	1133.19	13.1939	1121.85	17.7015	1121.85	17.7015
	EC1505_Spot 17	339.47	50464.5	3.78239	12.9474	0.885935	1.94263	2.94933	0.18242	2.81313	0.953818	1080.18	27.9776	1095.91	19.7726	1127.26	17.6706	1127.26	17.6706
	EC1505_Spot 75	169.542	30372.9	1.94565	12.8452	0.941751	1.96714	3.49219	0.183264	3.36281	0.962952	1084.78	33.5752	1104.33	23.5127	1143.06	18.702	1143.06	18.702
	EC1505_Spot 54	232.096	108969	1.35075	12.8435	0.889206	2.05155	3.08725	0.191102	2.95643	0.957623	1127.34	30.5776	1132.81	21.0779	1143.33	17.6571	1143.33	17.6571
	EC1505_Spot 102	507.941	28199.8	0.692528	12.8136	0.88349	1.94178	2.13695	0.180455	1.94576	0.910533	1069.46	19.1747	1095.61	14.3233	1147.94	17.5503	1147.94	17.5503
	EC1505_Spot 7	187.529	876667	2.91379	12.8014	1.043	1.94386	3.73439	0.180477	3.58578	0.960205	1069.58	35.3403	1096.33	25.0429	1149.82	20.7178	1149.82	20.7178
	EC1505_Spot 9	292.057	31739.2	1.47863	12.8012	0.914422	1.96676	3.27842	0.1826	3.14831	0.960314	1081.17	31.3374	1104.2	22.0715	1149.84	18.1464	1149.84	18.1464
	EC1505_Spot 103	72.1497	19953.8	2.56024	12.7399	1.1633	1.76159	4.10411	0.162768	3.93579	0.958988	972.138	35.5165	1031.43	26.5885	1159.38	23.0693	1159.38	23.0693
	EC1505_Spot 105	256.661	44624.9	2.29739	12.6585	0.759681	2.10221	2.66702	0.193	2.55654	0.958574	1137.61	26.6618	1149.53	18.3531	1172.11	15.0557	1172.11	15.0557
	EC1505_Spot 115	89.6584	29830.7	1.81779	12.6463	0.802504	2.13273	2.84808	0.195612	2.73269	0.959482	1151.71	28.8215	1159.47	19.6902	1174.02	15.8993	1174.02	15.8993
	EC1505_Spot 44	211.704	2.60968e+06	1.98299	12.5987	0.968646	2.14847	2.77863	0.196316	2.60432	0.937269	1155.5	27.5502	1164.56	19.2549	1181.47	19.1654	1181.47	19.1654
	EC1505_Spot 73	83.7302	102899	1.73646	12.4342	1.13674	2.3642	3.36184	0.213206	3.16383	0.941099	1245.88	35.8427	1231.85	23.9933	1207.41	22.3857	1207.41	22.3857
	EC1505_Spot 19	917.958	14953.4	2.01961	12.346	0.734682	2.12506	3.58731	0.190281	3.51127	0.978804	1122.9	36.1854	1156.98	24.7741	1221.4	14.4391	1221.4	14.4391
	EC1505_Spot 37	225.954	57165.7	3.18487	12.1304	0.950855	2.39119	2.91834	0.210371	2.75909	0.945432	1230.79	30.914	1239.97	20.8973	1255.96	18.5772	1255.96	18.5772
	EC1505_Spot 99	207.435	19936.8	3.09337	12.0869	1.41266	2.47842	3.70469	0.217264	3.42478	0.924445	1267.4	39.4057	1265.75	26.8087	1262.94	27.5814	1262.94	27.5814
	EC1505_Spot 55	722.924	148766	23.696	12.0768	1.18763	2.43459	3.71705	0.213243	3.52222	0.947583	1246.07	39.9086	1252.88	26.7596	1264.58	23.1972	1264.58	23.1972
	EC1505_Spot 78	175.46	25997.9	3.41284	12.0611	0.82065	2.42429	3.25221	0.212066	3.14697	0.96764	1239.81	35.4943	1249.83	23.3829	1267.14	16.0065	1267.14	16.0065
	EC1505_Spot 108	321.291	76441.1	1.66084	11.9564	0.663606	2.43705	2.76976	0.211331	2.68909	0.970874	1235.9	30.2432	1253.6	19.9438	1284.11	12.9075	1284.11	12.9075
	EC1505_Spot 52	470.495	64380.3	3.05776	11.6119	1.82072	2.47782	3.61312	0.208675	3.12083	0.863751	1221.75	34.7339	1265.58	26.1439	1340.83	35.184	1340.83	35.184
	EC1505_Spot 58	304.238	36728.5	3.57685	11.5305	0.936039	2.37203	3.33615	0.198365	3.20214	0.959832	1166.53	34.1695	1234.21	23.8333	1354.42	18.0536	1354.42	18.0536
	EC1505_Spot 95	229.278	18864.2	3.52964	11.4227	0.859031	2.83648	3.06792	0.234988	2.9452	0.959999	1360.59	36.126	1365.24	23.0353	1372.51	16.5263	1372.51	16.5263
	EC1505_Spot 18	73.2015	90675.1	1.43072	11.3922	0.918313	2.86958	3.87952	0.237097	3.76927	0.971581	1371.59	46.57	1373.96	29.2202	1377.64	17.6544	1377.64	17.6544
	EC1505_Spot 36	114.836	16838.7	3.74802	10.6221	0.955458	3.41116	3.67199	0.262792	3.54551	0.965554	1504.11	47.5648	1506.97	28.8402	1510.97	18.0381	1510.97	18.0381
	EC1505_Spot 101	695.94	475359	5.94423	10.3278	0.735335	3.4651	2.4196	0.25955	2.30516	0.952702	1487.54	30.6216	1519.31	19.0682	1563.84	13.7852	1563.84	13.7852
	EC1505_Spot 40	75.2349	360842	1.1059	9.36072	1.00999	4.57313	4.09038	0.310471	3.96373	0.969036	1743.03	60.5381	1744.38	34.0935	1746	18.4988	1746	18.4988
	EC1505_Spot 93	97.4671	17641.9	1.01772	9.12059	1.11199	4.81539	3.98688	0.318532	3.82866	0.960316	1782.56	59.6266	1787.59	33.5331	1793.45	20.2479	1793.45	20.2479
	EC1505_Spot 88	171.361	490262	0.521283	8.41709	0.793702	5.73172	3.67082	0.349902	3.58398	0.976345	1934.13	59.8881	1936.16	31.7463	1938.33	14.2012	1938.33	14.2012
	EC1505_Spot 77	203.422	167245	3.00646	7.93264	0.778939	6.36393	3.94934	0.366136	3.87176	0.980357	2011.19	66.8945	2027.31	34.6688	2043.74	13.7672	2043.74	13.7672
	EC1505_Spot 14	109.467	27164.7	2.99139	7.82939	1.13535	6.46202	4.11809	0.36694	3.95849	0.961244	2014.98	68.503	2040.74	36.2262	2066.87	20.0149	2066.87	20.0149
	EC1505_Spot 79	113.674	34135.2	2.40941	7.26503	0.813441	7.84063	3.44426	0.41313	3.34682	0.971711	2229.22	63.0768	2212.88	31.0262	2197.78	14.1313	2197.78	14.1313
	EC1505_Spot 85	372.565	496261	1.55649	5.56357	0.724874	11.5107	2.76741	0.464467	2.67079	0.965086	2459.25	54.6063	2565.45	25.8593	2650.46	12.0232	2650.46	12.0232
4	EC1509
	EC1509_Spot 61	661.72	40	1.83369	4.91717	74.785	0.000589258	78.3452	2.10237e-05	23.3488	0.298025	0.135526	0.0316434	0.598147	0.468481	NA	NA	0.135526	0.0316434
	EC1509_Spot 33	496.177	40	2.53709	4.92647	24.6185	0.000626292	29.706	2.23872e-05	16.6246	0.559639	0.144316	0.0239917	0.635727	0.18879	NA	NA	0.144316	0.0239917
	EC1509_Spot 39	369.273	40	3.11286	2	1.79605	0.00164465	30.1817	2.38667e-05	30.1282	0.998228	0.153853	0.0463525	1.66858	0.503193	4241.2	NA	0.153853	0.0463525
	EC1509_Spot 42	445.556	40	2.89698	15.7382	8.41767	0.000214118	20.8242	2.4451e-05	19.0471	0.914659	0.157619	0.0300215	0.217388	0.0452646	726.318	178.772	0.157619	0.0300215
	EC1509_Spot 81	591.463	40	1.85294	17.6112	163.932	0.000193924	165.071	2.47804e-05	19.3545	0.11725	0.159743	0.0309171	0.196888	0.324973	483.095	NA	0.159743	0.0309171
	EC1509_Spot 112	423.076	40	2.28672	31.549	31.6417	0.000110932	39.8426	2.5394e-05	24.2123	0.607698	0.163698	0.0396345	0.112633	0.0448732	NA	NA	0.163698	0.0396345
	EC1509_Spot 21	358.485	40	2.55852	21.4422	18.7567	0.000183307	27.0369	2.8519e-05	19.4726	0.720223	0.183843	0.0357985	0.186109	0.0503136	30.6846	452.863	0.183843	0.0357985
	EC1509_Spot 67	334.195	40	3.62495	8.83112	25.1875	0.000448333	30.1146	2.87279e-05	16.5069	0.548138	0.185189	0.0305686	0.455127	0.137029	1851.97	463.117	0.185189	0.0305686
	EC1509_Spot 71	335.447	40	3.28161	4.96584	6.02949	0.000798363	24.6016	2.87661e-05	23.8513	0.969502	0.185435	0.0442281	0.81032	0.199273	2837.37	98.4082	0.185435	0.0442281
	EC1509_Spot 89	373.683	40	2.46842	4.92254	48.1371	0.000809409	51.9081	2.89098e-05	19.4234	0.374189	0.186362	0.0361974	0.821528	0.426267	NA	NA	0.186362	0.0361974
	EC1509_Spot 34	356.513	40	3.22148	4.92514	50	0.000825491	53.4024	2.94998e-05	18.7568	0.351235	0.190165	0.0356684	0.837844	0.447245	NA	NA	0.190165	0.0356684
	EC1509_Spot 36	264.451	40	3.389	4.92804	50	0.00082867	55.0964	2.96308e-05	23.1433	0.420052	0.19101	0.0442054	0.841069	0.463207	NA	NA	0.19101	0.0442054
	EC1509_Spot 17	294.496	40	3.20675	6.67443	3.25609	0.000627376	18.1248	3.03829e-05	17.8299	0.983731	0.195858	0.0349208	0.636827	0.115387	2343.92	55.7052	0.195858	0.0349208
	EC1509_Spot 37	401.146	40	2.87735	2	77.8501	0.00212919	81.0544	3.08981e-05	22.5648	0.278391	0.199179	0.0449437	2.15964	1.74863	4241.2	NA	0.199179	0.0449437
	EC1509_Spot 38	692.78	40	1.87829	4.43007	24.1791	0.000967397	29.8363	3.10959e-05	17.4807	0.585887	0.200454	0.0350402	0.981804	0.292792	3022.01	394.613	0.200454	0.0350402
	EC1509_Spot 19	277.907	40	2.32733	15.4349	163.137	0.000279562	164.91	3.1309e-05	24.1133	0.146221	0.201828	0.0486665	0.283822	0.467985	767.447	NA	0.201828	0.0486665
	EC1509_Spot 11	558.272	40	2.22456	13.7673	46.3147	0.000314093	50.1205	3.13757e-05	19.1577	0.382233	0.202258	0.0387473	0.318875	0.159796	1003.8	994.77	0.202258	0.0387473
	EC1509_Spot 31	364.656	40	2.5167	5.96834	50	0.000726166	52.1586	3.14468e-05	14.8498	0.284705	0.202716	0.0301024	0.737069	0.384305	2533.31	NA	0.202716	0.0301024
	EC1509_Spot 4	292.759	40	3.16702	4.9278	15.8425	0.000883927	23.7281	3.16051e-05	17.6646	0.744459	0.203736	0.0359886	0.897128	0.212777	NA	NA	0.203736	0.0359886
	EC1509_Spot 58	252.825	40	3.20131	4.91896	39.126	0.000888455	44.3457	3.171e-05	20.8735	0.470699	0.204413	0.0426674	0.901721	0.399697	NA	NA	0.204413	0.0426674
	EC1509_Spot 5	303.209	40	3.46091	2.17453	51.5536	0.00204388	56.3698	3.22485e-05	22.7988	0.40445	0.207884	0.0473942	2.07321	1.16747	4117.46	NA	0.207884	0.0473942
	EC1509_Spot 46	225.906	40	3.61575	2	1.70144	0.00233113	24.3589	3.38287e-05	24.2994	0.997558	0.21807	0.0529889	2.36424	0.575234	NA	NA	0.21807	0.0529889
	EC1509_Spot 104	229.024	40	3.37423	4.99547	24.4797	0.000935319	35.2978	3.39019e-05	25.4299	0.720438	0.218542	0.055574	0.949263	0.334913	2827.67	406.424	0.218542	0.055574
	EC1509_Spot 54	320.974	40	2.85967	2	12.0944	0.00234077	26.8458	3.39685e-05	23.9671	0.892769	0.218971	0.0524802	2.374	0.636575	4241.2	NA	0.218971	0.0524802
	EC1509_Spot 90	241.636	40	3.49301	2	1.16367	0.00234744	21.6437	3.40653e-05	21.6124	0.998554	0.219595	0.0474589	2.38076	0.514679	4241.2	NA	0.219595	0.0474589
	EC1509_Spot 43	207.355	40	2.9618	8.93019	33.5929	0.000528814	40.0594	3.42651e-05	21.8236	0.544781	0.220883	0.0482037	0.536807	0.214985	1831.78	627.822	0.220883	0.0482037
	EC1509_Spot 120	292.216	40	2.65395	2.78451	25.93	0.00175473	34.1589	3.54525e-05	22.2366	0.650976	0.228538	0.0508182	1.78016	0.607551	3746.18	402.131	0.228538	0.0508182
	EC1509_Spot 22	343.077	40	2.82743	4.18345	7.90953	0.00117253	18.0328	3.55916e-05	16.2055	0.898673	0.229434	0.0371804	1.18987	0.214441	3113.56	126.173	0.229434	0.0371804
	EC1509_Spot 82	1965.12	203.468	1.08262	6.4807	19.4517	0.000760647	21.408	3.57678e-05	8.94044	0.417622	0.23057	0.0206136	0.772054	0.165218	2394.17	334.434	0.23057	0.0206136
	EC1509_Spot 95	253.317	40	3.3646	6.01405	12.0045	0.000855831	20.3575	3.73459e-05	16.4414	0.807634	0.240743	0.0395808	0.868624	0.176755	2520.5	202.464	0.240743	0.0395808
	EC1509_Spot 25	301.39	40	2.01984	13.3924	63.5548	0.000384513	66.1844	3.73643e-05	18.4704	0.279076	0.240861	0.0444873	0.390353	0.258303	1059.63	NA	0.240861	0.0444873
	EC1509_Spot 110	337.32	40	2.65032	6.6486	41.728	0.000786546	45.8098	3.79439e-05	18.9026	0.412632	0.244598	0.0462344	0.798332	0.36557	2350.55	750.679	0.244598	0.0462344
	EC1509_Spot 51	348.869	40	2.66908	4.92087	39.7509	0.00107285	42.9704	3.83062e-05	16.3193	0.37978	0.246933	0.0402969	1.08877	0.467598	NA	NA	0.246933	0.0402969
	EC1509_Spot 66	240.711	40	1.8491	4.76941	11.9908	0.00111575	24.9562	3.86117e-05	21.8868	0.877008	0.248902	0.0544757	1.13228	0.282417	2902.98	195.163	0.248902	0.0544757
	EC1509_Spot 91	207.27	40	3.53037	4.92414	5.61442	0.00110892	21.239	3.96203e-05	20.4835	0.964428	0.255404	0.0523146	1.12535	0.238882	NA	NA	0.255404	0.0523146
	EC1509_Spot 40	193.222	40	3.54381	206.419	27.6725	2.70533e-05	38.4194	4.05189e-05	26.6511	0.69369	0.261197	0.0696103	0.0274691	0.0105533	NA	NA	0.261197	0.0696103
	EC1509_Spot 49	203.424	40	3.15875	4.92394	6.97342	0.00113886	20.6816	4.06884e-05	19.4705	0.94144	0.262289	0.0510679	1.15572	0.238886	NA	NA	0.262289	0.0510679
	EC1509_Spot 83	497.325	40	1.39135	4.91992	7.95608	0.00114058	17.6046	4.07166e-05	15.7043	0.892053	0.262471	0.0412183	1.15747	0.203652	NA	NA	0.262471	0.0412183
	EC1509_Spot 114	261.526	40	3.23212	31.5912	44.0457	0.000178044	48.8494	4.08115e-05	21.1243	0.432437	0.263082	0.0555731	0.180767	0.0882957	NA	NA	0.263082	0.0555731
	EC1509_Spot 60	288.21	171.752	3.0414	3.79638	28.8264	0.00149415	35.4202	4.11577e-05	20.5822	0.581088	0.265314	0.0546065	1.516	0.536571	3267.21	464.809	0.265314	0.0546065
	EC1509_Spot 85	186.382	40	3.15103	2.05955	50.2509	0.00277043	56.8989	4.14007e-05	26.6895	0.46907	0.26688	0.0712276	2.80916	1.59617	4197.89	NA	0.26688	0.0712276
	EC1509_Spot 32	192.316	40	3.96351	18.2472	235.629	0.000314716	236.937	4.1668e-05	24.8673	0.104953	0.268604	0.0667931	0.319507	0.756911	404.169	NA	0.268604	0.0667931
	EC1509_Spot 23	160.044	40	2.56458	10.9997	10.308	0.000536646	29.2053	4.28307e-05	27.3257	0.935642	0.276099	0.0754443	0.544755	0.159055	1444.74	196.872	0.276099	0.0754443
	EC1509_Spot 102	226.332	40	2.50185	2	3.90017	0.00302518	19.5909	4.39005e-05	19.1988	0.979983	0.282994	0.0543303	3.06708	0.599963	NA	NA	0.282994	0.0543303
	EC1509_Spot 98	260.045	40	2.78438	7.94612	38.4571	0.000778832	48.286	4.49041e-05	29.1992	0.604714	0.289464	0.0845195	0.790505	0.381555	2040.74	709.001	0.289464	0.0845195
	EC1509_Spot 113	212.769	40	3.182	2.51048	88.9666	0.00248161	91.0139	4.52042e-05	19.1959	0.210912	0.291398	0.0559353	2.51666	2.28768	3902.79	NA	0.291398	0.0559353
	EC1509_Spot 1	157.866	40	3.64129	4.93271	29.5643	0.00126546	34.5141	4.52919e-05	17.8094	0.516004	0.291964	0.0519958	1.28411	0.442919	NA	NA	0.291964	0.0519958
	EC1509_Spot 2	156.598	40	3.57425	3.65024	11.2292	0.00171205	22.8892	4.53447e-05	19.9455	0.871392	0.292304	0.0583001	1.7369	0.397224	3328.8	176.433	0.292304	0.0583001
	EC1509_Spot 101	203.71	40	2.90223	4.92475	50.6251	0.00127099	53.1713	4.54167e-05	16.2566	0.30574	0.292768	0.0475931	1.28973	0.685328	NA	NA	0.292768	0.0475931
	EC1509_Spot 109	272.957	179.124	2.42034	2.1792	47.7805	0.00287375	54.4637	4.54396e-05	26.1404	0.479959	0.292916	0.0765675	2.91377	1.58467	NA	NA	0.292916	0.0765675
	EC1509_Spot 105	153.687	40	4.1843	2.51048	21.2671	0.00249773	25.1623	4.54977e-05	13.4482	0.534459	0.293291	0.0394415	2.53299	0.636565	3902.79	324.308	0.293291	0.0394415
	EC1509_Spot 7	238.918	40	2.36665	4.92667	62.9821	0.00127329	66.0047	4.55167e-05	19.7453	0.29915	0.293413	0.0579339	1.29206	0.852278	NA	NA	0.293413	0.0579339
	EC1509_Spot 108	174.773	40	3.46565	4.92643	16.6682	0.0012766	26.7232	4.56324e-05	20.8877	0.781634	0.294159	0.0614417	1.29541	0.345953	NA	NA	0.294159	0.0614417
	EC1509_Spot 68	160.995	40	3.48024	4.91408	48.3558	0.00128736	50.4306	4.59018e-05	14.3166	0.283887	0.295895	0.0423612	1.30632	0.658362	NA	NA	0.295895	0.0423612
	EC1509_Spot 94	263.564	728.795	3.82724	7.55193	9.27075	0.000874764	29.3314	4.79332e-05	27.8277	0.948736	0.30899	0.0859828	0.887832	0.2603	2130.24	162.637	0.30899	0.0859828
	EC1509_Spot 44	223.767	40	2.95464	2	1.92756	0.00335465	17.4883	4.86817e-05	17.3817	0.993907	0.313815	0.0545451	3.40056	0.593705	4241.2	NA	0.313815	0.0545451
	EC1509_Spot 115	309.689	167.033	2.18643	2.83043	15.6473	0.0023864	27.4295	4.90099e-05	22.5287	0.821329	0.31593	0.0711731	2.42023	0.663067	3721.3	239.904	0.31593	0.0711731
	EC1509_Spot 12	249.352	40	3.38332	8.32296	42.4222	0.000812143	49.2533	4.90454e-05	25.025	0.508087	0.316159	0.0791169	0.824302	0.405831	1958.43	797.184	0.316159	0.0791169
	EC1509_Spot 45	419.977	1274.91	1.93009	3.19948	31.8588	0.00212159	37.9782	4.92527e-05	20.6728	0.544333	0.317495	0.0656335	2.15195	0.816406	3533.55	506.73	0.317495	0.0656335
	EC1509_Spot 3	239.945	40	2.31107	4.9278	100.888	0.00138302	102.862	4.94505e-05	20.0551	0.194971	0.318771	0.063928	1.40333	1.44249	NA	NA	0.318771	0.063928
	EC1509_Spot 107	127.913	40	3.91259	6.93811	131.856	0.000991859	133.562	4.9932e-05	21.2805	0.15933	0.321874	0.0684948	1.00662	1.3438	2277.42	NA	0.321874	0.0684948
	EC1509_Spot 63	188.485	40	3.00726	4.91541	50	0.00140792	58.5171	5.02142e-05	30.4015	0.519531	0.323693	0.098405	1.42857	0.835373	NA	NA	0.323693	0.098405
	EC1509_Spot 93	194.043	40	3.34667	13.2048	58.6382	0.000528106	65.3884	5.05988e-05	28.9344	0.4425	0.326173	0.0943736	0.536088	0.350447	1087.96	NA	0.326173	0.0943736
	EC1509_Spot 26	266.648	40	3.636	2.12838	2.92402	0.00329393	21.653	5.08688e-05	21.4547	0.99084	0.327913	0.0703509	3.3391	0.721829	4149.27	43.3416	0.327913	0.0703509
	EC1509_Spot 53	281.976	170.887	3.04058	8.04524	16.4255	0.000873956	27.2482	5.10172e-05	21.7409	0.797885	0.328869	0.0714973	0.887013	0.241589	2018.79	293.247	0.328869	0.0714973
	EC1509_Spot 47	310.591	40	3.1049	4.92204	1.42266	0.00146426	36.7269	5.22939e-05	36.6993	0.999249	0.3371	0.12371	1.4857	0.545251	NA	NA	0.3371	0.12371
	EC1509_Spot 57	218.84	40	3.06266	50.1652	1223.49	0.000151411	1223.59	5.51121e-05	15.2647	0.0124754	0.355266	0.0542287	0.153728	1.88086	NA	NA	0.355266	0.0542287
	EC1509_Spot 18	113.065	40	3.09069	2.53591	5.73859	0.00306307	28.4407	5.6361e-05	27.8557	0.979432	0.363316	0.101202	3.10543	0.881858	3887.62	86.4817	0.363316	0.101202
	EC1509_Spot 64	102.76	40	4.67603	4.91542	103.037	0.00158487	105.561	5.65251e-05	22.9478	0.217388	0.364374	0.0836133	1.60798	1.69605	NA	NA	0.364374	0.0836133
	EC1509_Spot 74	544.526	40	1.47375	4.91822	14.3135	0.00159428	52.0084	5.6893e-05	50	0.961383	0.366745	0.183367	1.61751	0.840573	NA	NA	0.366745	0.183367
	EC1509_Spot 29	123.867	40	3.38222	2	18.2012	0.00396659	24.0465	5.75619e-05	15.7146	0.653511	0.371057	0.0583086	4.01964	0.964672	4241.2	NA	0.371057	0.0583086
	EC1509_Spot 13	105.953	40	4.10642	19.9008	32.4758	0.000416145	40.1685	6.009e-05	23.6397	0.588512	0.387353	0.0915662	0.422459	0.16966	206.567	771.424	0.387353	0.0915662
	EC1509_Spot 16	164.859	40	3.13216	4.92702	5.23004	0.00177929	40.046	6.36089e-05	39.703	0.991435	0.410036	0.162792	1.80505	0.722209	NA	NA	0.410036	0.162792
	EC1509_Spot 55	173.602	40	3.34165	28.377	24.1465	0.000318707	29.8069	6.56212e-05	17.4757	0.586296	0.423008	0.0739211	0.323558	0.0964272	NA	NA	0.423008	0.0739211
	EC1509_Spot 99	378.524	40	1.42067	4.92476	38.7798	0.00192351	43.5322	6.87334e-05	19.7782	0.454335	0.443068	0.087628	1.95122	0.848595	NA	NA	0.443068	0.087628
	EC1509_Spot 88	210.531	40	2.91525	4.92256	5.38797	0.0019812	24.283	7.0763e-05	23.6777	0.975074	0.456152	0.108003	2.00968	0.48753	NA	NA	0.456152	0.108003
	EC1509_Spot 118	478.42	177.021	2.55899	2.1833	8.73376	0.00450257	28.2701	7.13284e-05	26.8871	0.951082	0.459796	0.123622	4.56158	1.28667	NA	NA	0.459796	0.123622
	EC1509_Spot 77	94.001	40	4.08183	12.1494	34.6198	0.0008172	40.5634	7.20395e-05	21.139	0.521136	0.46438	0.0981619	0.829433	0.336309	1252.85	698.563	0.46438	0.0981619
	EC1509_Spot 8	131.738	199.039	4.23299	24.255	15.049	0.000416429	24.8034	7.32877e-05	19.7164	0.794908	0.472425	0.093142	0.422747	0.104834	NA	NA	0.472425	0.093142
	EC1509_Spot 6	235.768	40	1.15065	2	8.36332	0.00518061	14.0987	7.51793e-05	11.3502	0.805057	0.484619	0.0550034	5.24672	0.737811	4241.2	NA	0.484619	0.0550034
	EC1509_Spot 103	95.9489	40	3.82142	14.0837	29.3466	0.00075337	34.032	7.6986e-05	17.2322	0.506354	0.496265	0.0855141	0.764671	0.260135	957.516	612.683	0.496265	0.0855141
	EC1509_Spot 79	172.216	686.699	3.65684	5.09368	4.55644	0.0020971	19.9441	7.75064e-05	19.4166	0.973553	0.499619	0.0970055	2.12713	0.423792	2795.84	74.6132	0.499619	0.0970055
	EC1509_Spot 35	453.974	40	1.15352	4.92806	83.357	0.00221306	84.0289	7.91328e-05	10.6048	0.126204	0.510103	0.054093	2.24462	1.88405	NA	NA	0.510103	0.054093
	EC1509_Spot 119	83.9161	40	4.11311	4.93011	100.943	0.00234225	102.715	8.37871e-05	18.9941	0.184921	0.540104	0.102583	2.3755	2.43714	NA	NA	0.540104	0.102583
	EC1509_Spot 73	116.399	908.602	3.42989	3.98405	6.54219	0.00313088	16.5938	9.05063e-05	15.2497	0.919001	0.583415	0.0889648	3.17408	0.525877	3191.08	103.647	0.583415	0.0889648
	EC1509_Spot 65	490.348	40	2.58055	2.17282	18.1513	0.00590516	19.8736	9.30987e-05	8.09265	0.407206	0.600125	0.0485638	5.97836	1.18462	4118.62	1934.57	0.600125	0.0485638
	EC1509_Spot 117	150.932	40	1.84971	5.46377	12.2073	0.00240047	23.1634	9.5165e-05	19.6856	0.849859	0.613444	0.120755	2.43448	0.563233	2680.45	202.765	0.613444	0.120755
	EC1509_Spot 50	182.189	40	3.07164	4.92358	100.349	0.00269336	102.175	9.62195e-05	19.2333	0.188238	0.620241	0.119287	2.73111	2.78678	NA	NA	0.620241	0.119287
	EC1509_Spot 106	233.48	40	1.93331	4.61763	107.616	0.00288745	108.35	9.67432e-05	12.5923	0.116218	0.623617	0.0785238	2.92764	3.16755	2955.29	NA	0.623617	0.0785238
	EC1509_Spot 41	146.079	40	3.61171	4.9216	17.6993	0.00280473	29.3025	0.000100158	23.3532	0.796968	0.645627	0.150767	2.84389	0.832165	NA	NA	0.645627	0.150767
	EC1509_Spot 59	137.837	40	3.34824	4.91891	11.6411	0.00283966	21.9521	0.00010135	18.6113	0.847813	0.65331	0.121583	2.87926	0.631162	NA	NA	0.65331	0.121583
	EC1509_Spot 62	176.42	40	4.07043	4.91719	38.5632	0.00284703	44.6377	0.000101577	22.4813	0.503639	0.654777	0.147195	2.88672	1.28674	NA	NA	0.654777	0.147195
	EC1509_Spot 9	126.024	40	4.15003	4.92364	20.6197	0.00287689	27.5863	0.000102777	18.3256	0.664303	0.662512	0.121403	2.91696	0.803525	NA	NA	0.662512	0.121403
	EC1509_Spot 10	97.6486	231.609	3.22592	2.884	19.4059	0.00511421	31.8637	0.000107019	25.2726	0.793149	0.689854	0.174335	5.17965	1.64623	3692.74	299.288	0.689854	0.174335
	EC1509_Spot 14	72.8649	40	2.47687	5.12507	27.8031	0.00310954	31.1329	0.000115633	14.0087	0.449966	0.745378	0.104412	3.15248	0.979935	2785.79	465.734	0.745378	0.104412
	EC1509_Spot 116	180.743	40	3.31698	4.93013	97.1038	0.00344661	103.913	0.000123293	36.9974	0.356041	0.794749	0.294018	3.49362	3.6241	NA	NA	0.794749	0.294018
	EC1509_Spot 97	130.158	40	4.14871	4.92441	38.8667	0.00357412	49.6152	0.000127706	30.8391	0.621564	0.823193	0.253849	3.62263	1.79418	NA	NA	0.823193	0.253849
	EC1509_Spot 76	253.706	169.41	2.03895	6.93816	20.0201	0.00257544	23.3157	0.000129653	11.9505	0.512552	0.835745	0.0998693	2.6117	0.608153	2277.41	348.627	0.835745	0.0998693
	EC1509_Spot 69	298.989	40	3.20049	4.91411	23.3993	0.00382616	30.219	0.000136426	19.1224	0.632792	0.879396	0.16815	3.8776	1.16954	NA	NA	0.879396	0.16815
	EC1509_Spot 75	157.304	309.231	2.8896	2.09502	50.0001	0.00950669	54.3446	0.000144513	21.2914	0.391784	0.93152	0.198319	9.60734	5.19649	NA	NA	0.93152	0.198319
	EC1509_Spot 30	381.427	781.649	2.21981	19.8913	11.0775	0.00102784	14.8122	0.000148346	9.83321	0.663857	0.956227	0.0940208	1.04311	0.154429	207.654	257.562	0.956227	0.0940208
	EC1509_Spot 111	327.681	240.923	2.2349	27.144	18.3014	0.000754008	20.6913	0.000148504	9.65334	0.466541	0.957246	0.0923993	0.765318	0.158295	NA	NA	0.957246	0.0923993
	EC1509_Spot 72	54.5828	40	3.07908	4.91484	25.0674	0.00445139	30.8535	0.000158742	17.9878	0.583009	1.02324	0.184044	4.50984	1.38836	NA	NA	1.02324	0.184044
	EC1509_Spot 56	302.929	266.782	2.49924	2.1118	4.17726	0.0114502	10.5231	0.00017545	9.65843	0.917835	1.13093	0.10922	11.5603	1.2096	NA	NA	1.13093	0.10922
	EC1509_Spot 96	182.378	40	2.29116	4.92383	0	0.00509454	17.8931	0.00018201	17.8931	1	1.17321	0.209904	5.15978	0.920904	NA	NA	1.17321	0.209904
	EC1509_Spot 48	75.132	255.186	4.32084	2.11923	50.0001	0.0123184	53.1883	0.000189417	18.138	0.341014	1.22094	0.221433	12.4315	6.57186	NA	NA	1.22094	0.221433
	EC1509_Spot 24	268.265	40	3.39156	2.12035	14.1153	0.0128859	31.7582	0.000198249	28.4489	0.895798	1.27787	0.363503	13.0005	4.10244	4154.87	210.371	1.27787	0.363503
	EC1509_Spot 86	199.801	40	2.20859	4.92261	103.648	0.00584756	104.446	0.000208861	12.889	0.123403	1.34627	0.173502	5.92023	6.16554	NA	NA	1.34627	0.173502
	EC1509_Spot 84	175.365	458.786	2.51148	2.06462	7.59245	0.0183189	35.7806	0.000274428	34.9658	0.977227	1.76884	0.618402	18.4324	6.53582	NA	NA	1.76884	0.618402
	EC1509_Spot 27	184.932	40	2.92602	4.92721	44.6082	0.00775038	58.7766	0.000277084	38.2726	0.651154	1.78595	0.683436	7.83926	4.58994	NA	NA	1.78595	0.683436
	EC1509_Spot 20	77.025	40	4.94555	4.92814	35.4909	0.00847463	39.9767	0.000303034	18.3991	0.460246	1.95319	0.359315	8.56874	3.4111	NA	NA	1.95319	0.359315
	EC1509_Spot 28	84.8923	40	2.90601	4.92877	0.435339	0.010646	9.32342	0.000380726	9.31325	0.998909	2.45385	0.22849	10.7526	0.997225	NA	NA	2.45385	0.22849
	EC1509_Spot 100	39.3231	40	2.70475	4.92494	102.442	0.0150945	111.316	0.000539394	43.5549	0.391272	3.47622	1.51366	15.2121	16.8089	NA	NA	3.47622	1.51366
	EC1509_Spot 80	36.9504	294.607	4.42759	2.09997	8.57668	0.0465023	22.5903	0.000708557	20.8989	0.925126	4.56603	0.953913	46.1526	10.193	NA	NA	4.56603	0.953913
	EC1509_Spot 92	112.919	181.177	4.20776	2.17594	2.71632	0.0625541	25.3605	0.00098762	25.2146	0.994247	6.36347	1.60373	61.6089	15.1609	NA	NA	6.36347	1.60373
	EC1509_Spot 78	74.2574	40	4.05639	4.91773	5.06817	0.080339	16.1913	0.00286667	15.3776	0.949747	18.4533	2.83362	78.4636	12.2264	NA	NA	18.4533	2.83362
	EC1509_Spot 52	53.6232	40	2.61158	4.92319	20.5993	0.23792	29.9147	0.00849894	21.6924	0.725142	54.5561	11.7846	216.716	58.4429	NA	NA	54.5561	11.7846
	EC1509_Spot 70	374.571	68980.5	8.72358	19.6446	1.23223	0.260937	3.1285	0.0371934	2.87561	0.919165	235.413	6.64745	235.421	6.57377	236.526	28.4427	235.413	6.64745
5	EC1608
	EC1608_Spot 77	236.704	214.513	2.05021	42.836	22.5747	0.00383851	22.8633	0.00119305	3.6212	0.158385	7.68632	0.278171	3.8901	0.887703	NA	NA	7.68632	0.278171
	EC1608_Spot 106	84.3126	244.752	2.7126	73.502	13.8037	0.00733302	14.0731	0.00391084	2.74028	0.194717	25.1617	0.688156	7.41866	1.04023	NA	NA	25.1617	0.688156
	EC1608_Spot 56	92.0217	515.391	2.14669	66.3747	24.7916	0.00832099	25.0316	0.00400742	3.45777	0.138136	25.7819	0.889697	8.41403	2.09746	NA	NA	25.7819	0.889697
	EC1608_Spot 27	118.237	693.222	2.08233	26.8421	6.33624	0.0211447	6.85942	0.00411819	2.62748	0.383047	26.493	0.69467	21.2461	1.44222	NA	NA	26.493	0.69467
	EC1608_Spot 26	135.298	1871.03	1.68755	31.3025	3.9595	0.0184505	4.80184	0.0041906	2.71663	0.565747	26.9579	0.730816	18.5636	0.883298	NA	NA	26.9579	0.730816
	EC1608_Spot 85	188.669	2118.32	1.84785	24.0408	4.37886	0.0241561	5.18287	0.00421371	2.77267	0.534969	27.1062	0.749989	24.2362	1.24126	NA	NA	27.1062	0.749989
	EC1608_Spot 49	140.118	724.869	2.09581	35.9751	7.42832	0.0173424	8.02317	0.00452688	3.03173	0.377872	29.1163	0.880737	17.4582	1.38873	NA	NA	29.1163	0.880737
	EC1608_Spot 87	156.938	524.981	2.2798	58.7794	46.681	0.0106901	46.7645	0.00455928	2.79233	0.0597106	29.3242	0.816971	10.797	5.02244	NA	NA	29.3242	0.816971
	EC1608_Spot 110	166.786	451.113	1.94348	24.9174	10.139	0.0256191	10.6085	0.00463185	3.12098	0.294195	29.7899	0.92759	25.6855	2.69068	NA	NA	29.7899	0.92759
	EC1608_Spot 6	258.097	702.144	2.42166	33.7484	32.8459	0.0189171	33.0294	0.00463228	3.4774	0.105282	29.7926	1.03362	19.0287	6.22661	NA	NA	29.7926	1.03362
	EC1608_Spot 5	214.561	1601.07	2.48381	23.2992	4.35357	0.0275902	5.03325	0.00466426	2.52588	0.501838	29.9978	0.755948	27.6351	1.37219	NA	NA	29.9978	0.755948
	EC1608_Spot 20	261.247	786.655	2.13616	32.1408	8.19008	0.0201522	8.56619	0.00469968	2.51042	0.293062	30.2251	0.757002	20.2588	1.71821	NA	NA	30.2251	0.757002
	EC1608_Spot 52	325.226	661.898	1.6509	40.8244	3.41598	0.0158869	4.69915	0.00470595	3.22693	0.686706	30.2653	0.974353	16.0045	0.746179	NA	NA	30.2653	0.974353
	EC1608_Spot 25	284.706	2189.3	1.89833	23.8396	8.44107	0.0273971	8.99167	0.00473906	3.09812	0.344555	30.4778	0.94201	27.4443	2.43465	NA	NA	30.4778	0.94201
	EC1608_Spot 1	290.404	26911	1.39402	20.6318	2.84976	0.0317621	3.87666	0.00475482	2.62819	0.677952	30.5789	0.801769	31.7492	1.21176	122.212	67.1638	30.5789	0.801769
	EC1608_Spot 113	99.5226	555.355	1.05985	45.9772	26.3183	0.014425	26.5019	0.00481224	3.11426	0.117511	30.9473	0.961469	14.5423	3.82654	NA	NA	30.9473	0.961469
	EC1608_Spot 105	278.238	5382.9	1.64187	22.1012	3.07391	0.0304207	3.77185	0.00487836	2.18584	0.579515	31.3715	0.684065	30.4282	1.13068	NA	NA	31.3715	0.684065
	EC1608_Spot 29	38.8975	618.019	3.19699	30.9501	6.83201	0.0218427	8.57955	0.00490519	5.18963	0.604884	31.5436	1.633	21.9399	1.86216	NA	NA	31.5436	1.633
	EC1608_Spot 28	209.274	703.401	1.92118	34.1984	8.16267	0.0205258	8.46584	0.00509323	2.24528	0.265216	32.7498	0.733459	20.6305	1.72893	NA	NA	32.7498	0.733459
	EC1608_Spot 103	236.142	1753.56	1.37789	26.3453	8.49133	0.0274527	8.84156	0.00524778	2.46383	0.278665	33.7409	0.829148	27.4993	2.39874	NA	NA	33.7409	0.829148
	EC1608_Spot 9	516.435	36769.3	2.5199	20.0464	2.0572	0.036748	3.70885	0.00534514	3.08602	0.832069	34.3652	1.0577	36.6441	1.33484	189.577	47.8497	34.3652	1.0577
	EC1608_Spot 117	205.09	2001.15	2.5124	24.5374	3.27329	0.0301162	4.32474	0.00536188	2.82647	0.653559	34.4726	0.971758	30.1281	1.28382	NA	NA	34.4726	0.971758
	EC1608_Spot 75	521.672	4261.21	1.44278	22.0822	2.048	0.0339277	3.46002	0.00543606	2.78881	0.806009	34.9482	0.972001	33.8781	1.15285	NA	NA	34.9482	0.972001
	EC1608_Spot 11	416.943	17906.9	2.23431	20.5592	1.97607	0.0373462	3.19143	0.00557111	2.50607	0.78525	35.814	0.895036	37.2298	1.16665	130.521	46.4831	35.814	0.895036
	EC1608_Spot 67	1371.73	5778	1.08776	22.4719	1.63958	0.0344908	3.33288	0.00562381	2.9017	0.870628	36.1519	1.04608	34.4309	1.1283	NA	NA	36.1519	1.04608
	EC1608_Spot 64	278.643	1038.07	1.75292	28.4863	4.4171	0.0275103	5.23567	0.00568616	2.81096	0.536886	36.5515	1.02454	27.5561	1.42335	NA	NA	36.5515	1.02454
	EC1608_Spot 66	140.923	1997.24	1.89092	23.6441	3.74891	0.0333647	5.23338	0.00572397	3.65156	0.697745	36.7939	1.33973	33.3251	1.71572	NA	NA	36.7939	1.33973
	EC1608_Spot 48	168.901	1717.75	1.73849	23.0689	3.30816	0.034918	4.49101	0.00584474	3.03731	0.676308	37.568	1.13774	34.8502	1.53857	NA	NA	37.568	1.13774
	EC1608_Spot 60	151.433	1245.41	1.5706	24.7504	3.93732	0.0339392	5.19823	0.00609497	3.39398	0.652912	39.1714	1.32544	33.8894	1.73258	NA	NA	39.1714	1.32544
	EC1608_Spot 22	127.788	603.622	2.29564	38.8676	11.3392	0.0216228	11.6483	0.00609799	2.66566	0.228845	39.1908	1.04153	21.7214	2.50332	NA	NA	39.1908	1.04153
	EC1608_Spot 78	203.287	1024.03	1.7604	30.6252	8.45624	0.0274615	8.74926	0.00610225	2.24532	0.256629	39.2181	0.877897	27.5079	2.37444	NA	NA	39.2181	0.877897
	EC1608_Spot 21	314.256	4615.4	1.52271	22.0245	2.21663	0.0387523	3.11008	0.00619287	2.18155	0.701444	39.7987	0.865553	38.6052	1.17811	NA	NA	39.7987	0.865553
	EC1608_Spot 30	533.157	10801.2	1.56895	20.7451	2.01646	0.0415954	3.1142	0.00626107	2.37321	0.762063	40.2356	0.951905	41.3805	1.26277	109.307	47.6072	40.2356	0.951905
	EC1608_Spot 63	387.736	5036.55	3.08957	21.538	2.33312	0.0432513	4.19504	0.00675915	3.48639	0.831075	43.4257	1.5089	42.9934	1.76594	19.9917	56.009	43.4257	1.5089
	EC1608_Spot 14	795.439	9392.24	1.85173	21.3253	1.67797	0.0446406	3.04454	0.00690738	2.5404	0.834413	44.3747	1.12342	44.3447	1.32103	43.7709	40.1155	44.3747	1.12342
	EC1608_Spot 91	1921.84	13583.1	1.95901	21.1284	1.10037	0.0712222	2.82279	0.0109187	2.59949	0.920892	70.0047	1.80992	69.8586	1.90566	65.917	26.1904	70.0047	1.80992
	EC1608_Spot 109	191.669	2143.67	3.12423	23.9283	4.58666	0.0635605	5.17579	0.0110354	2.3982	0.46335	70.7488	1.68742	62.5702	3.14075	NA	NA	70.7488	1.68742
	EC1608_Spot 83	509.518	32100.7	3.44129	20.5409	1.55908	0.0746615	3.17636	0.0111277	2.76741	0.871251	71.3374	1.96331	73.1134	2.24071	132.584	36.6555	71.3374	1.96331
	EC1608_Spot 76	1316.38	9292.52	5.29397	21.1799	1.5776	0.0724989	2.94599	0.0111415	2.48798	0.844531	71.4255	1.76724	71.0681	2.02207	60.0746	37.6097	71.4255	1.76724
	EC1608_Spot 92	936.368	44966.7	7.56997	20.9755	1.08951	0.073289	2.24286	0.0111542	1.96046	0.874088	71.5066	1.39411	71.8158	1.55508	83.1338	25.8546	71.5066	1.39411
	EC1608_Spot 115	292.922	2557.13	3.52508	23.47	2.17658	0.0658039	3.05749	0.011206	2.14726	0.702295	71.8369	1.53396	64.7097	1.91677	NA	NA	71.8369	1.53396
	EC1608_Spot 55	662.019	4395.27	4.96371	19.5459	3.20055	0.0792867	4.0531	0.0112446	2.48677	0.613549	72.083	1.78256	77.4741	3.0233	248.09	73.7167	72.083	1.78256
	EC1608_Spot 112	134.046	5936.21	2.80126	21.3036	2.11768	0.0727539	3.243	0.011246	2.45611	0.757357	72.0916	1.76078	71.3094	2.23323	46.1976	50.5828	72.0916	1.76078
	EC1608_Spot 51	648.914	9693.69	2.33726	21.0662	1.55304	0.0737015	2.59107	0.0112655	2.07405	0.800464	72.2162	1.48944	72.206	1.80593	72.8872	36.9257	72.2162	1.48944
	EC1608_Spot 45	380.689	1997.07	3.61843	23.5399	3.97757	0.06597	4.46723	0.0112678	2.03349	0.455201	72.2308	1.46061	64.8679	2.80719	NA	NA	72.2308	1.46061
	EC1608_Spot 43	178.018	1037.63	2.30885	28.3123	5.84545	0.0549506	6.41695	0.0112885	2.64725	0.41254	72.3625	1.9049	54.3168	3.39391	NA	NA	72.3625	1.9049
	EC1608_Spot 70	471.671	15198.8	3.73267	20.5209	1.72606	0.0761358	3.15312	0.0113364	2.63872	0.836862	72.6677	1.90673	74.5054	2.26513	134.894	40.5542	72.6677	1.90673
	EC1608_Spot 86	392.545	4917.69	3.32285	20.7825	1.89589	0.0752689	3.10243	0.0113501	2.45574	0.791554	72.7555	1.77664	73.6871	2.20511	105.026	44.8185	72.7555	1.77664
	EC1608_Spot 116	626.086	15448.3	1.60877	20.9467	1.78847	0.0748109	2.98006	0.0113702	2.38372	0.79989	72.8833	1.72755	73.2546	2.10614	86.4435	42.4162	72.8833	1.72755
	EC1608_Spot 111	257.515	2850.58	2.50616	22.4393	2.5143	0.0701514	3.42447	0.0114218	2.32492	0.678914	73.2121	1.6925	68.8431	2.27937	NA	NA	73.2121	1.6925
	EC1608_Spot 15	242.024	7594.01	1.90361	20.1689	2.02268	0.0786284	2.97774	0.0115067	2.18534	0.733892	73.7533	1.60258	76.8546	2.20407	175.385	47.178	73.7533	1.60258
	EC1608_Spot 107	205.773	2336	1.54478	23.2043	6.79336	0.0685572	7.22353	0.0115428	2.45552	0.339934	73.9832	1.80629	67.3294	4.70585	NA	NA	73.9832	1.80629
	EC1608_Spot 69	235.665	27726.7	1.3479	20.1102	1.99787	0.0793079	3.2103	0.0115723	2.51287	0.782753	74.1717	1.85316	77.494	2.39523	182.182	46.5375	74.1717	1.85316
	EC1608_Spot 99	271.208	25510.2	1.66317	21.275	2.02425	0.0752822	2.91044	0.0116211	2.09119	0.718512	74.4827	1.54861	73.6997	2.06899	49.3864	48.3483	74.4827	1.54861
	EC1608_Spot 36	355.225	6911.53	3.16736	21.0216	1.90549	0.0762643	3.20825	0.0116326	2.58108	0.804514	74.5554	1.91325	74.6266	2.30835	77.9196	45.2534	74.5554	1.91325
	EC1608_Spot 38	496.216	12697	1.04883	21.0208	1.59681	0.0766768	2.80637	0.011695	2.30779	0.822341	74.9536	1.71975	75.0158	2.02933	78.0092	37.9247	74.9536	1.71975
	EC1608_Spot 101	642.606	3904.89	5.09191	14.8174	2.1656	0.109683	2.93066	0.0117923	1.97459	0.673767	75.5733	1.48355	105.675	2.94128	852.856	45.0006	75.5733	1.48355
	EC1608_Spot 19	280.472	5819.63	2.66585	21.1461	2.10459	0.076871	3.46069	0.0117945	2.74719	0.793829	75.5874	2.06441	75.1989	2.50837	63.9136	50.1295	75.5874	2.06441
	EC1608_Spot 90	546.056	99419.4	5.37503	20.4917	1.52564	0.0798059	3.36224	0.0118659	2.99618	0.891125	76.0421	2.26497	77.9624	2.52318	138.241	35.8154	76.0421	2.26497
	EC1608_Spot 13	388.325	12950.6	1.49097	21.1102	1.82864	0.078304	4.13891	0.011994	3.71304	0.897105	76.8581	2.83683	76.5491	3.05183	67.9725	43.5159	76.8581	2.83683
	EC1608_Spot 50	488.752	749.348	6.24073	7.84628	1.1351	0.215125	2.93959	0.0122474	2.71159	0.922439	78.4722	2.11494	197.845	5.28434	2063.07	20.0191	78.4722	2.11494
	EC1608_Spot 54	394.379	19982.3	34.699	19.0755	0.91179	0.301912	2.91439	0.0417874	2.76809	0.9498	263.903	7.15755	267.893	6.86251	303.9	20.7584	263.903	7.15755
	EC1608_Spot 80	265.03	49100.7	10.7992	18.0262	1.56386	0.4185	3.01368	0.0547379	2.57617	0.854824	343.544	8.61859	354.978	9.02828	431.384	34.857	343.544	8.61859
	EC1608_Spot 7	279.367	9061.76	1.77499	19.3486	1.20899	0.395609	2.65968	0.0555397	2.36901	0.890714	348.443	8.03553	338.459	7.65543	271.404	27.7059	348.443	8.03553
	EC1608_Spot 82	664.945	37357.5	1.21209	18.8381	1.0376	0.419874	2.45872	0.0573911	2.22906	0.906593	359.74	7.79918	355.961	7.38271	332.382	23.5217	359.74	7.79918
	EC1608_Spot 79	772.075	21357.2	3.07866	16.9086	1.27872	0.483463	2.87275	0.0593143	2.57246	0.89547	371.454	9.28541	400.446	9.50662	572.301	27.7948	371.454	9.28541
	EC1608_Spot 118	160.317	34250.5	1.04968	17.0882	0.960003	0.696943	2.04724	0.0864137	1.8082	0.883238	534.292	9.27155	536.963	8.53767	549.298	20.9466	534.292	9.27155
	EC1608_Spot 23	146.603	3.88036e+06	2.60512	16.8806	1.0139	0.718616	2.28906	0.0880185	2.05227	0.896555	543.808	10.7026	549.85	9.71892	575.886	22.0405	543.808	10.7026
	EC1608_Spot 98	230.312	9010.8	1.37869	16.0408	1.27266	0.767475	2.79212	0.0893261	2.48521	0.890079	551.55	13.1372	578.314	12.3111	685.849	27.1661	551.55	13.1372
	EC1608_Spot 71	306.381	14308.9	1.92157	17.1671	1.1146	0.718102	2.94963	0.0894479	2.73093	0.925855	552.271	14.4542	549.546	12.5186	539.194	24.3822	552.271	14.4542
	EC1608_Spot 18	569.242	64959.2	2.44178	16.4949	0.87533	0.754931	2.46491	0.0903535	2.30426	0.934822	557.627	12.3091	571.081	10.767	625.925	18.8902	557.627	12.3091
	EC1608_Spot 62	323.098	109057	1.39811	16.6731	0.914889	0.784731	2.54906	0.0949347	2.37921	0.933371	584.656	13.2981	588.179	11.3809	602.719	19.7997	584.656	13.2981
	EC1608_Spot 104	210.432	38650.7	1.57044	16.2759	0.966855	0.824354	2.54102	0.0973525	2.34988	0.924781	598.875	13.439	610.475	11.659	654.668	20.7348	598.875	13.439
	EC1608_Spot 73	32.8114	11694.8	1.52189	16.0758	2.3275	0.838058	3.55859	0.0977538	2.69189	0.75645	601.232	15.4527	618.073	16.4763	681.158	49.7227	601.232	15.4527
	EC1608_Spot 94	84.2328	31993.7	1.31545	16.3777	1.18378	0.842106	2.32744	0.100071	2.00391	0.860993	614.825	11.7513	620.307	10.8038	641.315	25.4704	614.825	11.7513
	EC1608_Spot 84	174.995	33529	0.605712	16.087	0.934016	0.885819	2.36977	0.103397	2.17794	0.919051	634.284	13.1565	644.121	11.3031	679.671	19.9531	634.284	13.1565
	EC1608_Spot 41	302.745	15501.1	2.75761	16.2219	0.988063	0.899543	3.12215	0.105879	2.96169	0.948603	648.772	18.2794	651.483	15.0137	661.799	21.1536	648.772	18.2794
	EC1608_Spot 61	174.991	18632.2	1.84679	16.1207	0.966564	0.914927	2.87469	0.107018	2.70732	0.941779	655.408	16.8718	659.673	13.947	675.234	20.6798	655.408	16.8718
	EC1608_Spot 108	51.1316	38174.4	0.61324	14.2044	1.33429	1.22444	3.34814	0.126196	3.07079	0.917161	766.129	22.1821	811.802	18.7154	940.048	27.368	766.129	22.1821
	EC1608_Spot 47	106.545	23152	1.74965	14.4481	0.990306	1.24183	2.76349	0.130184	2.57995	0.933586	788.915	19.1575	819.709	15.5446	905.089	20.4225	788.915	19.1575
	EC1608_Spot 53	77.876	92490.4	2.98875	14.7902	1.42888	1.21339	2.53911	0.130216	2.0989	0.826628	789.096	15.5888	806.748	14.1346	856.67	29.6813	789.096	15.5888
	EC1608_Spot 57	105.989	21311.7	2.11807	14.1899	1.06624	1.28924	2.51776	0.132739	2.28084	0.905901	803.474	17.2299	840.959	14.3984	942.177	21.847	803.474	17.2299
	EC1608_Spot 39	31.3319	20536.3	2.02008	14.7131	1.42186	1.32569	2.67389	0.141525	2.26451	0.846897	853.279	18.0984	856.999	15.4774	867.537	29.477	853.279	18.0984
	EC1608_Spot 40	111.46	20365.3	0.494337	14.1438	1.09341	1.47004	2.026	0.150863	1.70561	0.841863	905.797	14.4131	918.143	12.2438	948.841	22.3948	948.841	22.3948
	EC1608_Spot 42	31.2383	25962.1	2.74881	13.8923	1.40307	1.54559	2.90743	0.155796	2.54648	0.875852	933.371	22.1277	948.737	17.9263	985.448	28.5587	985.448	28.5587
	EC1608_Spot 17	213.185	38650.5	4.24738	13.7399	0.876973	1.73542	2.8311	0.173012	2.69185	0.950814	1028.69	25.5944	1021.77	18.2395	1007.84	17.7695	1007.84	17.7695
	EC1608_Spot 119	158.247	39829.5	2.18611	13.6041	0.861401	1.6865	2.24635	0.166472	2.07463	0.923555	992.645	19.0865	1003.44	14.3198	1027.96	17.439	1027.96	17.439
	EC1608_Spot 68	66.724	11209.8	4.23715	13.5333	1.0525	1.6457	2.78092	0.161601	2.57406	0.925613	965.666	23.0847	987.902	17.566	1038.49	21.2695	1038.49	21.2695
	EC1608_Spot 46	229.132	71196.9	3.992	13.5192	0.908783	1.78634	2.77584	0.175227	2.62286	0.944889	1040.85	25.2101	1040.49	18.0717	1040.6	18.3618	1040.6	18.3618
	EC1608_Spot 120	43.9458	26036.1	2.29704	12.4588	1.37607	1.96675	2.23411	0.177793	1.76002	0.787794	1054.91	17.1271	1104.2	15.0395	1203.47	27.1143	1203.47	27.1143
	EC1608_Spot 93	188.669	38320.5	2.99819	12.3771	0.749562	2.30015	1.87619	0.206568	1.71995	0.916727	1210.51	18.9822	1212.34	13.2786	1216.46	14.7591	1216.46	14.7591
	EC1608_Spot 32	118.643	10952.8	3.38152	12.2355	0.827164	2.26313	1.8713	0.200919	1.67856	0.897002	1180.25	18.1035	1200.88	13.1787	1239.03	16.2145	1239.03	16.2145
	EC1608_Spot 74	370.173	77605.2	4.00814	11.5692	0.731677	2.77554	2.99249	0.232992	2.90166	0.969648	1350.16	35.3468	1348.98	22.3409	1347.94	14.1235	1347.94	14.1235
	EC1608_Spot 59	18.0485	5726.71	2.32141	10.9202	1.65996	3.11381	2.88112	0.246723	2.35487	0.817345	1421.55	30.042	1436.11	22.1467	1458.54	31.563	1458.54	31.563
	EC1608_Spot 35	271.353	91241.1	2.86839	10.3441	1.00496	3.27646	2.81545	0.245914	2.62998	0.934125	1417.37	33.4633	1475.48	21.9061	1560.89	18.8481	1560.89	18.8481
	EC1608_Spot 12	182.638	27818.4	3.38004	10.2246	0.851678	3.89866	2.34722	0.289233	2.18725	0.931849	1637.69	31.6328	1613.4	18.9702	1582.65	15.9275	1582.65	15.9275
	EC1608_Spot 33	293.085	57091.9	3.38977	9.91002	0.81541	3.77443	2.74084	0.271402	2.61673	0.954721	1547.92	36.0092	1587.32	22.0045	1640.86	15.1362	1640.86	15.1362
	EC1608_Spot 96	156.178	62118.5	1.67291	9.64631	0.832754	3.55928	2.15998	0.249122	1.993	0.922692	1433.94	25.6232	1540.5	17.1233	1690.76	15.3584	1690.76	15.3584
	EC1608_Spot 89	120.71	307594	2.50694	9.56937	2.25163	4.07821	3.56906	0.283166	2.76918	0.775885	1607.29	39.3943	1649.96	29.1113	1705.52	41.455	1705.52	41.455
	EC1608_Spot 97	1149.29	340777	10.7106	9.15758	1.02182	4.91674	2.54742	0.326697	2.3335	0.916026	1822.35	37.0429	1805.13	21.4976	1786.08	18.6225	1786.08	18.6225
	EC1608_Spot 65	131.69	37486.1	2.47008	8.43733	0.8677	4.82916	2.42897	0.295641	2.2687	0.934016	1669.66	33.3717	1789.99	20.4351	1934.03	15.5333	1934.03	15.5333
	EC1608_Spot 24	64.0118	27138.5	1.47121	8.33586	1.00846	5.81483	2.78733	0.351702	2.5985	0.932255	1942.72	43.5854	1948.62	24.1536	1955.66	18.0075	1955.66	18.0075
	EC1608_Spot 95	128.827	43728.1	2.62253	8.33085	0.86827	5.33824	2.46472	0.322682	2.30672	0.935895	1802.82	36.2775	1875.01	21.0809	1956.74	15.5019	1956.74	15.5019
	EC1608_Spot 34	254.601	36587.3	1.70232	7.96759	0.7425	6.3203	1.97318	0.365386	1.82815	0.9265	2007.65	31.5378	2021.27	17.3001	2035.97	13.1347	2035.97	13.1347
	EC1608_Spot 4	181.513	60599.6	1.95675	7.87317	0.833061	6.08231	2.30742	0.347461	2.15179	0.932552	1922.46	35.7695	1987.71	20.1237	2057.03	14.7036	2057.03	14.7036
	EC1608_Spot 2	152.556	63084.4	1.5164	7.76618	1.06011	6.56187	2.30758	0.369762	2.04965	0.888226	2028.28	35.6681	2054.24	20.3349	2081.14	18.6581	2081.14	18.6581
	EC1608_Spot 10	238.296	59892.8	2.62664	5.30243	0.950148	11.3746	2.33295	0.437622	2.13069	0.913306	2339.99	41.8119	2554.35	21.7774	2729.92	15.6434	2729.92	15.6434
	EC1608_Spot 100	423.666	1.5881e+06	3.84685	3.97228	0.756539	20.0676	2.88572	0.578394	2.78478	0.965023	2942.19	65.7859	3094.62	27.9173	3195.76	11.9685	3195.76	11.9685
6	EC1550
	EC1550_Spot 33	267.322	1380.05	1.71054	21.496	6.87065	0.00671641	7.76054	0.00104711	3.60834	0.46496	6.74658	0.243312	6.79692	0.525717	24.6682	165.003	6.74658	0.243312
	EC1550_Spot 112	647.399	2064.78	1.45132	22.9278	4.40199	0.00918468	5.12212	0.0015273	2.61889	0.51129	9.83812	0.257453	9.2834	0.473339	132.347	108.887	9.83812	0.257453
	EC1550_Spot 18	282.607	572.575	2.20439	38.3825	22.1309	0.00553649	22.4389	0.00154122	3.70509	0.165119	9.92772	0.367548	5.60615	1.25449	1615.41	763.147	9.92772	0.367548
	EC1550_Spot 108	1393.94	11876	2.42378	21.4958	2.31201	0.0100485	3.02291	0.00156658	1.94745	0.64423	10.0909	0.196361	10.1521	0.30536	24.6807	55.4527	10.0909	0.196361
	EC1550_Spot 71	486.018	56553.6	2.44524	17.587	4.55561	0.0122953	5.11103	0.0015683	2.31711	0.453354	10.102	0.23389	12.4083	0.630332	486.092	100.605	10.102	0.23389
	EC1550_Spot 14	287.612	458.105	2.06579	63.6129	20.7841	0.00343495	20.9976	0.00158476	2.9871	0.142259	10.208	0.30468	3.48181	0.729846	0	1334.97	10.208	0.30468
	EC1550_Spot 100	109.887	502.644	1.93555	100.505	85.2867	0.00233038	85.4354	0.00169869	5.03949	0.0589859	10.9412	0.550911	2.36347	2.0169	0	428.514	10.9412	0.550911
	EC1550_Spot 5	1131.53	2008.05	1.48174	25.9008	10.1104	0.00952573	10.2106	0.00178941	1.42723	0.139779	11.525	0.16434	9.62649	0.978281	443.197	266.577	11.525	0.16434
	EC1550_Spot 90	133.605	624.263	3.08033	31.8187	9.02294	0.00778089	10.0097	0.0017956	4.33358	0.43294	11.5648	0.500721	7.87	0.784716	1018.25	268.997	11.5648	0.500721
	EC1550_Spot 98	779.825	1071.25	2.39194	26.7065	19.0531	0.00932247	19.1856	0.0018057	2.25131	0.117343	11.6298	0.261587	9.42203	1.79932	524.483	513.557	11.6298	0.261587
	EC1550_Spot 106	186.271	569.867	1.70699	60.8187	18.4042	0.00452158	18.704	0.00199447	3.33494	0.178301	12.8443	0.427924	4.58079	0.854859	0	1301.33	12.8443	0.427924
	EC1550_Spot 45	492.265	1514.93	1.88977	24.287	4.95519	0.0113916	5.7894	0.00200658	2.99387	0.51713	12.9223	0.386489	11.5014	0.662106	276.777	126.126	12.9223	0.386489
	EC1550_Spot 2	250.065	563.926	1.8702	44.4157	11.5916	0.00655928	11.9659	0.00211296	2.96942	0.248156	13.6066	0.403612	6.63844	0.79176	2146.74	451.649	13.6066	0.403612
	EC1550_Spot 41	524.275	1511.5	2.69203	24.6631	4.64502	0.0118769	5.15103	0.00212447	2.22642	0.432228	13.6807	0.304267	11.9886	0.613904	316.026	119.157	13.6807	0.304267
	EC1550_Spot 77	424.379	2981.9	2.5517	25.0256	4.07565	0.0117254	4.71701	0.00212819	2.37471	0.503435	13.7046	0.325099	11.8365	0.555086	353.58	105.335	13.7046	0.325099
	EC1550_Spot 116	61.3699	214.393	2.30144	-46.9955	24.2154	-0.00634447	24.7481	0.00216247	5.10738	0.206375	13.9251	0.710441	6.46259	1.60447	0	0	13.9251	0.710441
	EC1550_Spot 24	91.0503	364.083	2.09857	35.1546	9.95645	0.00870911	11.1056	0.00222052	4.91972	0.442994	14.2985	0.702668	8.80479	0.973599	1325.45	318.375	14.2985	0.702668
	EC1550_Spot 85	575.577	2398.76	1.92245	22.8105	3.14598	0.0148768	3.95548	0.00246117	2.39762	0.606153	15.8462	0.379467	14.9943	0.58874	119.68	77.6119	15.8462	0.379467
	EC1550_Spot 80	538.643	40880.9	2.08708	21.4113	2.67162	0.0187113	3.4529	0.00290567	2.18746	0.633512	18.704	0.408548	18.8235	0.64397	34.1287	63.98	18.704	0.408548
	EC1550_Spot 67	1656.44	8911.85	0.537845	22.4098	1.57186	0.0184408	2.31585	0.0029972	1.70071	0.734377	19.2923	0.327615	18.5539	0.425778	76.1502	38.4471	19.2923	0.327615
	EC1550_Spot 54	1000.12	1853.28	1.28887	12.2809	10.8716	0.0443063	11.5333	0.00394635	3.85056	0.333864	25.3897	0.975723	44.0197	4.9685	1231.79	213.955	25.3897	0.975723
	EC1550_Spot 22	563.995	2503.3	2.10138	23.1791	2.32118	0.0236284	3.07062	0.00397218	2.01018	0.654648	25.5556	0.512695	23.7128	0.719693	159.368	57.7034	25.5556	0.512695
	EC1550_Spot 49	75.3445	651.696	3.26909	55.7985	10.1726	0.0103115	10.879	0.00417296	3.85638	0.354479	26.8446	1.03308	10.4165	1.12742	3149.4	1323.14	26.8446	1.03308
	EC1550_Spot 117	173.149	561.738	2.47381	37.9403	31.1131	0.0158707	31.2296	0.00436714	2.69491	0.0862933	28.0911	0.755382	15.9883	4.95403	1576.01	1073.05	28.0911	0.755382
	EC1550_Spot 23	272.697	747.505	2.20756	36.3644	5.07311	0.0167663	5.60049	0.00442193	2.37258	0.423638	28.4428	0.673341	16.8831	0.937719	1434.8	166.166	28.4428	0.673341
	EC1550_Spot 47	357.441	2364.81	2.06064	25.0381	2.95855	0.0245131	4.00746	0.00445142	2.70308	0.674514	28.632	0.772231	24.59	0.973598	354.868	76.4717	28.632	0.772231
	EC1550_Spot 119	253.931	1497.98	2.73297	25.8388	3.49322	0.0238267	4.1275	0.00446514	2.19856	0.532662	28.7201	0.630025	23.9095	0.975338	436.895	91.82	28.7201	0.630025
	EC1550_Spot 99	144.088	4211.96	2.03697	22.7908	4.0463	0.0271904	5.04583	0.00449442	3.01461	0.597446	28.908	0.869513	27.24	1.35621	117.55	99.7948	28.908	0.869513
	EC1550_Spot 96	182.252	2888.52	2.45723	20.3229	5.67858	0.0305978	6.10118	0.00450998	2.23118	0.365696	29.0078	0.645763	30.6026	1.83927	157.632	133.002	29.0078	0.645763
	EC1550_Spot 19	277.714	1258.86	2.17534	23.9823	5.55845	0.0260719	6.14003	0.00453484	2.60838	0.424815	29.1674	0.759077	26.1337	1.58415	244.759	140.599	29.1674	0.759077
	EC1550_Spot 78	92.9329	10291.9	2.26429	19.2879	5.47436	0.0324215	6.50859	0.00453541	3.52039	0.540884	29.1711	1.02462	32.3978	2.07536	278.644	125.389	29.1711	1.02462
	EC1550_Spot 36	139.075	484.292	2.34572	69.1739	28.6492	0.00904532	28.8395	0.00453801	3.30782	0.114697	29.1877	0.963293	9.14318	2.62502	0	1289.52	29.1877	0.963293
	EC1550_Spot 30	688.809	10143.5	1.51185	19.6827	2.75191	0.0318527	3.11508	0.00454705	1.45971	0.468595	29.2458	0.425937	31.8383	0.976402	232.018	63.5457	29.2458	0.425937
	EC1550_Spot 89	503.497	2331.29	1.946	24.5149	2.51912	0.0255852	3.20012	0.00454902	1.97353	0.616704	29.2584	0.576114	25.652	0.810613	300.592	64.4023	29.2584	0.576114
	EC1550_Spot 105	577.707	30514.4	1.89113	21.8298	2.54158	0.0289177	3.31015	0.00457837	2.12074	0.640676	29.4467	0.623063	28.946	0.944628	12.4035	61.3929	29.4467	0.623063
	EC1550_Spot 40	266.137	2.80635e+06	2.1597	20.5575	2.74727	0.0312719	3.81922	0.00466254	2.6531	0.694671	29.9868	0.793733	31.2666	1.17594	130.702	64.6389	29.9868	0.793733
	EC1550_Spot 55	394.163	6494.91	2.00443	20.4057	2.05387	0.0316507	2.84074	0.00468418	1.96252	0.690845	30.1257	0.589842	31.6395	0.884939	148.131	48.1706	30.1257	0.589842
	EC1550_Spot 4	403.622	1398.44	2.56779	27.2246	2.8206	0.023835	3.91326	0.00470624	2.71252	0.693162	30.2672	0.819081	23.9177	0.925024	576.172	76.307	30.2672	0.819081
	EC1550_Spot 88	175.813	593.906	2.04325	8.54262	18.1088	0.0761702	18.474	0.00471927	3.65495	0.197844	30.3508	1.1067	74.5379	13.2776	1911.8	327.864	30.3508	1.1067
	EC1550_Spot 38	419.132	3163.6	4.08141	21.8896	3.21833	0.029855	3.71049	0.00473973	1.84664	0.497682	30.4821	0.561566	29.8706	1.0922	19.019	77.8735	30.4821	0.561566
	EC1550_Spot 28	524.309	4526.62	2.56312	21.5826	3.31712	0.0306392	4.24166	0.00479601	2.64355	0.623236	30.8432	0.813409	30.6435	1.28038	15.0172	79.7277	30.8432	0.813409
	EC1550_Spot 17	288.751	1397.61	3.13238	26.6473	4.16484	0.0248704	4.79769	0.00480656	2.38159	0.496403	30.9109	0.734407	24.944	1.18216	518.552	111.347	30.9109	0.734407
	EC1550_Spot 91	556.81	11916.1	3.20518	21.899	2.33024	0.0303461	2.85781	0.00481976	1.6544	0.578905	30.9955	0.511559	30.3546	0.854638	20.0551	56.3673	30.9955	0.511559
	EC1550_Spot 64	126.821	8917.09	1.57374	23.3605	3.9899	0.0284882	4.95576	0.00482665	2.93944	0.593136	31.0397	0.910201	28.522	1.39382	178.785	99.5864	31.0397	0.910201
	EC1550_Spot 31	353.048	980.673	1.9703	13.3769	6.71018	0.0498364	6.99433	0.00483503	1.97338	0.28214	31.0935	0.612115	49.3825	3.37134	1061.97	135.132	31.0935	0.612115
	EC1550_Spot 59	543.146	2989.18	2.37925	24.5512	2.59249	0.0278841	3.57442	0.0049651	2.46079	0.688444	31.9279	0.783736	27.9255	0.984575	304.372	66.3284	31.9279	0.783736
	EC1550_Spot 101	112.6	505.42	2.37379	39.3799	6.18333	0.0174928	6.8664	0.00499611	2.98561	0.434815	32.1268	0.956796	17.6083	1.19863	1703.98	215.898	32.1268	0.956796
	EC1550_Spot 15	1477.66	4236.17	1.44551	22.7589	1.48563	0.0302829	2.1688	0.00499859	1.58006	0.728542	32.1427	0.50661	30.2923	0.647275	114.101	36.6053	32.1427	0.50661
	EC1550_Spot 39	405.186	4250.45	2.93988	19.6338	2.91136	0.0368403	4.10849	0.00524598	2.89891	0.705591	33.7294	0.975231	36.7345	1.48226	237.794	67.1679	33.7294	0.975231
	EC1550_Spot 68	316.63	3927.68	1.47207	22.3087	4.63691	0.0361475	5.39265	0.00584858	2.75313	0.510533	37.5925	1.03196	36.0557	1.91025	65.0983	113.22	37.5925	1.03196
	EC1550_Spot 81	147.592	322.383	1.84091	3.20283	14.3365	0.296729	14.6202	0.00689274	2.86623	0.196046	44.281	1.26485	263.842	33.9826	3531.94	222.427	44.281	1.26485
	EC1550_Spot 61	518.95	3637.04	2.76412	16.4626	4.51173	0.065364	8.30318	0.00780431	6.97044	0.839491	50.1145	3.47966	64.2905	5.17272	630.2	97.2571	50.1145	3.47966
	EC1550_Spot 110	204.298	1848.23	1.25524	24.8821	3.56029	0.0486027	4.28059	0.00877094	2.3765	0.55518	56.2946	1.33201	48.1886	2.01457	338.744	91.7328	56.2946	1.33201
	EC1550_Spot 113	93.6862	938.111	1.67207	33.8793	27.707	0.0368011	27.8773	0.00904263	3.07645	0.110357	58.0305	1.77727	36.6961	10.0476	1209.08	873.939	58.0305	1.77727
	EC1550_Spot 82	871.061	9951.11	1.1105	22.16	1.30854	0.0562776	2.21719	0.0090449	1.78987	0.807272	58.045	1.03427	55.5933	1.19947	48.8006	31.8383	58.045	1.03427
	EC1550_Spot 107	200.397	3487.4	1.0294	22.8175	2.92339	0.0549347	4.17674	0.00909105	2.9831	0.714218	58.3399	1.73249	54.3016	2.20846	120.435	72.1289	58.3399	1.73249
	EC1550_Spot 73	1068.64	16119.5	1.55373	20.8348	1.29225	0.0604457	2.47068	0.00913386	2.10579	0.852311	58.6134	1.22868	59.5921	1.42996	99.1094	30.5673	58.6134	1.22868
	EC1550_Spot 70	266.429	4016.04	1.31429	23.1191	4.60567	0.0548104	5.13494	0.00919036	2.27054	0.442175	58.9743	1.33293	54.1819	2.70928	152.931	114.387	58.9743	1.33293
	EC1550_Spot 44	331.172	2128.97	2.05203	23.1981	8.4129	0.0548542	8.70685	0.00922916	2.24329	0.257647	59.2221	1.32244	54.2241	4.59739	161.412	209.495	59.2221	1.32244
	EC1550_Spot 25	304.845	3514.04	0.861682	23.2334	5.20314	0.0552475	5.84255	0.00930943	2.65758	0.454866	59.7348	1.58017	54.6025	3.10593	165.185	129.553	59.7348	1.58017
	EC1550_Spot 48	1376.23	7205.09	1.50266	21.9805	1.18217	0.0584456	2.09155	0.00931725	1.72542	0.824947	59.7848	1.02677	57.6752	1.17269	29.0508	28.654	59.7848	1.02677
	EC1550_Spot 104	543.014	4115.14	1.16372	18.6295	4.87399	0.0693166	5.57161	0.00936564	2.69946	0.484503	60.0938	1.61467	68.0507	3.66728	357.555	110.072	60.0938	1.61467
	EC1550_Spot 21	752.527	10023.9	1.39809	21.6275	1.42132	0.0602517	2.34302	0.00945095	1.86269	0.794995	60.6387	1.12422	59.4064	1.35197	9.9995	34.1846	60.6387	1.12422
	EC1550_Spot 9	83.3	2001.83	1.36437	23.6272	6.57027	0.0562105	7.49337	0.00963228	3.60308	0.480836	61.7965	2.21594	55.5288	4.04927	207.193	165.003	61.7965	2.21594
	EC1550_Spot 11	3951.52	411063	5.16601	20.9102	0.751923	0.0653232	1.51872	0.00990658	1.31951	0.868834	63.5477	0.8344	64.2516	0.945568	90.5511	17.8186	63.5477	0.8344
	EC1550_Spot 114	1322.3	62725.5	23.3977	14.3173	1.42321	0.292149	2.24779	0.0303364	1.73983	0.77402	192.653	3.30226	260.249	5.16036	923.834	29.245	192.653	3.30226
	EC1550_Spot 75	408.372	10755.5	5.14696	19.7841	0.824745	0.242181	1.92973	0.03475	1.74461	0.904068	220.208	3.7769	220.205	3.82018	220.166	19.102	220.208	3.7769
	EC1550_Spot 42	814.992	31639.5	5.46448	19.4192	0.998524	0.247705	2.13195	0.0348871	1.88366	0.883537	221.063	4.09348	224.71	4.29766	263.073	22.9329	221.063	4.09348
	EC1550_Spot 94	427.443	9520.99	5.29172	20.0649	1.03493	0.240967	2.24553	0.0350666	1.99281	0.887459	222.18	4.35221	219.212	4.42739	187.434	24.0888	222.18	4.35221
	EC1550_Spot 103	562.115	87476.3	2.30914	19.5276	0.905164	0.247909	2.01488	0.0351107	1.80012	0.893411	222.455	3.93615	224.876	4.06435	250.255	20.83	222.455	3.93615
	EC1550_Spot 66	580.582	32244.9	15.0101	19.7681	0.68309	0.247373	1.8583	0.0354663	1.7282	0.929989	224.67	3.81586	224.44	3.74201	222.058	15.8075	224.67	3.81586
	EC1550_Spot 26	444.353	9901.07	7.96021	20.147	0.91213	0.243795	1.92698	0.0356233	1.69743	0.880877	225.647	3.76395	221.523	3.83518	177.918	21.2814	225.647	3.76395
	EC1550_Spot 115	263.436	45344.7	8.19593	19.7741	0.950473	0.249983	2.3962	0.0358515	2.19964	0.917967	227.067	4.90771	226.562	4.8659	221.305	21.9936	227.067	4.90771
	EC1550_Spot 86	205.706	17928.5	4.81906	19.8654	1.13206	0.249492	2.37357	0.0359462	2.08621	0.878933	227.656	4.66651	226.163	4.81236	210.654	26.253	227.656	4.66651
	EC1550_Spot 43	391.629	19460.5	6.7267	19.9144	1.2991	0.249419	2.75009	0.0360243	2.42391	0.881392	228.143	5.43325	226.104	5.57446	204.977	30.1644	228.143	5.43325
	EC1550_Spot 20	445.641	30259.7	7.86333	19.4984	0.84853	0.255717	1.76613	0.0361624	1.54894	0.877024	229.001	3.48483	231.209	3.65192	253.698	19.4919	229.001	3.48483
	EC1550_Spot 8	224.026	8582.52	2.29305	20.0213	1.17844	0.249936	2.45449	0.0362928	2.15309	0.877204	229.813	4.86091	226.524	4.98351	192.537	27.4125	229.813	4.86091
	EC1550_Spot 84	339.929	23656.2	8.68069	20.0552	0.944868	0.249626	2.51837	0.0363091	2.3344	0.926948	229.914	5.27254	226.272	5.10814	188.559	22.0007	229.914	5.27254
	EC1550_Spot 63	494.397	14218.5	1.6158	19.762	0.959655	0.253513	1.92106	0.0363353	1.66419	0.866287	230.077	3.76139	229.426	3.94496	222.755	22.1886	230.077	3.76139
	EC1550_Spot 46	835.616	73220.4	2.82821	19.3858	0.820731	0.259943	2.21379	0.0365477	2.05604	0.928739	231.399	4.67326	234.621	4.63764	267.03	18.817	231.399	4.67326
	EC1550_Spot 79	340.936	15186.6	4.86903	19.557	1.07305	0.25844	2.15138	0.0366572	1.86467	0.866732	232.079	4.25054	233.409	4.48617	246.838	24.6857	232.079	4.25054
	EC1550_Spot 6	495.556	33073.7	1.29093	19.0055	1.05352	0.26603	2.23974	0.0366698	1.9765	0.882466	232.158	4.50695	239.515	4.77879	312.31	23.9584	232.158	4.50695
	EC1550_Spot 1	1068.13	463548	4.36542	19.5301	0.938351	0.25978	1.76659	0.0367967	1.49677	0.847268	232.947	3.42445	234.49	3.69895	249.957	21.574	232.947	3.42445
	EC1550_Spot 58	317.868	174094	2.42762	19.6912	1.38637	0.261793	2.42587	0.0373877	1.99068	0.820607	236.62	4.62496	236.111	5.11058	231.022	32.0153	236.62	4.62496
	EC1550_Spot 97	565.883	146572	9.68343	18.5468	0.976295	0.281325	1.90476	0.0378421	1.63554	0.858655	239.444	3.84435	251.708	4.24642	367.595	21.9918	239.444	3.84435
	EC1550_Spot 29	983.831	39639.5	1.54471	19.7322	0.781971	0.26685	1.8279	0.0381892	1.65219	0.903875	241.599	3.91781	240.172	3.90955	226.237	18.0889	241.599	3.91781
	EC1550_Spot 34	249.793	19047.1	6.78386	19.3388	1.03617	0.279013	2.65995	0.039134	2.44983	0.921008	247.463	5.94754	249.875	5.89194	272.561	23.7387	247.463	5.94754
	EC1550_Spot 13	492.349	14414.3	1.27269	18.6843	1.13744	0.298597	1.80177	0.0404632	1.39735	0.775545	255.704	3.50315	265.304	4.20671	350.966	25.6929	255.704	3.50315
	EC1550_Spot 50	401.192	16662.4	9.89061	18.042	0.881363	0.309655	2.30515	0.0405192	2.13001	0.92402	256.05	5.347	273.914	5.53421	429.438	19.6466	256.05	5.347
	EC1550_Spot 120	145.344	5097.08	2.05005	19.8843	1.71549	0.296933	3.52791	0.0428221	3.08273	0.873812	270.302	8.1604	264.002	8.20159	208.485	39.8013	270.302	8.1604
	EC1550_Spot 7	662.485	46343.3	0.751662	19.3703	0.826521	0.306121	1.78315	0.0430059	1.58003	0.886088	271.438	4.19977	271.17	4.24356	268.832	18.9686	271.438	4.19977
	EC1550_Spot 76	242.268	8243.12	2.25704	19.824	1.03771	0.302131	2.25682	0.0434395	2.00409	0.888016	274.118	5.3784	268.063	5.31705	215.477	24.0184	274.118	5.3784
	EC1550_Spot 12	169.86	17568.5	1.46479	18.5791	1.1186	0.434395	2.52199	0.058534	2.26035	0.896255	366.704	8.05744	366.293	7.7553	363.671	25.2252	366.704	8.05744
	EC1550_Spot 57	1512.71	328244	4.33047	17.7577	0.654634	0.529497	2.00541	0.0681944	1.89556	0.94522	425.268	7.80106	431.476	7.04946	464.774	14.5036	425.268	7.80106
	EC1550_Spot 102	101.518	15682.1	2.47959	17.7274	1.13342	0.612916	3.11174	0.0788032	2.89798	0.931306	488.975	13.6463	485.397	12.0072	468.546	25.0975	488.975	13.6463
	EC1550_Spot 74	482.947	69910.2	2.51372	16.611	0.786917	0.771741	1.91869	0.0929751	1.7499	0.912026	573.108	9.59595	580.761	8.48628	610.785	16.9862	573.108	9.59595
	EC1550_Spot 118	186.631	24447.5	0.615188	16.3071	0.921744	0.842718	2.41727	0.0996685	2.23463	0.924445	612.466	13.0563	620.644	11.2253	650.564	19.7707	612.466	13.0563
	EC1550_Spot 27	389.22	152508	1.35808	14.5753	0.802757	1.11884	2.55991	0.118272	2.43078	0.949559	720.61	16.5729	762.417	13.7262	886.997	16.5752	720.61	16.5729
	EC1550_Spot 62	179.389	18160.2	1.85809	13.6932	0.855051	1.63984	2.23145	0.162856	2.06113	0.923673	972.63	18.6082	985.651	14.0757	1014.74	17.3263	1014.74	17.3263
	EC1550_Spot 92	71.3527	25095.9	3.17939	13.5869	1.00706	1.78657	2.62275	0.176051	2.42171	0.923345	1045.36	23.3697	1040.58	17.0757	1030.52	20.377	1030.52	20.377
	EC1550_Spot 35	414.863	88853.7	34.9212	12.9078	0.621466	1.62144	2.15936	0.151794	2.068	0.95769	911.012	17.5691	978.551	13.5626	1133.39	12.3719	1133.39	12.3719
	EC1550_Spot 83	250.347	97356	2.34537	12.8482	0.737919	2.0939	2.23427	0.195118	2.10889	0.943885	1149.04	22.1952	1146.81	15.3549	1142.59	14.6502	1142.59	14.6502
	EC1550_Spot 52	173.409	115015	1.40164	12.5785	0.656209	1.98105	2.91837	0.180727	2.84364	0.974392	1070.94	28.0587	1109.08	19.6948	1184.65	12.9652	1184.65	12.9652
	EC1550_Spot 93	113.427	86520.6	2.62777	12.3462	0.639677	2.31536	2.9023	0.207325	2.83092	0.975409	1214.55	31.3384	1217	20.5835	1221.35	12.5721	1221.35	12.5721
	EC1550_Spot 65	185.925	114313	2.25331	10.3015	0.643539	3.38009	2.38574	0.252539	2.2973	0.962932	1451.55	29.8591	1499.79	18.6959	1568.61	12.0566	1568.61	12.0566
	EC1550_Spot 72	164.358	156670	0.390095	10.0181	0.652023	3.93584	2.18366	0.285972	2.08404	0.954381	1621.37	29.8758	1621.08	17.6821	1620.69	12.1331	1620.69	12.1331
	EC1550_Spot 3	324.798	98411.7	1.76211	7.9454	0.543664	5.89311	2.64046	0.339593	2.58389	0.978574	1884.71	42.2264	1960.22	22.9252	2040.9	9.61126	2040.9	9.61126
7	EC1635
	EC1635_Spot 86	931.628	84	0.729424	21.3438	14.7337	0.000124818	19.7807	1.93302e-05	13.1983	0.667232	0.124609	0.0164462	0.12673	0.0250665	41.68	353.96	0.124609	0.0164462
	EC1635_Spot 55	658.127	168	2.65856	21.4951	25.3858	0.00703298	25.6185	0.0010969	3.44508	0.134476	7.0672	0.243337	7.11618	1.81669	24.7838	617.59	7.0672	0.243337
	EC1635_Spot 22	288.834	379.753	2.01983	57.2003	24.8055	0.00295665	25.1465	0.00122712	4.1269	0.164114	7.90566	0.326058	2.9977	0.752705	NA	NA	7.90566	0.326058
	EC1635_Spot 35	298.165	540.548	2.71933	39.7341	9.45953	0.00428215	10.2697	0.00123456	3.99798	0.389299	7.95358	0.317787	4.33874	0.444625	NA	NA	7.95358	0.317787
	EC1635_Spot 66	263.652	714.431	3.5591	30.8738	5.93055	0.0055315	7.40955	0.00123914	4.44185	0.599476	7.98306	0.354376	5.60111	0.413875	NA	NA	7.98306	0.354376
	EC1635_Spot 79	515.045	5035.01	2.93561	20.1454	3.52112	0.00863627	4.50363	0.00126238	2.80791	0.623478	8.1327	0.228215	8.73147	0.391547	178.103	82.1149	8.1327	0.228215
	EC1635_Spot 81	114.561	10495.9	2.51424	20.7076	3.09773	0.081002	4.83086	0.0121706	3.70692	0.767341	77.9832	2.87336	79.0866	3.67558	113.586	73.084	77.9832	2.87336
	EC1635_Spot 75	25.8386	942.902	2.98134	27.2147	22.0649	0.104711	22.2928	0.0206769	3.17917	0.14261	131.932	4.15172	101.116	21.4587	NA	NA	131.932	4.15172
	EC1635_Spot 107	8.97282	20	32.943	2	0	1.80544	3.21458	0.0261999	3.21458	1	166.721	5.29067	1047.43	21.0087	NA	NA	166.721	5.29067
	EC1635_Spot 11	135.908	6814.38	1.25799	19.336	1.72596	0.33795	3.54536	0.0474141	3.09688	0.873502	298.626	9.03715	295.617	9.09316	272.896	39.5348	298.626	9.03715
	EC1635_Spot 110	132.507	11095	1.53437	18.6632	1.14596	0.370758	2.94481	0.050207	2.71269	0.921176	315.792	8.36002	320.215	8.08771	353.485	25.8791	315.792	8.36002
	EC1635_Spot 99	1062.05	34039.5	3.39938	18.2989	1.10888	0.417594	3.25533	0.0554456	3.06065	0.940196	347.868	10.3648	354.329	9.73734	397.832	24.8553	347.868	10.3648
	EC1635_Spot 41	737.126	40763	25.2567	13.5062	1.20302	0.590407	3.1435	0.0578591	2.9042	0.923873	362.592	10.2397	471.128	11.8497	1042.55	24.2939	362.592	10.2397
	EC1635_Spot 108	287.441	29122.8	3.66401	18.1383	1.35264	0.463425	2.84499	0.0609908	2.50287	0.879746	381.648	9.27491	386.637	9.14813	417.558	30.2158	381.648	9.27491
	EC1635_Spot 54	375.162	69128.7	12.3532	15.5577	1.39557	0.560063	3.45679	0.0632221	3.16256	0.914884	395.191	12.1228	451.567	12.6014	750.739	29.4753	395.191	12.1228
	EC1635_Spot 8	449.972	253100	2.73041	17.6924	1.23972	0.545636	2.92817	0.0700451	2.65278	0.905953	436.428	11.1943	442.134	10.4963	472.904	27.4488	436.428	11.1943
	EC1635_Spot 49	193.016	22249.1	7.83175	17.4232	1.06898	0.56614	3.72914	0.0715713	3.57264	0.958033	445.615	15.3825	455.515	13.6886	506.727	23.5137	445.615	15.3825
	EC1635_Spot 115	766.836	340229	0.590809	17.3668	0.912995	0.576791	2.58355	0.0726817	2.41685	0.935477	452.292	10.5566	462.397	9.59631	513.871	20.058	452.292	10.5566
	EC1635_Spot 114	158.588	31638.4	1.61413	17.6177	1.36142	0.590071	3.32334	0.0754295	3.03169	0.912241	468.784	13.7076	470.913	12.5232	482.284	30.0941	468.784	13.7076
	EC1635_Spot 2	109.472	11368.1	2.30998	17.6928	1.41583	0.591611	3.33628	0.0759486	3.02095	0.905487	471.895	13.7465	471.896	12.5925	472.856	31.3463	471.895	13.7465
	EC1635_Spot 95	226.765	28206.3	12.7142	17.4414	1.25236	0.602922	2.9221	0.0763009	2.64013	0.903503	474.005	12.0653	479.087	11.1607	504.461	27.558	474.005	12.0653
	EC1635_Spot 103	129.98	19963.1	1.14612	17.6403	1.26226	0.60418	2.72618	0.077332	2.41635	0.88635	480.178	11.1812	479.883	10.4259	479.416	27.8958	480.178	11.1812
	EC1635_Spot 71	40.3825	11937.3	1.4928	17.5244	1.56648	0.61586	3.4604	0.0783093	3.08553	0.891669	486.023	14.445	487.249	13.3924	493.965	34.5352	486.023	14.445
	EC1635_Spot 94	129.231	12543	2.47807	17.0167	1.49497	0.647035	2.80204	0.0798898	2.36991	0.845781	495.465	11.3022	506.652	11.1775	558.422	32.5871	495.465	11.3022
	EC1635_Spot 102	287.07	149663	1.74695	17.0768	0.915655	0.649539	2.94447	0.080482	2.79848	0.950418	498.999	13.4376	508.195	11.7733	550.754	19.9793	498.999	13.4376
	EC1635_Spot 52	273.199	19539.3	1.90122	17.553	0.977355	0.63226	2.78473	0.0805258	2.60759	0.936387	499.26	12.5273	497.503	10.9531	490.36	21.5626	499.26	12.5273
	EC1635_Spot 90	289.025	28549.1	1.75793	16.8681	1.08699	0.674249	4.01666	0.082523	3.86679	0.962686	511.165	19.0024	523.292	16.4261	577.516	23.6111	511.165	19.0024
	EC1635_Spot 10	104.892	9183.59	2.15541	17.1906	1.47259	0.665435	3.57842	0.0830013	3.26138	0.911401	514.012	16.113	517.933	14.5187	536.24	32.2511	514.012	16.113
	EC1635_Spot 98	160.529	14344.8	4.1006	17.3374	1.16436	0.665471	2.79203	0.0837144	2.53765	0.908892	518.255	12.6368	517.955	11.3282	517.566	25.5642	518.255	12.6368
	EC1635_Spot 58	178.892	53098.5	4.46058	16.9857	1.0652	0.682555	3.01096	0.0841219	2.81625	0.935331	520.679	14.0871	528.318	12.403	562.386	23.2297	520.679	14.0871
	EC1635_Spot 15	458.751	38098.1	5.77098	17.1975	1.14463	0.67929	3.09612	0.0847634	2.87677	0.929152	524.492	14.491	526.345	12.7174	535.363	25.046	524.492	14.491
	EC1635_Spot 32	175.849	12935	1.62961	17.1112	1.42072	0.689578	3.16465	0.0856152	2.82782	0.893565	529.553	14.3763	532.547	13.1155	546.327	31.0491	529.553	14.3763
	EC1635_Spot 116	361.772	24457.7	164.505	16.8404	0.974294	0.716633	2.7316	0.0875661	2.55194	0.934228	541.126	13.2455	548.677	11.5794	581.077	21.1599	541.126	13.2455
	EC1635_Spot 59	62.7237	8702.19	1.49431	17.2268	1.26819	0.705762	2.84979	0.0882167	2.55206	0.895525	544.982	13.3366	542.227	11.973	531.636	27.7966	544.982	13.3366
	EC1635_Spot 57	179.744	29102.4	2.40848	16.7761	1.36335	0.731917	3.18752	0.0890923	2.88125	0.903914	550.167	15.1941	557.677	13.6787	589.376	29.5624	550.167	15.1941
	EC1635_Spot 28	82.3302	53092.5	1.18593	16.8188	1.33139	0.735617	2.76863	0.0897709	2.42749	0.876783	554.182	12.8907	559.845	11.9155	583.854	28.9049	554.182	12.8907
	EC1635_Spot 117	101.02	6720.66	22.4088	16.9267	1.24791	0.735453	3.03431	0.0903264	2.76582	0.911515	557.467	14.7707	559.749	13.0574	570.006	27.1673	557.467	14.7707
	EC1635_Spot 34	97.0661	18508.8	0.843067	16.6562	1.22679	0.748526	3.25482	0.090463	3.01477	0.926247	558.274	16.1225	567.369	14.1488	604.913	26.5588	558.274	16.1225
	EC1635_Spot 20	292.686	33311.7	5.2529	16.8921	1.26439	0.747549	3.52563	0.0916246	3.2911	0.93348	565.138	17.8074	566.801	15.3147	574.446	27.4942	565.138	17.8074
	EC1635_Spot 84	180.021	38721.8	1.12499	16.6873	1.10542	0.757241	2.53849	0.0916871	2.28516	0.900206	565.507	12.3722	572.417	11.1077	600.874	23.909	565.507	12.3722
	EC1635_Spot 51	464.174	133728	3.78961	16.7612	1.06812	0.765799	3.01482	0.093134	2.81926	0.935136	574.046	15.4842	577.35	13.2767	591.338	23.1388	574.046	15.4842
	EC1635_Spot 43	95.218	15503.9	4.30324	15.9468	1.26006	0.812194	3.22644	0.0939772	2.97021	0.920585	579.016	16.4483	603.684	14.6838	698.354	26.8214	579.016	16.4483
	EC1635_Spot 101	319.494	16409.7	7.96921	16.3613	1.2301	0.793778	3.50128	0.0942335	3.27808	0.936253	580.526	18.1985	593.312	15.7334	643.47	26.4533	580.526	18.1985
	EC1635_Spot 93	68.9148	24106	0.863345	16.195	1.45055	0.824127	3.19228	0.0968417	2.84369	0.890801	595.873	16.1852	610.348	14.6454	665.397	31.0464	595.873	16.1852
	EC1635_Spot 29	75.5305	10517.7	2.8533	16.203	1.27512	0.893082	3.09391	0.104996	2.81893	0.911121	643.624	17.267	648.024	14.8215	664.336	27.3049	643.624	17.267
	EC1635_Spot 77	158.178	16426.7	1.1514	16.088	1.10073	0.963856	3.20147	0.112513	3.0063	0.939036	687.326	19.5997	685.292	15.9558	679.529	23.5309	687.326	19.5997
	EC1635_Spot 37	511.292	178081	7.10533	15.9511	1.00808	1.01185	2.7694	0.11711	2.57941	0.931396	713.908	17.4316	709.809	14.1438	697.794	21.4761	713.908	17.4316
	EC1635_Spot 119	284.172	51903.4	3.49269	14.9432	0.798093	1.15795	2.9797	0.125552	2.87083	0.963462	762.439	20.6436	780.991	16.2364	835.262	16.6202	762.439	20.6436
	EC1635_Spot 78	152.555	34740.3	3.05548	14.2941	0.998069	1.21668	3.55787	0.126189	3.41501	0.959847	766.089	24.6674	808.256	19.8312	927.141	20.498	766.089	24.6674
	EC1635_Spot 38	200.678	126904	5.18116	15.0042	0.901986	1.17579	2.41162	0.128006	2.23659	0.927422	776.481	16.3616	789.352	13.2336	826.809	18.8193	776.481	16.3616
	EC1635_Spot 120	158.54	34556.2	1.88945	14.4194	1.07375	1.29828	2.54916	0.135833	2.31199	0.906959	821.053	17.8235	844.963	14.6225	909.18	22.0946	821.053	17.8235
	EC1635_Spot 24	159.703	26880.1	3.32307	13.9825	0.807529	1.58767	3.35299	0.161076	3.25429	0.970565	962.756	29.1038	965.382	20.8917	972.236	16.48	972.236	16.48
	EC1635_Spot 50	266.713	46248	3.84863	13.8464	1.1629	1.43635	3.61866	0.144306	3.42671	0.946956	868.967	27.8574	904.199	21.6652	992.186	23.6449	992.186	23.6449
	EC1635_Spot 88	64.4733	12932.4	1.75367	13.6906	1.18589	1.67457	3.13254	0.166346	2.89939	0.925572	991.947	26.6571	998.922	19.9174	1015.13	24.0096	1015.13	24.0096
	EC1635_Spot 104	729.726	68042.4	3.78207	13.5588	0.83134	1.49524	2.89163	0.147102	2.76955	0.957781	884.699	22.8953	928.45	17.596	1034.7	16.8131	1034.7	16.8131
	EC1635_Spot 76	223.658	36379.6	1.84767	13.5322	0.939888	1.67636	2.66945	0.164597	2.49851	0.935966	982.276	22.764	999.601	16.9791	1038.66	18.995	1038.66	18.995
	EC1635_Spot 89	105.077	18526.4	2.29553	13.5276	1.01625	1.68171	2.85443	0.165067	2.6674	0.934476	984.873	24.3622	1001.63	18.1776	1039.35	20.5355	1039.35	20.5355
	EC1635_Spot 60	68.5733	31443.7	2.0114	13.4769	1.23328	1.83935	2.8154	0.179863	2.53091	0.898951	1066.23	24.8718	1059.63	18.521	1046.96	24.8882	1046.96	24.8882
	EC1635_Spot 40	403.399	36509.5	4.03425	13.4618	0.835684	1.82499	3.40993	0.178258	3.30595	0.969505	1057.45	32.2424	1054.48	22.3712	1049.23	16.8636	1049.23	16.8636
	EC1635_Spot 91	885.237	360387	3.92213	13.278	0.981356	1.70604	2.693	0.164365	2.50783	0.931239	980.991	22.8212	1010.8	17.241	1076.87	19.6973	1076.87	19.6973
	EC1635_Spot 105	161.647	37850.1	2.26464	13.1874	1.09209	1.76745	3.10289	0.169119	2.90436	0.936015	1007.25	27.0835	1033.58	20.1243	1090.57	21.8588	1090.57	21.8588
	EC1635_Spot 1	324.629	17955.8	1.70784	12.9786	0.910517	1.88751	2.72696	0.177748	2.57047	0.942611	1054.66	25.0083	1076.71	18.1018	1122.5	18.1546	1122.5	18.1546
	EC1635_Spot 14	316.022	1.99979e+06	3.16994	12.7892	0.884011	2.02855	2.98738	0.188241	2.85359	0.955214	1111.84	29.1422	1125.13	20.3202	1151.72	17.5499	1151.72	17.5499
	EC1635_Spot 27	44.4303	27819.5	1.10244	12.2456	1.15386	2.36249	2.6913	0.209913	2.4314	0.903429	1228.35	27.1933	1231.34	19.2023	1237.43	22.6316	1237.43	22.6316
	EC1635_Spot 63	12.5376	5209.1	1.9152	11.5851	1.5788	2.76659	3.25611	0.232559	2.84774	0.874584	1347.9	34.6377	1346.57	24.2889	1345.29	30.4901	1345.29	30.4901
	EC1635_Spot 5	118.873	16987.4	1.90648	11.1314	1.09366	3.05883	3.57207	0.247054	3.40053	0.951977	1423.27	43.4288	1422.45	27.3407	1422.03	20.8972	1422.03	20.8972
	EC1635_Spot 6	627.715	1.17004e+06	5.17473	9.91399	0.883757	3.23023	2.99659	0.232365	2.86331	0.955522	1346.88	34.8034	1464.44	23.2382	1640.12	16.4065	1640.12	16.4065
	EC1635_Spot 68	145.04	231743	2.79108	9.22718	1.20928	4.07794	2.90453	0.273022	2.64082	0.909208	1556.12	36.511	1649.9	23.6885	1772.27	22.0773	1772.27	22.0773
	EC1635_Spot 56	47.0023	11986.3	1.04595	9.02063	0.878059	4.85042	2.7136	0.317471	2.56761	0.946202	1777.37	39.8856	1793.69	22.8476	1813.5	15.9484	1813.5	15.9484
	EC1635_Spot 85	128.567	18186	1.1344	8.81406	1.00928	4.96374	2.13421	0.317448	1.88048	0.881113	1777.25	29.2099	1813.17	18.0386	1855.46	18.2388	1855.46	18.2388
	EC1635_Spot 70	451.396	1.36145e+06	9.62095	8.73543	1.09736	4.71688	3.31155	0.29897	3.12444	0.9435	1686.2	46.3582	1770.24	27.7501	1871.64	19.7901	1871.64	19.7901
	EC1635_Spot 53	66.3952	33255.8	2.49649	7.76624	1.12479	5.85245	3.42589	0.329789	3.23598	0.944567	1837.36	51.7353	1954.21	29.718	2081.13	19.7965	2081.13	19.7965
	EC1635_Spot 36	53.421	16908.1	3.45542	5.34758	1.20441	13.2011	2.47221	0.512217	2.15898	0.873302	2666.09	47.1428	2694.13	23.3389	2715.95	19.8565	2715.95	19.8565
8	EC1580
	EC1580_Spot 40	179.782	15758.6	3.28954	20.8003	1.24342	0.126152	2.7264	0.0190393	2.42635	0.889946	121.581	2.92234	120.634	3.1011	103.034	29.386	121.581	2.92234
	EC1580_Spot 53	79.9352	18373.7	3.83478	20.5367	2.02807	0.128591	2.75357	0.0191615	1.86255	0.676414	122.354	2.25743	122.831	3.18568	133.099	47.6617	122.354	2.25743
	EC1580_Spot 104	85.4281	12082.7	3.9966	21.0658	2.22051	0.125717	3.2183	0.0192159	2.32955	0.723844	122.698	2.83129	120.242	3.64942	72.9729	52.8107	122.698	2.83129
	EC1580_Spot 97	203.524	24800.2	8.50417	21.1517	1.35836	0.128058	2.72676	0.0196534	2.36434	0.867087	125.465	2.93774	122.351	3.14306	63.2504	32.352	125.465	2.93774
	EC1580_Spot 33	79.8618	80521.6	1.59407	20.7405	1.31781	0.135523	2.5219	0.0203948	2.15019	0.85261	130.15	2.77043	129.048	3.05615	109.844	31.1314	130.15	2.77043
	EC1580_Spot 66	153.019	14202.8	1.40831	19.2859	2.49432	0.146104	3.55447	0.020445	2.53231	0.71243	130.468	3.27064	138.466	4.60092	278.887	57.1003	130.468	3.27064
	EC1580_Spot 23	75.3518	247897	2.95746	20.7258	2.12795	0.139027	3.70542	0.0209073	3.03347	0.818657	133.388	4.0047	132.177	4.59235	111.518	50.2337	133.388	4.0047
	EC1580_Spot 37	223.641	92104.4	1.76529	20.4536	1.19171	0.140955	2.66636	0.0209188	2.38522	0.894562	133.46	3.1506	133.894	3.34473	142.638	27.9688	133.46	3.1506
	EC1580_Spot 34	231.557	57910.4	2.72432	20.3241	1.1764	0.142774	2.72564	0.0210547	2.4587	0.902063	134.318	3.26831	135.512	3.45771	157.49	27.5235	134.318	3.26831
	EC1580_Spot 83	80.2962	5222.58	2.41368	21.7333	3.2595	0.135384	3.92702	0.0213493	2.19023	0.557733	136.178	2.95132	128.925	4.75469	NA	NA	136.178	2.95132
	EC1580_Spot 93	54.803	13839.8	1.97899	21.0052	2.28611	0.148323	3.58542	0.022606	2.76205	0.770356	144.105	3.93608	140.43	4.70237	79.7721	54.2903	144.105	3.93608
	EC1580_Spot 10	48.7408	7743.77	2.36003	20.9931	3.31465	0.150484	4.08748	0.022922	2.39178	0.585148	146.097	3.45501	142.339	5.42874	81.1466	78.7127	146.097	3.45501
	EC1580_Spot 14	144.745	102461	1.87121	20.2991	1.38754	0.156096	2.68519	0.0229909	2.29891	0.856145	146.531	3.33062	147.28	3.68133	160.367	32.4584	146.531	3.33062
	EC1580_Spot 4	153.912	7581.95	3.08724	21.1655	1.15456	0.157472	2.40858	0.0241834	2.11382	0.877621	154.041	3.21756	148.488	3.32725	61.7302	27.5113	154.041	3.21756
	EC1580_Spot 82	64.1006	55088.5	2.32877	20.6212	1.74849	0.16764	2.49178	0.025083	1.77532	0.71247	159.701	2.80036	157.369	3.63253	123.404	41.1835	159.701	2.80036
	EC1580_Spot 74	371.825	99719.5	1.99958	20.383	0.999433	0.170165	1.82284	0.0251667	1.52443	0.836293	160.227	2.41245	159.562	2.69156	150.744	23.3976	160.227	2.41245
	EC1580_Spot 38	48.0748	3756.76	2.31267	22.2163	2.14804	0.156171	2.88356	0.0251744	1.92375	0.667146	160.275	3.04529	147.346	3.95493	NA	NA	160.275	3.04529
	EC1580_Spot 1	218.928	401172	2.52133	20.9163	1.27838	0.170365	2.24504	0.0258555	1.84552	0.822045	164.557	2.9985	159.735	3.31828	89.8756	30.2801	164.557	2.9985
	EC1580_Spot 85	61.7477	18262.3	1.7104	20.8693	1.80938	0.1737	2.90705	0.0263025	2.27532	0.78269	167.365	3.75909	162.625	4.36846	95.1758	42.8302	167.365	3.75909
	EC1580_Spot 41	591.058	175361	2.08521	19.1843	1.1805	0.191062	2.8906	0.0265954	2.63856	0.912806	169.205	4.40649	177.535	4.70827	290.92	26.9457	169.205	4.40649
	EC1580_Spot 11	342.609	50106.9	3.99653	20.3719	1.01712	0.185653	2.2868	0.0274423	2.04816	0.895641	174.52	3.5265	172.913	3.63584	152.009	23.807	174.52	3.5265
	EC1580_Spot 2	65.8743	4863.4	2.73985	20.8063	1.86899	0.182832	2.80766	0.0276017	2.0952	0.746243	175.52	3.62789	170.495	4.40664	102.347	44.1953	175.52	3.62789
	EC1580_Spot 29	122.043	67755.4	1.51981	20.079	1.22901	0.199594	2.61674	0.0290789	2.31016	0.88284	184.781	4.20814	184.783	4.42085	185.796	28.6288	184.781	4.20814
	EC1580_Spot 70	581.997	269279	3.2989	19.5117	0.776686	0.25355	2.31342	0.0358961	2.17915	0.941958	227.345	4.86784	229.456	4.75128	252.17	17.8447	227.345	4.86784
	EC1580_Spot 36	483.858	92232.2	39.7109	19.6263	0.908096	0.253566	2.15086	0.0361091	1.94975	0.906502	228.67	4.38036	229.469	4.41761	238.67	20.9409	228.67	4.38036
	EC1580_Spot 106	92.9667	12309.7	4.38352	19.5672	1.66797	0.255034	3.04742	0.036209	2.55042	0.83691	229.291	5.74511	230.657	6.28797	245.609	38.4273	229.291	5.74511
	EC1580_Spot 80	72.7745	13492.4	1.17431	19.7991	1.37691	0.253649	2.29341	0.0364391	1.83407	0.799716	230.723	4.1568	229.536	4.71164	218.427	31.8694	230.723	4.1568
	EC1580_Spot 16	113.364	51087.4	12.138	19.7122	1.09517	0.255323	2.49677	0.0365186	2.24376	0.898665	231.217	5.09603	230.891	5.15641	228.566	25.3111	231.217	5.09603
	EC1580_Spot 56	260.792	82638	19.6186	19.8456	1.03831	0.253815	3.0043	0.0365485	2.81917	0.938379	231.403	6.40795	229.67	6.17536	212.954	24.07	231.403	6.40795
	EC1580_Spot 109	219.515	254392	3.02353	20.0151	1.20722	0.252832	2.68795	0.0367179	2.4016	0.893469	232.457	5.48324	228.874	5.50801	193.258	28.0704	232.457	5.48324
	EC1580_Spot 118	304.229	262040	13.0072	19.5059	1.11365	0.260151	2.33115	0.0368197	2.04793	0.878508	233.09	4.68825	234.789	4.8866	252.853	25.6374	233.09	4.68825
	EC1580_Spot 47	257.601	34432.7	9.62126	19.196	1.05509	0.266618	3.1021	0.0371354	2.91715	0.940381	235.052	6.73334	239.986	6.63033	289.557	24.1141	235.052	6.73334
	EC1580_Spot 116	157.52	43674.6	1.25491	19.0681	1.05271	0.269408	2.28323	0.0372741	2.02607	0.88737	235.914	4.69339	242.22	4.92032	304.819	23.9795	235.914	4.69339
	EC1580_Spot 9	364.004	33847.2	3.9281	19.6122	0.971807	0.264445	2.44622	0.0376313	2.24491	0.917703	238.134	5.24835	238.243	5.19476	240.317	22.3962	238.134	5.24835
	EC1580_Spot 63	278.737	25075.6	24.2674	19.5445	0.938624	0.265954	2.53767	0.0377153	2.3577	0.929081	238.656	5.52391	239.453	5.41324	248.293	21.5977	238.656	5.52391
	EC1580_Spot 119	101.044	324699	5.55731	19.1256	1.3223	0.274116	2.3169	0.0380398	1.90251	0.821144	240.671	4.49437	245.979	5.06135	297.918	30.1694	240.671	4.49437
	EC1580_Spot 13	289.653	63424.9	4.51972	19.7772	0.821015	0.265135	2.15739	0.038047	1.99506	0.924756	240.716	4.71387	238.797	4.59084	220.99	19.0122	240.716	4.71387
	EC1580_Spot 59	115.24	170413	3.99576	19.4352	1.31297	0.270109	2.59235	0.0380904	2.23526	0.862253	240.985	5.28721	242.781	5.59791	261.166	30.1763	240.985	5.28721
	EC1580_Spot 96	233.752	193879	3.76343	19.666	1.00305	0.267368	2.24802	0.0381515	2.01184	0.894937	241.365	4.76609	240.587	4.81548	234.026	23.1611	241.365	4.76609
	EC1580_Spot 117	173.281	43078.8	1.63302	20.0817	1.20482	0.26266	2.6056	0.038272	2.31031	0.886673	242.113	5.48983	236.808	5.50362	185.491	28.0569	242.113	5.48983
	EC1580_Spot 111	246.969	44853.3	6.82903	19.943	1.03305	0.265143	2.60438	0.0383672	2.39073	0.917967	242.704	5.69454	238.803	5.54216	201.613	24.0054	242.704	5.69454
	EC1580_Spot 115	455.542	75627.3	13.9307	19.5027	0.879263	0.272543	2.23797	0.0385672	2.05801	0.919588	243.946	4.92663	244.725	4.86689	253.208	20.2005	243.946	4.92663
	EC1580_Spot 99	161.372	57099.3	14.8692	19.5823	1.14618	0.271951	2.23361	0.0386405	1.9171	0.858297	244.401	4.59769	244.252	4.84909	243.83	26.395	244.401	4.59769
	EC1580_Spot 91	454.919	967817	7.16027	19.8099	0.955526	0.269592	2.22489	0.0387504	2.00925	0.90308	245.083	4.8319	242.367	4.79716	217.145	22.1207	245.083	4.8319
	EC1580_Spot 69	186.378	95095	4.96429	19.5977	0.984455	0.273541	2.23355	0.038897	2.0049	0.897626	245.993	4.83899	245.521	4.87124	242.01	22.6788	245.993	4.83899
	EC1580_Spot 100	121.264	118599	2.03486	19.5736	1.22359	0.276444	2.60113	0.0392613	2.29537	0.88245	248.253	5.58999	247.833	5.72007	244.844	28.1764	248.253	5.58999
	EC1580_Spot 92	112.888	25952.2	7.60361	19.956	1.26127	0.271524	2.21218	0.039316	1.81739	0.821541	248.592	4.43189	243.911	4.79664	200.087	29.29	248.592	4.43189
	EC1580_Spot 112	72.7502	10442.1	1.05453	20.1913	1.23116	0.269453	2.14851	0.0394762	1.76078	0.819534	249.585	4.31066	242.256	4.6306	172.799	28.747	249.585	4.31066
	EC1580_Spot 105	122.01	156136	1.22232	19.9348	1.07578	0.273818	2.24105	0.0396061	1.96597	0.877251	250.391	4.82823	245.741	4.89147	202.568	24.9798	250.391	4.82823
	EC1580_Spot 45	115.838	45185.2	1.22429	19.477	1.27631	0.281829	2.82073	0.0398287	2.51546	0.891777	251.771	6.21112	252.107	6.29727	256.216	29.3211	251.771	6.21112
	EC1580_Spot 8	272.113	47024	2.21063	19.3421	1.19313	0.28498	2.53164	0.039995	2.23285	0.88198	252.802	5.53546	254.6	5.70103	272.169	27.3388	252.802	5.53546
	EC1580_Spot 114	245.227	842061	1.31854	19.5243	1.06179	0.283357	2.45127	0.0401418	2.20938	0.901318	253.712	5.49658	253.317	5.49556	250.64	24.4139	253.712	5.49658
	EC1580_Spot 39	196.156	197185	1.63206	19.5495	1.20092	0.286776	2.61743	0.0406786	2.32567	0.888531	257.038	5.86024	256.019	5.92311	247.717	27.6349	257.038	5.86024
	EC1580_Spot 67	222.227	118314	7.80782	19.8819	1.08056	0.28564	2.23171	0.0412063	1.95267	0.874966	260.306	4.98167	255.122	5.03467	208.741	25.0766	260.306	4.98167
	EC1580_Spot 57	172.588	105352	1.90394	19.5986	1.09629	0.293375	2.65242	0.0417191	2.41526	0.910587	263.48	6.23544	261.212	6.10909	241.928	25.2556	263.48	6.23544
	EC1580_Spot 77	178.624	30967.2	1.57367	19.5105	0.968605	0.296985	2.85941	0.0420426	2.69036	0.940879	265.481	6.99732	264.042	6.64831	252.317	22.281	265.481	6.99732
	EC1580_Spot 84	185.378	45098.9	2.82239	17.1112	1.19304	0.343754	3.14711	0.0426792	2.91221	0.92536	269.418	7.68435	300.012	8.17485	546.323	26.0739	269.418	7.68435
	EC1580_Spot 64	148.18	2.23044e+07	0.813365	19.4723	1.0955	0.30717	2.71601	0.0433994	2.48527	0.915046	273.869	6.66385	271.985	6.48058	256.801	25.202	273.869	6.66385
	EC1580_Spot 22	270.045	26780.1	22.4109	17.2434	1.3567	0.360378	2.68214	0.0450889	2.31371	0.862636	284.3	6.43494	312.497	7.21469	529.52	29.7167	284.3	6.43494
	EC1580_Spot 113	87.6371	80533.2	1.77437	20.2945	1.49277	0.313223	2.89195	0.0461232	2.4769	0.856479	290.676	7.03984	276.676	7.00395	160.933	34.9166	290.676	7.03984
	EC1580_Spot 89	444.889	312502	6.8863	18.3118	0.966301	0.376114	2.50793	0.0499733	2.31429	0.922792	314.357	7.10062	324.175	6.96012	396.256	21.6659	314.357	7.10062
	EC1580_Spot 72	413.446	465015	5.11313	18.7842	1.04302	0.380255	2.87025	0.0518269	2.67404	0.931637	325.728	8.49369	327.226	8.02925	338.863	23.6058	325.728	8.49369
	EC1580_Spot 5	82.3793	59138.2	2.15293	18.9358	1.48781	0.40942	2.8278	0.0562521	2.40476	0.8504	352.792	8.25586	348.457	8.34098	320.671	33.8083	352.792	8.25586
	EC1580_Spot 79	231.157	69594.5	8.64741	18.1971	0.885377	0.489577	3.53226	0.0646415	3.4195	0.968077	403.792	13.3841	404.622	11.7885	410.32	19.8022	403.792	13.3841
	EC1580_Spot 28	49.0755	43551.6	2.5777	17.9982	1.09758	0.543563	2.70148	0.0709851	2.46847	0.913746	442.088	10.547	440.771	9.65985	434.848	24.4505	442.088	10.547
	EC1580_Spot 120	416.085	114297	85.5243	17.2139	0.844238	0.660772	2.39249	0.0825311	2.23858	0.935672	511.213	11.0019	515.086	9.66572	533.256	18.4961	511.213	11.0019
	EC1580_Spot 35	106.408	36340.7	2.20238	17.295	1.11399	0.659058	2.45736	0.0827049	2.19036	0.891345	512.248	10.7859	514.038	9.91232	522.939	24.4355	512.248	10.7859
	EC1580_Spot 31	84.4468	55055.6	1.38379	17.2579	1.18615	0.671623	2.65004	0.0841011	2.36976	0.894235	520.556	11.851	521.699	10.8115	527.681	25.9943	520.556	11.851
	EC1580_Spot 12	219.565	115617	1.89217	16.4612	0.955698	0.858673	2.46787	0.10256	2.27531	0.921972	629.394	13.6438	629.398	11.577	630.372	20.5875	629.394	13.6438
	EC1580_Spot 19	498.666	134676	10.8508	15.554	0.808984	0.981277	1.9835	0.110744	1.81103	0.913046	677.069	11.6399	694.26	9.97522	751.236	17.0642	677.069	11.6399
	EC1580_Spot 71	77.9842	108149	2.10281	15.4203	0.940338	1.11005	2.07673	0.1242	1.85164	0.891614	754.695	13.1873	758.196	11.0937	769.434	19.8001	754.695	13.1873
	EC1580_Spot 110	56.2384	31365.3	3.76782	14.1948	0.880128	1.23915	2.51584	0.127626	2.35687	0.936811	774.31	17.1961	818.494	14.1378	941.462	18.0169	774.31	17.1961
	EC1580_Spot 3	111.957	106690	1.98153	13.8889	0.865872	1.49381	2.17843	0.15054	1.99895	0.917613	903.989	16.8606	927.871	13.2504	985.955	17.6116	985.955	17.6116
	EC1580_Spot 86	160.798	104502	2.14177	13.8863	0.885403	1.36547	2.22152	0.137581	2.03746	0.917144	830.967	15.8848	874.222	13.0218	986.301	18.0062	986.301	18.0062
	EC1580_Spot 101	38.2417	40194.9	2.43998	13.582	1.07252	1.77756	2.11227	0.175177	1.81972	0.8615	1040.57	17.4863	1037.29	13.7267	1031.23	21.6979	1031.23	21.6979
	EC1580_Spot 24	96.6476	645524	2.24774	13.5106	0.792323	1.64574	2.2297	0.161333	2.08417	0.934733	964.181	18.6646	987.918	14.0837	1041.88	16.0085	1041.88	16.0085
	EC1580_Spot 55	243.664	299554	6.43477	13.4249	0.757625	1.69403	2.3287	0.165014	2.20201	0.945596	984.582	20.1062	1006.28	14.8694	1054.75	15.2781	1054.75	15.2781
	EC1580_Spot 20	91.1221	730017	4.91953	13.4202	0.910217	1.86913	2.41281	0.182006	2.23454	0.926114	1077.92	22.1806	1070.22	15.9617	1055.46	18.3507	1055.46	18.3507
	EC1580_Spot 65	43.7155	43675.9	2.2786	13.3657	0.969458	1.87647	2.31292	0.181979	2.09994	0.907918	1077.78	20.8419	1072.82	15.3216	1063.64	19.501	1063.64	19.501
	EC1580_Spot 73	132.324	108620	6.86817	13.2463	0.809115	1.90594	3.03254	0.183185	2.9226	0.963749	1084.35	29.1695	1083.17	20.1983	1081.64	16.2126	1081.64	16.2126
	EC1580_Spot 94	116.85	106167	6.68942	13.0386	1.03753	1.92109	2.34053	0.181747	2.098	0.89638	1076.51	20.8003	1088.45	15.6308	1113.26	20.7155	1113.26	20.7155
	EC1580_Spot 46	89.7708	134784	2.14546	12.4126	0.824413	2.30391	2.03202	0.207498	1.85727	0.914001	1215.48	20.5741	1213.49	14.3888	1210.82	16.2232	1210.82	16.2232
	EC1580_Spot 103	102.555	228744	2.47664	12.3328	0.797786	2.05395	1.94826	0.183797	1.77743	0.912317	1087.68	17.7899	1133.61	13.3055	1223.48	15.6672	1223.48	15.6672
	EC1580_Spot 75	104.738	190843	4.16102	11.6695	0.774959	2.68198	1.8599	0.227088	1.69076	0.90906	1319.22	20.1707	1323.5	13.7569	1331.27	14.9954	1331.27	14.9954
	EC1580_Spot 90	40.4168	41244.3	1.98279	11.4962	0.957581	2.79527	2.28147	0.233167	2.07079	0.907653	1351.07	25.2406	1354.27	17.0635	1360.15	18.4546	1360.15	18.4546
	EC1580_Spot 87	63.0736	109125	2.23386	11.0067	0.830926	3.09308	2.2763	0.247022	2.11923	0.930995	1423.1	27.062	1430.98	17.468	1443.53	15.8307	1443.53	15.8307
	EC1580_Spot 15	8.05144	38946.3	0.959929	10.8951	1.2621	3.19175	2.53438	0.252318	2.19777	0.867182	1450.42	28.5455	1455.16	19.597	1462.91	23.9833	1462.91	23.9833
	EC1580_Spot 108	64.8677	118398	2.79989	10.6069	0.754141	3.38376	2.05389	0.26042	1.91043	0.930151	1491.99	25.4455	1500.64	16.0989	1513.68	14.2318	1513.68	14.2318
	EC1580_Spot 25	33.3879	84339.2	1.85731	10.5418	0.861553	3.42108	2.28862	0.261677	2.12026	0.926437	1498.42	28.3484	1509.25	17.9839	1525.29	16.2341	1525.29	16.2341
	EC1580_Spot 81	13.37	67803.3	4.10668	10.5301	1.4746	3.60932	2.90411	0.27577	2.50188	0.861497	1570.02	34.8629	1551.59	23.0943	1527.37	27.7801	1527.37	27.7801
	EC1580_Spot 30	175.731	1.6316e+07	3.02695	10.485	0.862875	3.40979	2.28307	0.259407	2.11373	0.925828	1486.81	28.0663	1506.65	17.9268	1535.46	16.2388	1535.46	16.2388
	EC1580_Spot 21	222.462	1.21402e+06	3.21748	10.2927	0.831947	3.6065	2.29103	0.269342	2.13464	0.931737	1537.46	29.1992	1550.97	18.2147	1570.21	15.5837	1570.21	15.5837
	EC1580_Spot 32	143.169	192327	3.26699	10.2781	0.833891	3.6947	2.54277	0.275537	2.40215	0.944697	1568.84	33.4509	1570.22	20.322	1572.88	15.6147	1572.88	15.6147
	EC1580_Spot 61	20.377	15263.1	1.04084	10.2701	1.15327	3.79152	3.01356	0.282536	2.78416	0.923875	1604.12	39.5386	1590.95	24.2177	1574.33	21.592	1574.33	21.592
	EC1580_Spot 42	47.6091	92619.8	1.54117	10.2698	1.0291	3.58053	2.42288	0.266807	2.19347	0.905314	1524.58	29.7811	1545.22	19.2329	1574.38	19.2667	1574.38	19.2667
	EC1580_Spot 18	108.967	171766	3.21075	9.73859	0.745415	4.2186	2.37911	0.298094	2.25932	0.949649	1681.85	33.4462	1677.65	19.5305	1673.18	13.7782	1673.18	13.7782
	EC1580_Spot 50	189.181	4.04421e+06	1.27416	9.39781	1.04064	4.45339	2.72857	0.303672	2.52233	0.924415	1709.49	37.8757	1722.33	22.6287	1738.75	19.0775	1738.75	19.0775
	EC1580_Spot 95	90.1052	2.54408e+06	1.34476	9.17019	0.715569	4.37816	1.67203	0.291311	1.51117	0.903796	1648.08	21.9766	1708.23	13.8216	1783.57	13.0445	1783.57	13.0445
	EC1580_Spot 102	82.1858	234234	1.24392	8.77336	0.937172	4.49485	2.57274	0.286133	2.39598	0.931294	1622.18	34.3628	1730.02	21.3722	1863.82	16.9185	1863.82	16.9185
	EC1580_Spot 7	254.315	263302	14.6876	4.74541	0.767982	16.8068	2.84398	0.578689	2.73833	0.96285	2943.4	64.7092	2923.87	27.2621	2911.16	12.4421	2911.16	12.4421
9	EC1510
	EC1510_Spot 4	1870.3	293.19	0.678144	19.5421	14.5946	0.000400932	15.8133	5.68253e-05	6.08755	0.384964	0.366309	0.0222986	0.407018	0.0643501	248.573	337.485	0.366309	0.0222986
	EC1510_Spot 110	1131.9	247.932	1.84714	17.4154	14.7505	0.00120866	16.0272	0.000152663	6.26842	0.391111	0.984056	0.06168	1.22651	0.196456	507.739	325.988	0.984056	0.06168
	EC1510_Spot 22	272.413	1906.8	1.84174	23.3044	9.68317	0.033512	9.87966	0.00566417	1.96059	0.198447	36.4106	0.711849	33.4697	3.2528	172.787	241.784	36.4106	0.711849
	EC1510_Spot 103	471.177	2469.3	1.10951	21.5507	2.7777	0.037471	3.19279	0.00585672	1.57426	0.493067	37.6447	0.590899	37.3519	1.1709	18.5939	66.7298	37.6447	0.590899
	EC1510_Spot 117	373.063	2612.02	1.18177	21.8229	4.981	0.037668	5.40427	0.00596187	2.09662	0.387957	38.3186	0.801013	37.5447	1.99196	11.6368	120.375	38.3186	0.801013
	EC1510_Spot 68	244.304	2033.78	1.21916	15.1507	6.22192	0.0576398	6.57634	0.00633365	2.12978	0.323854	40.7006	0.8641	56.9019	3.63916	806.468	130.349	40.7006	0.8641
	EC1510_Spot 21	173.549	818.747	1.6316	29.2689	9.32526	0.0309147	9.7201	0.00656252	2.74223	0.28212	42.1665	1.15253	30.9148	2.95968	776.205	263.658	42.1665	1.15253
	EC1510_Spot 61	253.101	1312.24	2.42641	24.2037	3.5196	0.0375762	4.30926	0.00659621	2.48638	0.576985	42.3823	1.05033	37.4549	1.58462	268.045	89.4069	42.3823	1.05033
	EC1510_Spot 83	178.658	2942.83	1.32782	20.9168	2.41244	0.0440587	3.55844	0.00668384	2.61585	0.73511	42.9434	1.1196	43.779	1.52474	89.8244	57.1746	42.9434	1.1196
	EC1510_Spot 120	631.077	2741.46	1.14359	23.0773	1.92389	0.040813	2.69578	0.00683096	1.88835	0.700486	43.8855	0.825898	40.6175	1.07335	148.435	47.7228	43.8855	0.825898
	EC1510_Spot 26	253.115	2033.21	3.15652	24.8475	5.87046	0.039353	6.20949	0.00709184	2.02371	0.325907	45.5556	0.918665	39.1922	2.38727	335.156	151.213	45.5556	0.918665
	EC1510_Spot 40	150.627	1297.83	1.62695	24.2543	4.62947	0.0403422	5.52752	0.00709653	3.02018	0.54639	45.5856	1.37191	40.1581	2.17643	273.343	117.747	45.5856	1.37191
	EC1510_Spot 76	998.827	12162.6	2.40656	20.3801	1.21057	0.0725713	2.11177	0.0107268	1.73035	0.819382	68.7811	1.18383	71.1366	1.45083	151.062	28.3672	68.7811	1.18383
	EC1510_Spot 85	638.885	7152.28	1.22302	20.9498	1.224	0.0786813	2.20663	0.011955	1.83604	0.832056	76.6099	1.39826	76.9044	1.63432	86.0865	29.0527	76.6099	1.39826
	EC1510_Spot 64	825.545	13948.6	1.89225	20.3177	0.976304	0.0811691	2.23946	0.0119609	2.01544	0.899968	76.6473	1.53563	79.2435	1.70714	158.24	22.8344	76.6473	1.53563
	EC1510_Spot 112	917.772	12836.1	1.59036	20.7949	1.03971	0.0801952	2.11676	0.012095	1.84382	0.871057	77.5014	1.42043	78.3285	1.59569	103.631	24.6015	77.5014	1.42043
	EC1510_Spot 43	837.412	9719.09	3.58665	20.1595	1.90647	0.0837556	2.65794	0.0122459	1.85203	0.696791	78.4629	1.44435	81.6697	2.08573	176.477	44.4471	78.4629	1.44435
	EC1510_Spot 58	239.41	12481.4	5.08781	18.3147	1.39987	0.234361	3.6324	0.0311303	3.35181	0.922756	197.618	6.52331	213.792	7.00282	395.902	31.3891	197.618	6.52331
	EC1510_Spot 20	473.88	21213.5	2.18243	19.2249	0.907739	0.2508	2.498	0.0349695	2.32723	0.931639	221.576	5.06898	227.226	5.08588	286.104	20.7719	221.576	5.06898
	EC1510_Spot 63	131.545	109222	2.03293	18.5774	1.55619	0.260988	3.2557	0.0351645	2.8597	0.878367	222.79	6.2623	235.463	6.84213	363.875	35.0781	222.79	6.2623
	EC1510_Spot 119	438.109	99863.4	3.44662	19.2864	0.968932	0.255433	2.3453	0.0357295	2.1358	0.910669	226.308	4.74962	230.98	4.84525	278.819	22.1945	226.308	4.74962
	EC1510_Spot 5	201.665	4852.17	2.97088	19.822	1.96132	0.24919	3.6437	0.0358243	3.0708	0.842768	226.898	6.84639	225.918	7.38046	215.739	45.4292	226.898	6.84639
	EC1510_Spot 116	530.519	3.03762e+06	17.3082	19.1845	1.01964	0.258151	2.11612	0.0359189	1.85427	0.876258	227.487	4.14465	233.176	4.40874	290.892	23.3117	227.487	4.14465
	EC1510_Spot 72	565.703	13899.6	2.24141	19.8095	0.833148	0.251165	1.71456	0.0360853	1.49853	0.874001	228.522	3.36448	227.522	3.49486	217.219	19.293	228.522	3.36448
	EC1510_Spot 29	294.087	22659.6	2.74661	19.6099	1.06153	0.256616	2.73238	0.0364971	2.51775	0.921448	231.083	5.71505	231.936	5.66575	240.587	24.4669	231.083	5.71505
	EC1510_Spot 69	202.97	16932.4	1.55812	17.5353	1.4215	0.289245	2.38442	0.0367856	1.91437	0.802866	232.877	4.37858	257.965	5.43186	492.61	31.3438	232.877	4.37858
	EC1510_Spot 57	318.96	12396.8	5.82174	18.9706	1.39647	0.274568	2.41586	0.0377772	1.97136	0.816007	239.04	4.62604	246.339	5.28435	316.446	31.7469	239.04	4.62604
	EC1510_Spot 2	228.848	12080	3.06559	19.3317	1.2723	0.270052	2.72831	0.0378631	2.41349	0.884609	239.574	5.67596	242.736	5.89053	273.407	29.1508	239.574	5.67596
	EC1510_Spot 24	405.768	25079.7	1.12835	19.1114	0.89787	0.284043	2.46035	0.0393709	2.29067	0.931033	248.932	5.59351	253.86	5.52632	299.611	20.4786	248.932	5.59351
	EC1510_Spot 48	341.165	6447.45	1.85588	19.8344	0.836372	0.274067	1.91512	0.0394252	1.72284	0.899597	249.269	4.21253	245.94	4.18305	214.31	19.3727	249.269	4.21253
	EC1510_Spot 3	32.4705	3670.53	1.31102	19.0519	4.29978	0.364006	6.28541	0.0502976	4.58457	0.729398	316.348	14.1531	315.201	17.0332	306.737	97.9845	316.348	14.1531
	EC1510_Spot 111	212.927	199976	3.32716	17.7586	1.05864	0.443349	8.72378	0.0571022	8.65931	0.99261	357.978	30.1537	372.611	27.2153	464.626	23.4772	357.978	30.1537
	EC1510_Spot 115	370.811	86811.3	4.85878	16.254	1.04186	0.498785	2.27378	0.0587993	2.02104	0.888845	368.319	7.23521	410.88	7.68353	657.598	22.3226	368.319	7.23521
	EC1510_Spot 87	197.824	46130.1	2.0397	17.7094	0.806079	0.512429	2.26582	0.0658168	2.11759	0.934579	410.904	8.42973	420.081	7.79512	470.805	17.8448	410.904	8.42973
	EC1510_Spot 75	397.536	44909.3	4.31334	18.0803	0.604632	0.51743	1.80949	0.0678511	1.70549	0.942522	423.196	6.98575	423.433	6.2652	424.702	13.4889	423.196	6.98575
	EC1510_Spot 11	55.0351	12645.2	1.6855	16.7586	1.39038	0.670105	3.9308	0.0814477	3.67668	0.935353	504.758	17.8504	520.776	16.0157	591.656	30.1446	504.758	17.8504
	EC1510_Spot 47	243.351	69169.6	0.724136	16.9984	0.751003	0.673559	2.25729	0.0830388	2.1287	0.943033	514.236	10.5213	522.874	9.22496	560.761	16.3758	514.236	10.5213
	EC1510_Spot 84	248.063	40318	0.961797	17.1027	0.838581	0.674255	2.03245	0.0836349	1.85139	0.910914	517.783	9.21132	523.296	8.31119	547.409	18.2971	517.783	9.21132
	EC1510_Spot 79	564.064	1.31414e+06	1.78551	17.0068	0.653271	0.689072	1.72088	0.0849936	1.59206	0.925145	525.861	8.03967	532.243	7.1286	559.676	14.2213	525.861	8.03967
	EC1510_Spot 86	220.11	52616.7	1.77194	16.7975	0.911609	0.729141	1.83573	0.0888291	1.59339	0.867984	548.609	8.37983	556.049	7.86012	586.643	19.7613	548.609	8.37983
	EC1510_Spot 49	71.2629	8833.57	1.80337	16.5042	1.26805	0.766031	3.54253	0.0916939	3.30781	0.933741	565.547	17.9101	577.484	15.6036	624.708	27.3478	565.547	17.9101
	EC1510_Spot 46	40.9818	5141.51	1.74249	16.9544	1.74662	0.751552	4.07518	0.0924144	3.6819	0.903494	569.8	20.0791	569.125	17.7565	566.448	38.0112	569.8	20.0791
	EC1510_Spot 37	123.633	29427.8	1.61949	16.8382	0.821883	0.773754	2.61086	0.0944924	2.47813	0.94916	582.051	13.792	581.914	11.5649	581.38	17.8554	582.051	13.792
	EC1510_Spot 45	299.934	47956.1	1.26845	16.7117	0.800772	0.789074	2.13197	0.0956392	1.97587	0.926781	588.802	11.1185	590.646	9.548	597.742	17.3325	588.802	11.1185
	EC1510_Spot 50	150.22	24703.4	1.15325	16.308	0.771889	0.831883	2.36052	0.0983921	2.23075	0.945024	604.979	12.8817	614.656	10.8847	650.488	16.5591	604.979	12.8817
	EC1510_Spot 91	74.437	11736.3	1.68041	16.3708	1.40733	0.845875	3.1847	0.100433	2.85688	0.897063	616.944	16.8083	622.382	14.8195	642.226	30.2695	616.944	16.8083
	EC1510_Spot 106	101.204	19027.1	1.27377	15.9658	0.939107	0.883223	2.65093	0.102273	2.47901	0.935148	627.715	14.8275	642.722	12.6246	695.825	19.9926	627.715	14.8275
	EC1510_Spot 1	148.379	15609.9	3.00096	16.3899	0.891392	0.867406	3.14948	0.103109	3.0207	0.959112	632.603	18.2014	634.158	14.8554	639.725	19.1925	632.603	18.2014
	EC1510_Spot 82	480.549	81017.4	2.61558	15.5781	0.780648	0.966506	2.05659	0.109199	1.90266	0.925157	668.094	12.0751	686.661	10.2636	747.962	16.4745	668.094	12.0751
	EC1510_Spot 30	175.935	42363.8	1.42362	15.7357	0.836909	0.961679	2.11329	0.109753	1.94051	0.918241	671.311	12.3715	684.166	10.5198	726.661	17.7444	671.311	12.3715
	EC1510_Spot 34	117.73	52890.5	1.24053	15.6632	1.03491	0.997819	2.91433	0.113353	2.72438	0.934824	692.19	17.8808	702.702	14.7807	736.478	21.9043	692.19	17.8808
	EC1510_Spot 105	208.8	20711.9	1.8713	15.5327	0.893854	1.02978	2.88829	0.116008	2.7465	0.950908	707.548	18.4044	718.817	14.8798	754.128	18.848	707.548	18.4044
	EC1510_Spot 18	243.287	37232	1.27619	15.2409	0.802542	1.06129	2.03179	0.117312	1.86657	0.918684	715.073	12.6337	734.458	10.6223	794.032	16.8518	715.073	12.6337
	EC1510_Spot 16	106.452	39745.8	1.68395	15.5064	1.02441	1.05054	3.13754	0.118147	2.96559	0.945197	719.89	20.2002	729.151	16.323	757.706	21.5907	719.89	20.2002
	EC1510_Spot 62	161.318	37727.7	1.21991	15.2488	1.07313	1.10539	2.96629	0.122251	2.76537	0.932266	743.505	19.4193	755.956	15.8148	792.947	22.5306	743.505	19.4193
	EC1510_Spot 78	62.7703	4953.9	2.50168	14.5491	2.05317	1.45038	3.53998	0.153044	2.88374	0.814619	918.004	24.6744	910.03	21.2786	890.752	42.4103	890.752	42.4103
	EC1510_Spot 31	365.903	186486	2.04129	13.9357	0.554455	1.56888	1.80919	0.158568	1.72213	0.951882	948.817	15.1943	957.982	11.2196	979.067	11.3051	979.067	11.3051
	EC1510_Spot 71	401.839	139096	2.0965	13.9063	0.57211	1.62306	1.60739	0.163698	1.50213	0.934515	977.298	13.6217	979.176	10.0993	983.411	11.6625	983.411	11.6625
	EC1510_Spot 95	16.6585	2736.59	2.49927	13.9032	1.94988	1.55408	5.97849	0.156705	5.65158	0.945319	938.442	49.358	952.115	36.9531	983.831	39.6991	983.831	39.6991
	EC1510_Spot 15	225.081	166749	2.76514	13.8848	0.771349	1.59922	2.13126	0.161045	1.98678	0.932208	962.583	17.7651	969.906	13.3155	986.554	15.6777	986.554	15.6777
	EC1510_Spot 33	158.834	48062.9	2.65455	13.8181	0.806383	1.65206	2.48286	0.165567	2.34826	0.94579	987.638	21.5031	990.341	15.7058	996.338	16.3864	996.338	16.3864
	EC1510_Spot 100	239.703	47828.9	3.20052	13.766	0.665497	1.6911	2.01013	0.168839	1.89677	0.943605	1005.71	17.6625	1005.18	12.8267	1003.99	13.4876	1003.99	13.4876
	EC1510_Spot 90	482.33	302925	10.9546	13.6003	0.562454	1.73705	1.76954	0.171341	1.67777	0.94814	1019.49	15.8208	1022.37	11.4035	1028.52	11.3731	1028.52	11.3731
	EC1510_Spot 38	80.5619	10058.7	1.15078	13.5518	0.995211	1.74578	3.39289	0.171587	3.24365	0.956014	1020.85	30.6242	1025.6	21.9074	1035.74	20.1212	1035.74	20.1212
	EC1510_Spot 52	89.5186	19284.9	3.11765	13.5257	0.810956	1.78322	2.03471	0.174929	1.86612	0.917142	1039.21	17.9105	1039.35	13.2377	1039.64	16.389	1039.64	16.389
	EC1510_Spot 92	51.6956	30850.5	2.20316	13.5094	1.20186	1.60654	3.58246	0.157408	3.37485	0.942046	942.359	29.5881	972.763	22.4238	1042.06	24.2726	1042.06	24.2726
	EC1510_Spot 67	187.19	24164.2	1.87314	13.4033	0.559735	1.85689	2.28722	0.180508	2.21767	0.969593	1069.75	21.8597	1065.88	15.096	1058	11.2678	1058	11.2678
	EC1510_Spot 9	333.066	210040	1.24143	13.3055	0.656172	1.79392	2.18357	0.173114	2.08265	0.95378	1029.25	19.812	1043.25	14.2369	1072.72	13.1691	1072.72	13.1691
	EC1510_Spot 19	59.4851	70272.4	2.88201	13.3034	0.839384	1.79132	2.73617	0.172836	2.60424	0.951782	1027.72	24.7398	1042.31	17.8312	1073.04	16.8541	1073.04	16.8541
	EC1510_Spot 14	130.871	20101.1	1.83914	13.2942	0.799833	1.80072	2.78239	0.173622	2.66495	0.957792	1032.04	25.4148	1045.72	18.1665	1074.43	16.0427	1074.43	16.0427
	EC1510_Spot 74	292.567	53719.7	3.07958	13.2616	0.756599	1.93469	2.25277	0.186084	2.12192	0.941915	1100.13	21.4606	1093.16	15.081	1079.32	15.1831	1079.32	15.1831
	EC1510_Spot 8	186.08	22677.4	1.76461	13.2214	0.818182	1.8656	2.11761	0.178893	1.95316	0.922343	1060.93	19.1063	1068.97	13.9993	1085.42	16.4037	1085.42	16.4037
	EC1510_Spot 44	255.078	48970.9	2.94769	13.1124	0.736602	1.92822	1.95086	0.183373	1.80646	0.925978	1085.38	18.0452	1090.92	13.0447	1102.02	14.7503	1102.02	14.7503
	EC1510_Spot 6	148.137	97220.5	3.84151	12.8957	0.806569	1.75064	2.52522	0.163735	2.39295	0.947618	977.5	21.7041	1027.4	16.3204	1135.22	16.0396	1135.22	16.0396
	EC1510_Spot 77	169.163	32821	2.91983	12.8093	0.706432	2.07538	2.93298	0.192807	2.84664	0.97056	1136.56	29.6624	1140.71	20.0999	1148.59	14.0319	1148.59	14.0319
	EC1510_Spot 23	242.073	62527.7	2.49912	12.7749	0.781413	2.13049	2.00568	0.197394	1.8472	0.920984	1161.31	19.6304	1158.74	13.8607	1153.94	15.4896	1153.94	15.4896
	EC1510_Spot 89	140.374	77415.2	3.53991	12.1843	0.749734	2.30123	2.63388	0.203356	2.52492	0.958632	1193.33	27.5063	1212.67	18.6448	1247.26	14.6621	1247.26	14.6621
	EC1510_Spot 17	48.3647	734527	1.30253	12.1631	0.926235	2.15736	4.32974	0.190312	4.22951	0.97685	1123.06	43.5932	1167.42	30.0481	1250.69	18.114	1250.69	18.114
	EC1510_Spot 36	121.534	29307.2	1.03859	11.7325	0.611229	2.72051	2.51216	0.231494	2.43667	0.969949	1342.33	29.5275	1334.07	18.6541	1320.83	11.8444	1320.83	11.8444
	EC1510_Spot 56	218.039	59932.8	2.11261	11.3771	0.719691	2.65674	2.36953	0.21922	2.25759	0.952759	1277.75	26.1676	1316.52	17.482	1380.19	13.8313	1380.19	13.8313
	EC1510_Spot 66	311.643	632856	0.956535	11.2373	0.646771	2.97573	1.7161	0.242525	1.58955	0.92626	1399.81	20.0007	1401.44	13.0428	1403.9	12.3885	1403.9	12.3885
	EC1510_Spot 104	221.415	3.32287e+07	0.750706	11.0855	0.599569	3.05289	2.08184	0.245452	1.99363	0.957631	1414.98	25.3282	1420.96	15.9243	1429.91	11.4439	1429.91	11.4439
	EC1510_Spot 39	174.039	98410	1.52041	10.6444	0.684626	3.43522	2.58696	0.2652	2.49473	0.964346	1516.39	33.7101	1512.49	20.3478	1507.02	12.9312	1507.02	12.9312
	EC1510_Spot 25	21.8672	5404.37	1.3933	10.6096	1.59793	3.29631	7.14457	0.253644	6.96358	0.974668	1457.24	90.8301	1480.18	55.7152	1513.2	30.1606	1513.2	30.1606
	EC1510_Spot 32	457.329	185907	5.74312	10.5902	0.651328	3.21668	2.34453	0.247065	2.25225	0.960637	1423.32	28.7646	1461.19	18.1623	1516.65	12.2865	1516.65	12.2865
	EC1510_Spot 51	27.641	8133.8	1.07618	10.5787	1.15151	3.33415	4.20767	0.255809	4.04703	0.961824	1468.36	53.1443	1489.09	32.8779	1518.7	21.7176	1518.7	21.7176
	EC1510_Spot 107	52.2233	13915.2	0.747455	10.4754	0.610846	3.52958	3.08602	0.268159	3.02496	0.980214	1531.45	41.2346	1533.87	24.4218	1537.18	11.493	1537.18	11.493
	EC1510_Spot 53	134.118	68262.7	2.15873	10.4132	0.650073	3.52262	2.58117	0.26604	2.49797	0.967766	1520.67	33.8383	1532.31	20.4165	1548.38	12.213	1548.38	12.213
	EC1510_Spot 114	201.924	24964	1.2687	10.3625	0.765119	3.54919	2.37191	0.266743	2.24511	0.946544	1524.25	30.4764	1538.25	18.792	1557.54	14.3571	1557.54	14.3571
	EC1510_Spot 108	294.681	84352.5	1.49887	10.1584	0.600443	3.56166	2.47797	0.262408	2.40412	0.970198	1502.15	32.2148	1541.03	19.6476	1594.77	11.2123	1594.77	11.2123
	EC1510_Spot 109	492.742	409610	1.54008	10.0427	0.646476	3.66701	1.97438	0.267092	1.86554	0.944875	1526.03	25.35	1564.22	15.7532	1616.14	12.0369	1616.14	12.0369
	EC1510_Spot 98	344.581	55201.1	1.30074	9.67263	0.617135	4.0975	2.27695	0.28745	2.19172	0.962569	1628.77	31.5456	1653.81	18.5863	1685.74	11.3902	1685.74	11.3902
	EC1510_Spot 7	78.2107	66859.9	1.71661	9.49276	0.698004	4.07957	2.9597	0.28087	2.87622	0.971793	1595.74	40.658	1650.23	24.1406	1720.3	12.8267	1720.3	12.8267
	EC1510_Spot 55	285.04	133878	1.23744	9.46959	0.830758	4.06937	2.03194	0.279484	1.85435	0.912602	1588.76	26.1117	1648.19	16.5635	1724.79	15.2577	1724.79	15.2577
	EC1510_Spot 99	105.997	34968.6	0.969361	9.21174	0.822857	4.77233	2.48138	0.318838	2.34098	0.943416	1784.05	36.4837	1780.04	20.8336	1775.33	15.0159	1775.33	15.0159
	EC1510_Spot 118	307.21	220948	0.753722	8.72022	0.60396	5.2541	1.79926	0.332296	1.69486	0.941979	1849.5	27.2508	1861.44	15.3493	1874.78	10.8898	1874.78	10.8898
	EC1510_Spot 41	154.086	418466	1.78292	8.71432	0.577309	5.32531	2.2912	0.336571	2.21727	0.967736	1870.15	35.9937	1872.93	19.5889	1876	10.4077	1876	10.4077
	EC1510_Spot 102	35.1718	24946.1	0.703089	8.57525	0.815507	5.40314	5.38996	0.336041	5.32791	0.988488	1867.59	86.392	1885.35	46.2135	1904.95	14.6493	1904.95	14.6493
	EC1510_Spot 28	85.6052	46247	0.961917	8.17683	0.724963	6.15264	2.78449	0.364876	2.68846	0.965512	2005.24	46.332	1997.75	24.325	1989.99	12.8927	1989.99	12.8927
	EC1510_Spot 97	187.45	280032	1.77489	7.97355	0.531825	6.40503	2.47795	0.370401	2.4202	0.976697	2031.29	42.1697	2032.96	21.7662	2034.64	9.40861	2034.64	9.40861
	EC1510_Spot 59	156.039	113358	1.44703	7.96972	0.639471	6.34534	2.60969	0.366773	2.53013	0.969514	2014.2	43.7692	2024.74	22.8947	2035.49	11.3124	2035.49	11.3124
	EC1510_Spot 10	19.1278	7816.14	2.16567	7.90813	0.916523	6.7211	5.49594	0.38549	5.41898	0.985997	2101.88	97.2026	2075.4	48.6143	2049.21	16.1892	2049.21	16.1892
	EC1510_Spot 81	156.531	37745	1.55249	7.50453	0.750823	6.32066	3.28317	0.344021	3.19617	0.9735	1905.98	52.7395	2021.32	28.7907	2141.26	13.1248	2141.26	13.1248
	EC1510_Spot 60	30.3336	8004.82	0.873807	6.33852	0.622588	9.33424	4.55579	0.429107	4.51305	0.990618	2301.69	87.3607	2371.39	41.8061	2431.84	10.551	2431.84	10.551
	EC1510_Spot 13	375.59	736728	1.29116	4.17907	0.571286	16.3977	1.94254	0.497005	1.85664	0.955777	2600.91	39.7364	2900.28	18.5926	3115.22	9.09722	3115.22	9.09722
10	EC1513
	EC1513_Spot 16	253.561	1889.73	4.93073	23.9838	8.46628	0.00554726	10.1619	0.00096493	5.62024	0.553068	6.21734	0.349261	5.61703	0.569223	244.917	214.336	6.21734	0.349261
	EC1513_Spot 96	586.364	8616.63	0.936354	20.0797	2.29146	0.0405784	3.05373	0.0059095	2.01854	0.661007	37.9829	0.764445	40.3886	1.20915	185.721	53.3749	37.9829	0.764445
	EC1513_Spot 10	344.875	1219.35	1.19018	27.0636	3.4909	0.0301655	4.56328	0.005921	2.93891	0.644034	38.0567	1.11515	30.1766	1.35678	560.163	94.1326	38.0567	1.11515
	EC1513_Spot 22	202.857	642.498	1.54457	45.7225	7.90269	0.0181193	8.57178	0.00600854	3.32009	0.387328	38.6177	1.27831	18.2333	1.54897	2261.03	316.312	38.6177	1.27831
	EC1513_Spot 75	232.472	1672.05	1.24158	28.019	13.1113	0.0298414	13.5728	0.00606415	3.50904	0.258535	38.974	1.36348	29.8571	3.99346	654.616	361.788	38.974	1.36348
	EC1513_Spot 45	543.376	5294.36	1.90428	21.9682	2.72951	0.0384047	3.95064	0.00611896	2.8561	0.722947	39.3252	1.11975	38.2653	1.48359	27.6999	66.1282	39.3252	1.11975
	EC1513_Spot 70	580.181	1745.23	1.39161	24.273	2.02312	0.0370615	3.43089	0.00652447	2.77091	0.807638	41.9228	1.15788	36.951	1.24496	275.307	51.4579	41.9228	1.15788
	EC1513_Spot 103	318.651	4767.94	1.20105	21.8271	2.93773	0.0413765	4.08228	0.00655011	2.83456	0.694357	42.087	1.1891	41.167	1.64694	12.1107	70.9879	42.087	1.1891
	EC1513_Spot 13	222.824	7309.02	2.54088	21.1719	3.46515	0.0431104	4.44031	0.00661972	2.77652	0.625298	42.5328	1.17704	42.8563	1.86335	61.0144	82.5659	42.5328	1.17704
	EC1513_Spot 118	396.494	3100.27	1.95165	23.0382	3.42526	0.0401915	4.54873	0.00671555	2.99309	0.658004	43.1465	1.2871	40.011	1.78461	144.234	84.9093	43.1465	1.2871
	EC1513_Spot 110	593.819	28988.5	1.69183	21.0994	1.76761	0.0442466	3.014	0.00677094	2.44126	0.809973	43.5012	1.0584	43.9616	1.29673	69.175	42.0573	43.5012	1.0584
	EC1513_Spot 98	384.453	12180.6	1.34663	20.504	2.70605	0.0455915	3.61862	0.00677986	2.40244	0.663909	43.5583	1.04293	45.2686	1.60212	136.816	63.591	43.5583	1.04293
	EC1513_Spot 108	257.872	1195.53	2.10778	25.2595	4.86986	0.0370737	5.74155	0.00679187	3.04137	0.529712	43.6352	1.32263	36.9629	2.08409	377.677	126.496	43.6352	1.32263
	EC1513_Spot 116	2658.85	37250.4	2.27855	20.5873	1.01672	0.0814219	2.64451	0.0121574	2.44125	0.923139	77.899	1.89026	79.4809	2.02172	127.319	23.9157	77.899	1.89026
	EC1513_Spot 83	400.929	2421	3.61556	23.8448	2.94775	0.0749736	4.02524	0.0129659	2.74103	0.680963	83.0461	2.26172	73.4082	2.85058	230.246	74.3138	83.0461	2.26172
	EC1513_Spot 90	510.91	34501.9	1.60409	20.3553	1.63205	0.091199	2.97505	0.0134637	2.48744	0.836099	86.2138	2.13024	88.6196	2.52471	153.91	38.2339	86.2138	2.13024
	EC1513_Spot 14	2108.88	93388.5	2.0044	20.056	0.690985	0.205239	2.24267	0.0298541	2.13357	0.951351	189.635	3.98706	189.55	3.87779	188.463	16.1033	189.635	3.98706
	EC1513_Spot 52	468.515	32345.4	7.88254	19.2579	1.55473	0.239673	4.294	0.0334754	4.00266	0.932151	212.263	8.35781	218.153	8.42973	282.213	35.5515	212.263	8.35781
	EC1513_Spot 38	102.252	3533.29	1.56538	21.0276	1.80429	0.222622	3.8893	0.0339514	3.44547	0.885883	215.231	7.29329	204.09	7.19094	77.243	42.8589	215.231	7.29329
	EC1513_Spot 51	419.386	15030.6	3.21888	19.5124	1.4253	0.243467	3.00626	0.0344548	2.64691	0.880465	218.369	5.68323	221.255	5.97678	252.087	32.7775	218.369	5.68323
	EC1513_Spot 28	827.947	39066.7	10.7101	19.514	1.09442	0.251604	2.68403	0.0356093	2.45077	0.913092	225.56	5.43235	227.879	5.47863	251.898	25.1918	225.56	5.43235
	EC1513_Spot 47	926.041	18088.3	1.34436	19.7538	0.892597	0.251813	2.50585	0.0360767	2.34149	0.934408	228.469	5.25588	228.048	5.11832	223.712	20.6373	228.469	5.25588
	EC1513_Spot 33	171.653	1.54185e+06	2.1272	18.9532	1.69695	0.264242	3.42351	0.0363232	2.97335	0.868509	230.002	6.71821	238.08	7.26577	318.531	38.554	230.002	6.71821
	EC1513_Spot 101	749.823	38931.1	8.69519	19.4554	1.16413	0.258128	2.78538	0.0364228	2.53044	0.908472	230.621	5.73258	233.157	5.80268	258.781	26.7569	230.621	5.73258
	EC1513_Spot 9	207.128	6051.56	3.10121	20.3583	2.88326	0.248086	3.70922	0.0366304	2.33348	0.629103	231.913	5.31546	225.02	7.48648	153.585	67.5185	231.913	5.31546
	EC1513_Spot 3	848.784	95473.7	8.79788	19.4988	1.01835	0.261399	2.49621	0.0369668	2.27904	0.913001	234.004	5.23742	235.794	5.2525	253.669	23.4419	234.004	5.23742
	EC1513_Spot 35	2561.01	23558.3	27.908	18.8901	2.18586	0.275364	3.70623	0.0377259	2.99302	0.807565	238.721	7.0143	246.973	8.12538	326.153	49.6025	238.721	7.0143
	EC1513_Spot 34	742.146	20959.9	0.580149	18.9491	1.88592	0.275594	3.02901	0.0378753	2.37028	0.782526	239.65	5.57609	247.156	6.64499	319.027	42.846	239.65	5.57609
	EC1513_Spot 74	369.516	1374.94	2.90584	10.7172	10.931	0.493254	11.8036	0.0383397	4.45399	0.377342	242.534	10.6017	407.126	39.6096	1494.14	207.456	242.534	10.6017
	EC1513_Spot 84	464.722	12078.3	4.8936	20.0823	1.21047	0.27244	2.78491	0.0396811	2.50809	0.900598	250.856	6.17085	244.643	6.05453	185.414	28.2085	250.856	6.17085
	EC1513_Spot 117	257.249	7934.99	1.79482	19.8453	1.10324	0.277785	3.068	0.0399821	2.86278	0.933108	252.722	7.09488	248.899	6.7724	212.985	25.5785	252.722	7.09488
	EC1513_Spot 40	792.362	28227.9	1.46903	19.4489	1.08127	0.283976	2.99357	0.0400568	2.79148	0.93249	253.185	6.93061	253.807	6.72281	259.533	24.8248	253.185	6.93061
	EC1513_Spot 86	2897.07	297327	0.926631	19.4652	0.934278	0.285823	2.00488	0.040351	1.77388	0.884783	255.008	4.43524	255.266	4.52518	257.638	21.4828	255.008	4.43524
	EC1513_Spot 115	164.254	17410.8	1.18282	19.4493	1.62782	0.287858	3.46806	0.040605	3.06229	0.882999	256.582	7.70298	256.872	7.87109	259.496	37.396	256.582	7.70298
	EC1513_Spot 6	400.711	12437.7	1.32197	19.3265	1.35485	0.302616	3.12284	0.0424173	2.81363	0.900983	267.799	7.38051	268.441	7.36652	274.025	31.0307	267.799	7.38051
	EC1513_Spot 54	373.581	15137.9	2.7004	19.1839	1.20005	0.316049	2.89904	0.0439733	2.639	0.910301	277.415	7.16567	278.859	7.06925	290.97	27.4049	277.415	7.16567
	EC1513_Spot 80	511.01	41798.9	1.51539	19.1218	1.23293	0.329144	3.02928	0.0456472	2.76703	0.913426	287.742	7.78682	288.912	7.61714	298.366	28.1504	287.742	7.78682
	EC1513_Spot 12	338.058	6899.03	1.69304	19.1135	2.2147	0.377935	3.72353	0.0523909	2.99329	0.803885	329.184	9.60608	325.518	10.3702	299.362	50.5296	329.184	9.60608
	EC1513_Spot 62	464.974	184790	4.96779	18.0411	1.12153	0.428459	3.01286	0.0560623	2.79634	0.928134	351.634	9.56952	362.082	9.17619	429.544	25.0083	351.634	9.56952
	EC1513_Spot 106	1724.69	31309.6	16.4736	18.2966	0.82554	0.431369	2.26714	0.0572426	2.1115	0.931347	358.834	7.36975	364.148	6.93765	398.107	18.5037	358.834	7.36975
	EC1513_Spot 71	507.924	309293	9.81363	17.606	0.877526	0.454127	3.05634	0.0579877	2.92765	0.957896	363.376	10.3441	380.165	9.69213	483.754	19.3794	363.376	10.3441
	EC1513_Spot 49	215.624	27098	0.65358	17.1148	1.41222	0.668313	2.82919	0.0829567	2.45152	0.86651	513.747	12.1058	519.686	11.5083	545.859	30.8782	513.747	12.1058
	EC1513_Spot 102	300.024	22445.9	1.81511	17.2188	0.991078	0.724182	3.26442	0.0904374	3.11034	0.9528	558.124	16.6293	553.133	13.9228	532.66	21.7091	558.124	16.6293
	EC1513_Spot 50	284.678	21705.2	0.859566	17.077	0.950232	0.733995	3.16143	0.0909084	3.01525	0.95376	560.907	16.1979	558.896	13.5889	550.733	20.7243	560.907	16.1979
	EC1513_Spot 88	152.874	50979.2	0.79762	16.373	0.925476	0.768227	2.7183	0.0912253	2.55591	0.940259	562.779	13.7742	578.745	11.9922	641.945	19.8985	562.779	13.7742
	EC1513_Spot 82	160.814	13581.1	8.79651	17.1409	1.14373	0.733999	3.3558	0.0912487	3.15488	0.940128	562.918	17.0061	558.898	14.4245	542.56	25.0255	562.918	17.0061
	EC1513_Spot 42	497.527	94261.4	2.42909	16.5384	0.902913	0.769051	2.46041	0.092246	2.28874	0.93023	568.807	12.4607	579.219	10.861	620.248	19.5033	568.807	12.4607
	EC1513_Spot 41	355.578	598098	1.00516	16.4927	1.07967	0.776312	2.78674	0.0928594	2.5691	0.921899	572.426	14.0722	583.377	12.367	626.22	23.2829	572.426	14.0722
	EC1513_Spot 43	117.123	79484	0.806679	16.6416	1.35752	0.817734	3.37271	0.0986973	3.08744	0.91542	606.77	17.8791	606.783	15.4072	606.81	29.365	606.77	17.8791
	EC1513_Spot 120	661.637	73514.5	2.55196	16.4029	0.98429	0.869601	2.56708	0.103452	2.37088	0.923571	634.609	14.329	635.351	12.1244	638.013	21.1763	634.609	14.329
	EC1513_Spot 105	1768.36	436310	2.13337	15.6955	0.760991	0.974496	2.86038	0.110932	2.75729	0.963961	678.155	17.7488	690.778	14.3353	732.115	16.1013	678.155	17.7488
	EC1513_Spot 24	252.57	295321	3.01551	15.1536	1.27121	1.04443	3.31343	0.114786	3.05987	0.923476	700.486	20.3106	726.117	17.1892	806.073	26.6168	700.486	20.3106
	EC1513_Spot 30	268.082	54412	2.29102	14.6007	1.00062	1.37596	2.89268	0.145706	2.71411	0.938266	876.85	22.2512	878.716	17.0113	883.436	20.6712	876.85	22.2512
	EC1513_Spot 37	261.7	16229.4	5.41785	14.1656	0.914227	1.5704	2.77285	0.161341	2.6178	0.944084	964.224	23.4445	958.584	17.2031	945.664	18.7351	945.664	18.7351
	EC1513_Spot 8	346.836	35116.1	3.18345	13.7374	0.901801	1.67763	2.72666	0.167148	2.57322	0.943724	996.378	23.7559	1000.08	17.348	1008.2	18.2911	1008.2	18.2911
	EC1513_Spot 112	83.5724	243275	1.6489	13.6079	1.0607	1.70118	3.89923	0.167896	3.75219	0.96229	1000.51	34.7731	1008.98	24.9398	1027.39	21.4711	1027.39	21.4711
	EC1513_Spot 17	281.388	31442	3.24419	13.5256	0.743875	1.68349	3.29902	0.165145	3.21406	0.974247	985.307	29.3671	1002.3	21.0178	1039.64	15.0359	1039.64	15.0359
	EC1513_Spot 81	200.477	47340.5	2.72663	13.5246	1.1156	1.69246	3.80492	0.166013	3.6377	0.956051	990.105	33.3877	1005.69	24.29	1039.79	22.5388	1039.79	22.5388
	EC1513_Spot 65	88.0569	107655	1.44123	13.3652	1.12549	1.76738	4.03275	0.171319	3.87251	0.960266	1019.38	36.5129	1033.56	26.157	1063.71	22.6454	1063.71	22.6454
	EC1513_Spot 39	277.333	272892	2.98896	13.3366	0.970656	1.77829	3.56042	0.172007	3.42555	0.962121	1023.16	32.4092	1037.56	23.1436	1068.03	19.4929	1068.03	19.4929
	EC1513_Spot 89	2247.36	5262.29	6.63449	12.9765	4.17092	1.70344	6.56457	0.160319	5.06922	0.772209	958.549	45.1517	1009.83	42.0237	1122.82	83.2108	1122.82	83.2108
	EC1513_Spot 58	190.369	17367.5	3.13666	12.7328	0.981447	2.05046	3.28948	0.189353	3.13966	0.954454	1117.87	32.223	1132.45	22.455	1160.48	19.4758	1160.48	19.4758
	EC1513_Spot 77	257.477	43554.3	4.28087	12.7271	0.94473	2.09454	3.07723	0.193339	2.92862	0.951707	1139.44	30.5872	1147.02	21.1517	1161.36	18.7366	1161.36	18.7366
	EC1513_Spot 55	241.192	41136.2	3.68661	12.7023	1.0359	2.13957	3.34698	0.197109	3.18264	0.950899	1159.77	33.7818	1161.69	23.1641	1165.23	20.5439	1165.23	20.5439
	EC1513_Spot 91	175.273	21043.7	2.47104	12.485	1.10063	2.28221	3.66468	0.206654	3.4955	0.953834	1210.97	38.5917	1206.8	25.8791	1199.36	21.6981	1199.36	21.6981
	EC1513_Spot 48	84.8115	23675.5	2.32335	12.4503	1.01238	2.16327	4.33716	0.195339	4.21735	0.972376	1150.23	44.4286	1169.32	30.1257	1204.82	19.9252	1204.82	19.9252
	EC1513_Spot 93	190.787	37303.9	3.24798	12.3526	1.00883	2.35657	2.97505	0.211124	2.79878	0.940751	1234.8	31.4514	1229.55	21.2115	1220.32	19.8193	1220.32	19.8193
	EC1513_Spot 63	128.138	76073.8	2.81251	12.3328	0.961714	2.33937	3.13047	0.209247	2.97909	0.951642	1224.8	33.2315	1224.33	22.2712	1223.48	18.9062	1223.48	18.9062
	EC1513_Spot 94	77.5289	4963.03	2.17666	11.9836	1.30211	2.66286	4.02891	0.231438	3.81269	0.946333	1342.03	46.1932	1318.22	29.7488	1279.69	25.3799	1279.69	25.3799
	EC1513_Spot 56	174.348	15764	1.69594	11.8787	1.07848	2.49608	3.95417	0.215044	3.80425	0.962086	1255.64	43.404	1270.9	28.6733	1296.79	20.9683	1296.79	20.9683
	EC1513_Spot 46	667.796	207856	4.19396	11.7281	0.863333	2.1217	2.6988	0.180473	2.55699	0.947453	1069.56	25.2003	1155.89	18.627	1321.56	16.7264	1321.56	16.7264
	EC1513_Spot 44	86.8275	28187.1	2.36408	11.5734	1.10918	2.75509	3.92945	0.231259	3.76965	0.959334	1341.09	45.6431	1343.47	29.2818	1347.23	21.4148	1347.23	21.4148
	EC1513_Spot 67	63.5253	26033.4	1.2062	11.3751	0.971373	2.66307	4.36684	0.219704	4.25743	0.974946	1280.31	49.4377	1318.27	32.2464	1380.52	18.6671	1380.52	18.6671
	EC1513_Spot 104	324.074	40933.8	0.736618	10.6791	0.777989	2.77147	3.83632	0.214658	3.75661	0.979221	1253.58	42.797	1347.89	28.6325	1500.86	14.7085	1500.86	14.7085
	EC1513_Spot 29	288.561	128118	2.79781	10.6748	0.879804	3.20069	2.6352	0.2478	2.48399	0.94262	1427.12	31.8001	1457.33	20.3903	1501.63	16.6318	1501.63	16.6318
	EC1513_Spot 20	288.256	1.03724e+06	2.62097	10.4134	0.825522	3.4833	2.57897	0.263076	2.44327	0.947384	1505.56	32.8055	1523.44	20.3483	1548.35	15.5094	1548.35	15.5094
	EC1513_Spot 97	253.899	1.00094e+06	0.916782	10.4058	0.753056	3.56675	2.84954	0.269184	2.74824	0.964448	1536.66	37.5752	1542.17	22.6018	1549.71	14.1454	1549.71	14.1454
	EC1513_Spot 64	125.321	22959.2	1.08373	9.06697	0.916596	4.79424	3.24416	0.315269	3.11198	0.959256	1766.58	48.0872	1783.89	27.2621	1804.18	16.6674	1804.18	16.6674
	EC1513_Spot 92	117.134	271385	1.59981	9.05965	1.03023	4.88204	3.51409	0.320783	3.35968	0.95606	1793.55	52.6024	1799.16	29.6237	1805.65	18.7307	1805.65	18.7307
	EC1513_Spot 53	95.4723	10191.6	1.49369	8.92084	1.44651	4.62517	4.02165	0.299249	3.7525	0.933075	1687.58	55.7173	1753.82	33.588	1833.67	26.2088	1833.67	26.2088
	EC1513_Spot 68	215.539	96832.6	0.888212	8.86925	0.803604	5.05846	2.53154	0.32539	2.40061	0.948279	1816	37.9931	1829.17	21.4652	1844.18	14.5413	1844.18	14.5413
	EC1513_Spot 2	178.686	536869	1.09433	8.36226	0.862158	5.50681	3.0385	0.333981	2.91361	0.9589	1857.65	47.0252	1901.66	26.1166	1950.01	15.4049	1950.01	15.4049
	EC1513_Spot 87	162.41	73960.8	1.20908	8.35516	0.854396	5.8594	2.93242	0.355064	2.80519	0.956613	1958.74	47.3844	1955.24	25.4398	1951.53	15.2635	1951.53	15.2635
	EC1513_Spot 111	422.697	62583.9	2.69898	8.1901	0.735237	5.91362	2.48274	0.35127	2.37137	0.955145	1940.66	39.7395	1963.24	21.5662	1987.1	13.0798	1987.1	13.0798
	EC1513_Spot 59	275.204	140609	1.72826	7.89064	0.819866	6.56419	2.50966	0.375657	2.37197	0.945134	2055.97	41.7556	2054.55	22.1173	2053.12	14.4773	2053.12	14.4773
	EC1513_Spot 95	93.5977	144184	1.29176	7.80735	0.777883	6.65406	2.81756	0.376781	2.70805	0.961133	2061.23	47.7757	2066.54	24.8762	2071.83	13.7045	2071.83	13.7045
	EC1513_Spot 100	42.3394	16859.9	0.629582	7.71206	0.87108	6.89267	5.0079	0.385529	4.93156	0.984756	2102.06	88.4648	2097.71	44.4351	2093.44	15.3114	2093.44	15.3114
	EC1513_Spot 109	537.586	568633	1.8897	7.28576	0.751105	7.8292	2.58241	0.413705	2.47077	0.956767	2231.84	46.6112	2211.57	23.2556	2192.82	13.0552	2192.82	13.0552
	EC1513_Spot 7	173.293	107431	3.75078	6.32243	0.947723	10.251	2.8794	0.470056	2.71896	0.944281	2483.81	56.0464	2457.69	26.6444	2436.14	16.0557	2436.14	16.0557
	EC1513_Spot 25	183.058	110353	0.554207	5.74905	0.808389	11.6784	3.64589	0.486944	3.55514	0.975109	2557.44	75.0549	2578.97	34.1127	2595.93	13.4791	2595.93	13.4791
	EC1513_Spot 57	514.171	501950	2.61134	5.74676	0.721647	9.4364	2.90689	0.393304	2.81589	0.968695	2138.13	51.242	2381.38	26.6941	2596.59	12.0316	2596.59	12.0316
11	EC1535
	EC1535_Spot 64	307.272	1159.01	1.89602	29.2535	6.17543	0.0214324	7.21839	0.00454724	3.73753	0.517779	29.2469	1.09064	21.5322	1.53791	774.715	174.38	29.2469	1.09064
	EC1535_Spot 24	184.205	550.941	2.05759	45.3717	63.9801	0.0153776	64.0743	0.00506027	3.47419	0.0542213	32.5383	1.1276	15.4954	9.85348	2230.36	322.95	32.5383	1.1276
	EC1535_Spot 91	1093.4	2040.92	1.3499	23.736	1.67567	0.0297876	2.67809	0.00512793	2.08908	0.780066	32.9723	0.68706	29.8041	0.786579	218.732	42.1432	32.9723	0.68706
	EC1535_Spot 65	179.724	262.384	1.89258	-76.669	3.64665	-0.00927841	5.27322	0.00515931	3.80903	0.722336	33.1736	1.26035	9.46511	0.501449	0	0	33.1736	1.26035
	EC1535_Spot 115	205.243	1713.58	1.27796	25.012	4.3154	0.0287242	5.2854	0.00521068	3.05168	0.57738	33.503	1.01975	28.755	1.4985	352.171	111.505	33.503	1.01975
	EC1535_Spot 53	206.472	1109.67	1.45994	27.1509	8.88929	0.0267565	9.53757	0.0052688	3.45628	0.362385	33.8757	1.16777	26.811	2.52366	568.844	240.453	33.8757	1.16777
	EC1535_Spot 36	344.871	1371.47	1.13565	26.2257	3.69676	0.0277616	4.67196	0.00528046	2.85677	0.611472	33.9504	0.967337	27.8045	1.28139	476.118	97.9605	33.9504	0.967337
	EC1535_Spot 13	132.294	701.134	2.02374	36.8967	11.4463	0.0197503	12.0846	0.00528518	3.87559	0.320705	33.9808	1.31349	19.8586	2.37652	1482.65	379.892	33.9808	1.31349
	EC1535_Spot 42	232.702	2702.01	1.37258	22.3003	5.10483	0.0327781	5.83576	0.00530143	2.82787	0.484575	34.085	0.961333	32.7485	1.88064	64.1816	124.622	34.085	0.961333
	EC1535_Spot 75	155.179	2575.21	1.94191	21.1687	5.70098	0.0346421	6.75836	0.00531859	3.62964	0.537059	34.195	1.23787	34.5794	2.29766	61.3392	135.916	34.195	1.23787
	EC1535_Spot 62	322.878	3164.11	1.16664	21.5028	3.64595	0.0342759	4.40627	0.00534544	2.47431	0.561543	34.3671	0.848085	34.22	1.4827	23.8999	87.4957	34.3671	0.848085
	EC1535_Spot 116	320.642	895.585	2.18059	27.8927	19.4244	0.0264943	19.586	0.00535972	2.51056	0.128182	34.4587	0.862798	26.5516	5.13304	642.213	536.781	34.4587	0.862798
	EC1535_Spot 10	278.867	4059.71	1.53226	20.9347	3.54612	0.0353216	4.70078	0.00536297	3.08584	0.656451	34.4796	1.06114	35.2461	1.62842	87.7972	84.0853	34.4796	1.06114
	EC1535_Spot 83	282.808	1137.34	1.06018	27.4445	18.4641	0.0269489	18.6567	0.00536406	2.6739	0.143321	34.4866	0.919673	27.0012	4.97119	597.981	505.146	34.4866	0.919673
	EC1535_Spot 89	434.946	30457.2	1.08772	20.055	2.55435	0.0370018	3.5708	0.005382	2.49518	0.698772	34.6015	0.861057	36.8926	1.29372	188.587	59.469	34.6015	0.861057
	EC1535_Spot 52	2514.78	22340.3	0.897435	21.1498	1.37499	0.0352926	2.51977	0.00541364	2.11156	0.837994	34.8045	0.732935	35.2177	0.872193	63.5018	32.7622	34.8045	0.732935
	EC1535_Spot 113	246.966	1251.38	1.60931	27.4136	16.9522	0.0274815	17.1187	0.00546393	2.38175	0.139131	35.1269	0.83436	27.5277	4.64913	594.921	462.986	35.1269	0.83436
	EC1535_Spot 8	265.729	1636.47	2.13411	24.6419	3.61002	0.0305979	4.98847	0.00546845	3.44277	0.690145	35.1559	1.20704	30.6028	1.50384	313.814	92.5489	35.1559	1.20704
	EC1535_Spot 57	848.831	15542.9	1.47154	21.4336	1.78075	0.0353599	4.05255	0.00549673	3.64034	0.898284	35.3372	1.28287	35.2837	1.40533	31.6695	42.6473	35.3372	1.28287
	EC1535_Spot 18	207.605	652.819	1.42454	43.8031	32.6338	0.017385	32.8373	0.00552306	3.65056	0.111171	35.506	1.2926	17.5008	5.69761	2093.14	399.638	35.506	1.2926
	EC1535_Spot 22	169.163	7172.95	1.89537	19.8425	4.35217	0.0383966	5.33723	0.00552571	3.08943	0.578846	35.523	1.09444	38.2574	2.0039	213.36	100.872	35.523	1.09444
	EC1535_Spot 86	636.568	31019.8	0.92059	20.725	2.19404	0.0368847	3.31575	0.00554419	2.48604	0.749768	35.6415	0.883616	36.7779	1.19764	111.572	51.7812	35.6415	0.883616
	EC1535_Spot 106	332.423	1451.42	1.31745	24.054	8.05153	0.0318114	8.47643	0.00554968	2.65002	0.312635	35.6766	0.942828	31.7976	2.65354	252.31	204.108	35.6766	0.942828
	EC1535_Spot 84	291.726	56118.6	1.05133	19.1869	3.49796	0.0401089	4.68787	0.00558143	3.12096	0.665752	35.8802	1.11669	39.9304	1.83556	290.602	79.9237	35.8802	1.11669
	EC1535_Spot 90	509.814	1552.03	5.2103	24.4676	5.30995	0.0317139	5.98161	0.00562782	2.75392	0.460398	36.1775	0.993511	31.7017	1.86698	295.659	135.677	36.1775	0.993511
	EC1535_Spot 98	427.331	1467.79	1.67852	27.2553	7.21536	0.028489	7.83976	0.00563153	3.06601	0.391085	36.2014	1.10683	28.5229	2.20501	579.22	195.495	36.2014	1.10683
	EC1535_Spot 40	390.464	5017.04	1.56896	21.8691	2.77075	0.0357368	4.10777	0.00566821	3.03261	0.738262	36.4365	1.10186	35.6533	1.43914	16.7545	66.9891	36.4365	1.10186
	EC1535_Spot 48	883.276	40996.4	2.07518	20.7414	1.79879	0.0377135	2.69303	0.00567329	2.00419	0.744212	36.469	0.728843	37.5892	0.993782	109.72	42.454	36.469	0.728843
	EC1535_Spot 37	431.617	1558.51	1.63141	25.0207	6.84004	0.0313857	7.47796	0.00569547	3.02221	0.404149	36.6112	1.10333	31.3787	2.3106	353.067	176.87	36.6112	1.10333
	EC1535_Spot 29	554.543	4159.33	1.43757	19.5708	3.00018	0.0402251	3.76669	0.0057096	2.27747	0.604636	36.7018	0.833499	40.0438	1.47897	245.193	69.1302	36.7018	0.833499
	EC1535_Spot 118	396.217	3968.81	2.48618	21.6513	2.991	0.0365523	4.27729	0.00573981	3.05764	0.714854	36.8954	1.1249	36.4524	1.53152	7.38109	71.9857	36.8954	1.1249
	EC1535_Spot 11	323.476	2835.7	1.48704	21.1348	3.39564	0.037467	4.25522	0.0057431	2.56447	0.602665	36.9165	0.944007	37.348	1.56037	65.19	80.8681	36.9165	0.944007
	EC1535_Spot 32	438.477	2356.43	1.77847	21.8591	2.5912	0.0363608	3.33669	0.00576454	2.10219	0.630021	37.0539	0.776708	36.2648	1.18869	15.6475	62.6399	37.0539	0.776708
	EC1535_Spot 21	526.431	19402.3	1.12824	21.3278	2.5468	0.037309	3.76613	0.00577111	2.77445	0.736685	37.096	1.02626	37.1933	1.37541	43.4792	60.8749	37.096	1.02626
	EC1535_Spot 74	454.803	1263.08	1.29278	25.1621	2.1582	0.0317511	3.30236	0.00579434	2.49955	0.756898	37.2449	0.928272	31.7383	1.0319	367.652	55.9244	37.2449	0.928272
	EC1535_Spot 41	182.356	1027.22	1.8349	29.0145	4.97429	0.0275378	6.29288	0.00579486	3.85444	0.612509	37.2483	1.43157	27.5834	1.71242	751.626	139.729	37.2483	1.43157
	EC1535_Spot 117	188.994	5156.84	1.85318	22.0767	4.57047	0.0361944	5.677	0.00579528	3.36736	0.593159	37.251	1.25076	36.1018	2.01349	39.6494	111.031	37.251	1.25076
	EC1535_Spot 112	234.797	8319.8	1.97177	21.1886	3.55183	0.0381085	4.62588	0.00585629	2.96366	0.64067	37.642	1.11233	37.9756	1.72426	59.1381	84.6632	37.642	1.11233
	EC1535_Spot 17	690.946	2675.84	1.04753	23.494	2.10129	0.0343876	3.20833	0.00585946	2.42445	0.755674	37.6623	0.91044	34.3297	1.083	193.021	52.582	37.6623	0.91044
	EC1535_Spot 50	722.071	3211.42	0.860213	21.8724	5.47156	0.0369398	6.13676	0.0058599	2.77883	0.452817	37.6651	1.0436	36.8318	2.21978	17.1233	132.395	37.6651	1.0436
	EC1535_Spot 88	241.898	3195.08	1.69719	19.6395	2.91606	0.0413176	3.79798	0.00588524	2.43335	0.640697	37.8275	0.917782	41.1096	1.53015	237.113	67.2848	37.8275	0.917782
	EC1535_Spot 56	667.605	17938.4	2.16218	20.97	1.72897	0.0388502	3.17255	0.00590867	2.66002	0.838449	37.9777	1.00724	38.7009	1.2047	83.7602	41.0136	37.9777	1.00724
	EC1535_Spot 68	112.843	1513.89	1.55518	24.3896	4.48222	0.0335233	5.84981	0.00592995	3.75899	0.642583	38.114	1.42847	33.4809	1.92663	287.511	114.321	38.114	1.42847
	EC1535_Spot 119	1730.57	47755.9	1.47692	20.5798	1.44042	0.0398746	2.68596	0.00595164	2.26706	0.844041	38.253	0.864649	39.7016	1.04579	128.18	33.8825	38.253	0.864649
	EC1535_Spot 38	588.195	7338.67	1.78265	20.9172	1.81338	0.0393089	2.88504	0.0059634	2.24391	0.777773	38.3283	0.857501	39.1491	1.10797	89.7773	42.9977	38.3283	0.857501
	EC1535_Spot 5	245.74	1797.04	1.99831	27.3128	4.11263	0.0301438	8.60964	0.00597121	7.56387	0.878536	38.3785	2.89427	30.1552	2.55809	584.935	111.485	38.3785	2.89427
	EC1535_Spot 105	3694.65	7760.78	2.75646	18.2467	1.78589	0.0458682	2.97533	0.0060701	2.37974	0.799825	39.0121	0.925582	45.5372	1.32495	404.228	39.9886	39.0121	0.925582
	EC1535_Spot 30	1664.37	25123.7	1.81208	18.8712	2.02788	0.0466657	2.83841	0.00638698	1.98602	0.699695	41.0422	0.812517	46.3112	1.28498	328.418	45.9968	41.0422	0.812517
	EC1535_Spot 34	1026.81	20023.9	0.821941	20.5132	1.00294	0.114487	2.49011	0.017033	2.2792	0.915301	108.877	2.46069	110.062	2.59736	135.788	23.5593	108.877	2.46069
	EC1535_Spot 43	788.553	33026.7	1.16924	20.2597	1.37119	0.122596	2.81481	0.018014	2.45825	0.873327	115.092	2.80414	117.423	3.12129	164.896	32.0377	115.092	2.80414
	EC1535_Spot 111	308.7	7559.94	1.02519	20.9303	1.91265	0.122325	3.51755	0.0185691	2.95211	0.839251	118.606	3.46937	117.178	3.89287	88.2929	45.3378	118.606	3.46937
	EC1535_Spot 93	965.098	17931.5	1.02257	20.3629	1.07978	0.125965	2.54081	0.0186032	2.29995	0.905205	118.822	2.70782	120.465	2.88621	153.036	25.2703	118.822	2.70782
	EC1535_Spot 61	816.266	79081.5	5.03498	20.6404	1.61121	0.133971	6.44615	0.0200551	6.24154	0.968259	128.004	7.91064	127.659	7.73296	121.253	37.976	128.004	7.91064
	EC1535_Spot 23	459.825	12620.4	1.38532	20.3128	1.6526	0.144615	4.49096	0.0213049	4.17584	0.929832	135.898	5.61547	137.146	5.76138	158.781	38.6523	135.898	5.61547
	EC1535_Spot 49	256.93	104282	1.31276	20.5196	1.31163	0.144835	3.07051	0.0215546	2.77627	0.904171	137.474	3.77623	137.341	3.94433	135.056	30.8055	137.474	3.77623
	EC1535_Spot 47	372.661	28861	2.82123	19.995	1.59643	0.170815	2.80898	0.0247712	2.31123	0.8228	157.739	3.60147	160.126	4.1612	195.598	37.1052	157.739	3.60147
	EC1535_Spot 103	135.887	1907.84	1.71086	23.1809	2.51206	0.155937	3.536	0.0262166	2.48855	0.703775	166.826	4.09829	147.14	4.84351	159.558	62.4519	166.826	4.09829
	EC1535_Spot 94	169.712	7672.51	2.67094	20.6025	2.0791	0.198547	3.96503	0.0296676	3.37621	0.851498	188.467	6.27095	183.896	6.66946	125.539	48.9529	188.467	6.27095
	EC1535_Spot 60	180.65	11181.2	2.1497	18.3318	1.35248	0.427293	3.54014	0.0568107	3.2716	0.924145	356.2	11.3374	361.253	10.7616	393.801	30.3381	356.2	11.3374
	EC1535_Spot 26	511.769	259172	3.15086	17.3565	0.984499	0.621654	2.86312	0.0782546	2.68854	0.939023	485.696	12.5784	490.883	11.1449	515.14	21.616	485.696	12.5784
	EC1535_Spot 20	249.926	15139	2.12176	17.4766	1.20341	0.627551	2.79076	0.0795433	2.51796	0.90225	493.396	11.96	494.569	10.9265	500.025	26.5119	493.396	11.96
	EC1535_Spot 96	382.888	21326.5	0.588628	17.2672	0.862333	0.66919	2.70722	0.0838053	2.56621	0.947912	518.796	12.7918	520.22	11.0208	526.497	18.9037	518.796	12.7918
	EC1535_Spot 79	161.88	12042.7	1.79019	16.9144	1.27975	0.723741	3.8625	0.0887847	3.64433	0.943516	548.346	19.1573	552.873	16.4683	571.545	27.8334	548.346	19.1573
	EC1535_Spot 67	515.619	30975.4	2.66472	16.7164	0.832635	0.753063	2.58934	0.0913003	2.45182	0.946888	563.223	13.2232	570	11.2946	597.148	18.0201	563.223	13.2232
	EC1535_Spot 54	425.597	27806.8	4.67952	16.6335	0.969135	0.76128	2.28049	0.0918389	2.06432	0.905208	566.403	11.1934	574.748	10.0089	607.862	20.9526	566.403	11.1934
	EC1535_Spot 104	306.066	41359.3	0.863221	16.8934	0.996958	0.760603	2.7116	0.0931908	2.52167	0.929959	574.38	13.8575	574.358	11.8952	574.274	21.6759	574.38	13.8575
	EC1535_Spot 114	315.191	43426	0.940016	16.4536	0.896302	0.803719	2.29826	0.0959098	2.11628	0.920818	590.394	11.9393	598.924	10.3987	631.376	19.3078	590.394	11.9393
	EC1535_Spot 27	122.855	20065	1.22059	15.6381	1.26087	0.946187	3.33038	0.107315	3.08247	0.925562	657.136	19.2578	676.115	16.442	739.832	26.6575	657.136	19.2578
	EC1535_Spot 80	493.402	136476	1.56673	15.119	0.810017	1.16135	2.5862	0.127346	2.45608	0.949685	772.708	17.885	782.59	14.111	810.89	16.963	772.708	17.885
	EC1535_Spot 101	138.616	9953.4	2.48782	14.1746	1.18384	1.51526	3.53284	0.155776	3.32858	0.942184	933.258	28.9205	936.567	21.6134	944.361	24.23	944.361	24.23
	EC1535_Spot 95	175.279	83018.2	5.04528	14.1176	0.972642	1.4817	2.63585	0.151712	2.44983	0.929428	910.554	20.8033	922.928	15.9808	952.606	19.8828	952.606	19.8828
	EC1535_Spot 97	134.743	11709	2.73219	13.941	0.8933	1.59964	3.57367	0.16174	3.46022	0.968254	966.438	31.0551	970.07	22.3318	978.312	18.1887	978.312	18.1887
	EC1535_Spot 6	85.5863	29679.1	1.9359	13.7902	1.20707	1.74503	4.31007	0.174531	4.13759	0.959983	1037.03	39.635	1025.32	27.8277	1000.41	24.4936	1000.41	24.4936
	EC1535_Spot 110	248.916	566229	1.73733	13.745	0.720812	1.62245	2.54711	0.161739	2.44299	0.959122	966.435	21.9254	978.94	16.0021	1007.08	14.6037	1007.08	14.6037
	EC1535_Spot 120	14.9049	10524.1	2.31887	13.7414	1.61245	1.65347	7.85274	0.164789	7.68541	0.978691	983.337	70.0945	990.882	49.7257	1007.61	32.7011	1007.61	32.7011
	EC1535_Spot 7	131.842	1.33402e+06	1.52471	13.6689	0.865049	1.6465	3.65707	0.163227	3.55329	0.971621	974.686	32.1425	988.208	23.1062	1018.34	17.5186	1018.34	17.5186
	EC1535_Spot 1	138.007	19362.3	1.03377	13.6614	0.973955	1.6178	2.99247	0.160295	2.82954	0.945553	958.414	25.1992	977.136	18.7801	1019.44	19.722	1019.44	19.722
	EC1535_Spot 45	246.673	21565.1	1.56543	13.5161	0.922123	1.51338	3.59527	0.148354	3.47501	0.966549	891.731	28.9402	935.808	21.9847	1041.06	18.6306	1041.06	18.6306
	EC1535_Spot 102	43.0794	27061.2	2.86245	12.8102	1.41137	2.03601	3.79581	0.189163	3.52366	0.928304	1116.84	36.1336	1127.63	25.8526	1148.45	28.0348	1148.45	28.0348
	EC1535_Spot 35	577.47	4.17493e+06	12.4032	12.5849	0.752761	2.13853	2.13876	0.195192	2.00191	0.936014	1149.44	21.076	1161.35	14.7983	1183.65	14.8743	1183.65	14.8743
	EC1535_Spot 51	92.1743	7701.23	3.50903	12.5803	1.08505	2.12839	2.9493	0.194197	2.74245	0.929865	1144.07	28.7492	1158.06	20.3769	1184.36	21.4402	1184.36	21.4402
	EC1535_Spot 99	243.629	92640.6	2.23546	12.5449	0.654645	2.18586	2.53209	0.198878	2.446	0.966001	1169.29	26.1571	1176.55	17.642	1189.94	12.9091	1189.94	12.9091
	EC1535_Spot 76	318.224	565346	2.31834	12.3554	0.958138	2.30176	2.42391	0.206259	2.2265	0.918558	1208.86	24.5424	1212.83	17.1594	1219.91	18.8402	1219.91	18.8402
	EC1535_Spot 31	177.052	118385	3.26791	12.2364	1.14105	2.24317	3.24643	0.199073	3.03929	0.936196	1170.34	32.5282	1194.65	22.8035	1238.89	22.3752	1238.89	22.3752
	EC1535_Spot 14	173.694	74820.8	1.45199	12.2331	0.945294	2.30775	3.82606	0.20475	3.70745	0.968998	1200.79	40.6187	1214.67	27.1107	1239.43	18.5332	1239.43	18.5332
	EC1535_Spot 87	164.816	41452.4	4.61149	11.1529	0.885119	2.95362	3.09268	0.238913	2.96331	0.95817	1381.04	36.8383	1395.78	23.464	1418.34	16.9208	1418.34	16.9208
	EC1535_Spot 59	130.395	69838.2	2.71044	10.8734	0.7968	3.24487	3.53479	0.255894	3.44382	0.974263	1468.8	45.2348	1467.95	27.4431	1466.7	15.1332	1466.7	15.1332
	EC1535_Spot 9	165.352	67738.4	3.27071	10.5636	0.997266	3.30421	3.1214	0.25315	2.9578	0.947588	1454.7	38.5183	1482.05	24.3353	1521.39	18.8014	1521.39	18.8014
	EC1535_Spot 44	716.129	892224	3.25162	10.4392	0.692589	3.41744	2.12262	0.258742	2.00645	0.94527	1483.4	26.5876	1508.41	16.6752	1543.7	13.0198	1543.7	13.0198
	EC1535_Spot 109	541.895	117169	2.81215	10.4091	0.840868	3.34604	2.69759	0.252607	2.56319	0.950177	1451.91	33.3222	1491.87	21.0914	1549.11	15.7961	1549.11	15.7961
	EC1535_Spot 92	263.378	868758	1.89937	10.369	0.805399	3.59739	3.01871	0.270534	2.90928	0.963751	1543.51	39.9342	1548.96	23.9888	1556.37	15.1153	1556.37	15.1153
	EC1535_Spot 39	144.315	7.8005e+06	1.03591	10.3679	0.944695	3.49478	3.13677	0.262792	2.99113	0.953571	1504.11	40.1272	1526.04	24.7691	1556.56	17.7276	1556.56	17.7276
	EC1535_Spot 46	84.1968	15329.4	2.91391	10.2894	1.01113	3.5412	3.79491	0.264264	3.65773	0.963851	1511.62	49.2877	1536.47	30.0565	1570.82	18.939	1570.82	18.939
	EC1535_Spot 28	824.388	91818.1	3.38386	10.253	0.880251	3.63253	2.47079	0.270122	2.30867	0.934386	1541.42	31.6518	1556.69	19.6748	1577.45	16.4731	1577.45	16.4731
	EC1535_Spot 25	421.566	63747.8	3.62537	10.1677	0.748549	3.03391	2.35935	0.223729	2.23746	0.948336	1301.55	26.3701	1416.19	18.0196	1593.07	13.9812	1593.07	13.9812
	EC1535_Spot 73	883.617	13263.2	3.32898	9.87077	1.04122	3.58776	2.30703	0.256847	2.05871	0.89236	1473.69	27.1211	1546.83	18.3212	1648.22	19.3081	1648.22	19.3081
	EC1535_Spot 69	359.932	69724.8	2.65703	9.58289	0.765886	4.20298	2.48401	0.292114	2.36299	0.95128	1652.09	34.4378	1674.6	20.3773	1702.92	14.1033	1702.92	14.1033
	EC1535_Spot 78	278.532	15449.1	0.885771	9.37133	0.931202	3.88285	2.84092	0.263907	2.68397	0.944754	1509.8	36.1273	1610.12	22.9425	1743.92	17.0599	1743.92	17.0599
	EC1535_Spot 100	221.054	739094	0.965263	9.12904	0.556409	4.72126	2.48682	0.312595	2.42377	0.974648	1753.46	37.2105	1771.02	20.8402	1791.77	10.1343	1791.77	10.1343
	EC1535_Spot 70	233.98	30839.3	2.23112	8.75376	0.852268	4.26726	3.58678	0.270921	3.48405	0.97136	1545.47	47.8778	1687.07	29.5135	1867.86	15.378	1867.86	15.378
	EC1535_Spot 16	193.195	189095	1.67139	5.4543	0.707882	12.2066	2.75559	0.482871	2.66311	0.966441	2539.76	55.9045	2620.41	25.8668	2683.32	11.7046	2683.32	11.7046
12	EC1572
	EC1572_Spot 5	612.319	7193.55	1.45332	21.7853	2.813	0.0269791	3.39187	0.00426275	1.89521	0.55875	27.421	0.518582	27.0311	0.904764	7.47653	67.9111	27.421	0.518582
	EC1572_Spot 97	659.323	4662.7	1.09038	22.0896	3.94506	0.0508778	4.39594	0.00815105	1.93928	0.441153	52.3321	1.01076	50.3892	2.16102	41.0652	95.8543	52.3321	1.01076
	EC1572_Spot 110	669.527	2589.68	1.48956	23.4464	1.98096	0.0498024	2.64313	0.00846886	1.74984	0.662031	54.3639	0.947278	49.3496	1.27318	187.948	49.521	54.3639	0.947278
	EC1572_Spot 70	457.948	8265.45	2.64895	21.0055	2.0679	0.0636635	3.84152	0.0096989	3.23745	0.842752	62.2219	2.00471	62.6685	2.33464	79.7367	49.1144	62.2219	2.00471
	EC1572_Spot 47	890.5	14169	1.63768	20.6249	1.36008	0.0691493	1.75838	0.0103437	1.11449	0.633815	66.3375	0.735533	67.8919	1.15476	122.988	32.0443	66.3375	0.735533
	EC1572_Spot 67	420.813	904.466	2.4496	8.33314	1.48587	0.175904	2.74116	0.0106312	2.3035	0.84034	68.1716	1.56206	164.53	4.16362	1956.25	26.5324	68.1716	1.56206
	EC1572_Spot 87	944.876	21189.1	0.788077	20.2758	0.983226	0.139369	1.7726	0.0204947	1.47492	0.832064	130.782	1.90949	132.482	2.20162	163.048	22.9745	130.782	1.90949
	EC1572_Spot 26	473.351	14230.1	0.973958	19.7152	1.37358	0.191407	2.17755	0.0273689	1.68967	0.775953	174.06	2.90169	177.829	3.55219	228.225	31.7357	174.06	2.90169
	EC1572_Spot 99	172.257	8626.91	2.15067	19.8863	1.64007	0.191095	3.35132	0.0275614	2.92258	0.87207	175.268	5.05334	177.563	5.4595	208.254	38.0401	175.268	5.05334
	EC1572_Spot 24	311.647	18526.1	1.86683	18.5097	1.29588	0.211215	2.39536	0.0283546	2.01456	0.841026	180.242	3.58079	194.572	4.24137	372.095	29.1631	180.242	3.58079
	EC1572_Spot 85	616.903	13043.7	1.05769	19.6861	1.07695	0.199914	2.15527	0.028543	1.86691	0.866209	181.423	3.3398	185.053	3.64608	231.622	24.8479	181.423	3.3398
	EC1572_Spot 36	382.302	6269.6	1.66996	20.3081	1.34441	0.194438	2.2631	0.0286384	1.82049	0.804424	182.021	3.26733	180.409	3.7407	159.342	31.4552	182.021	3.26733
	EC1572_Spot 34	177.305	7249.05	1.5915	21.1986	2.57292	0.186676	3.41825	0.0287008	2.25045	0.658364	182.412	4.04755	173.789	5.46001	57.9674	61.3367	182.412	4.04755
	EC1572_Spot 96	1513.13	3708	1.21896	15.3964	1.23299	0.260279	1.83697	0.0290641	1.36169	0.741269	184.688	2.47919	234.892	3.85218	772.706	25.9484	184.688	2.47919
	EC1572_Spot 9	202.65	13409.4	1.12469	19.2934	1.36107	0.208258	2.74795	0.0291413	2.3872	0.868719	185.172	4.35753	192.09	4.80933	277.997	31.1597	185.172	4.35753
	EC1572_Spot 25	984.634	81861.9	0.689274	19.6398	0.97416	0.204652	1.72018	0.0291509	1.41776	0.82419	185.232	2.58876	189.055	2.96729	237.094	22.4542	185.232	2.58876
	EC1572_Spot 59	228.573	10095.1	1.36327	16.5101	2.20736	0.24515	2.9129	0.0293548	1.90067	0.652501	186.509	3.49413	222.629	5.82332	623.947	47.625	186.509	3.49413
	EC1572_Spot 69	227.117	99179.9	1.35368	20.337	1.77392	0.199985	3.14547	0.0294974	2.59754	0.825802	187.402	4.79777	185.114	5.32283	156.014	41.5438	187.402	4.79777
	EC1572_Spot 84	256.164	30555.2	1.5333	20.1465	1.22976	0.202203	2.79371	0.0295453	2.50849	0.897905	187.702	4.64058	186.989	4.77117	177.975	28.6733	187.702	4.64058
	EC1572_Spot 3	241.681	6565.44	1.36595	20.2025	1.65635	0.202081	2.56476	0.0296094	1.95818	0.763496	188.103	3.63018	186.886	4.37795	171.504	38.6677	188.103	3.63018
	EC1572_Spot 66	227.155	34746.3	2.22638	20.2235	1.29469	0.202876	2.27096	0.0297569	1.86575	0.821569	189.026	3.47555	187.557	3.88912	169.075	30.2506	189.026	3.47555
	EC1572_Spot 21	261.607	7753.11	1.49094	20.8143	1.73463	0.197231	3.28573	0.029774	2.79054	0.849289	189.134	5.20117	182.781	5.49623	101.408	41.0464	189.134	5.20117
	EC1572_Spot 82	287.462	6348.84	2.3572	19.8095	1.45455	0.208073	2.82952	0.0298942	2.42703	0.857753	189.886	4.54138	191.934	4.94844	217.217	33.6745	189.886	4.54138
	EC1572_Spot 77	196.214	9025.49	1.4208	19.9527	1.7498	0.210048	3.27355	0.0303961	2.76665	0.845151	193.027	5.26121	193.593	5.76992	200.521	40.6181	193.027	5.26121
	EC1572_Spot 17	191.249	7686.94	0.98048	19.8863	1.91085	0.212027	3.55143	0.0305804	2.99354	0.842912	194.18	5.72617	195.252	6.30836	208.252	44.3338	194.18	5.72617
	EC1572_Spot 51	984.409	67743.4	1.46904	19.918	0.982298	0.213585	2.25249	0.0308544	2.02702	0.899901	195.893	3.91107	196.557	4.02528	204.551	22.8155	195.893	3.91107
	EC1572_Spot 6	299.789	2717.48	0.896957	21.4674	2.03908	0.198718	2.93249	0.0309397	2.10753	0.718682	196.427	4.07732	184.041	4.93617	27.883	48.8725	196.427	4.07732
	EC1572_Spot 65	428.56	37269.6	1.26249	20.3661	1.02287	0.211072	2.31299	0.0311772	2.07452	0.896901	197.912	4.04334	194.452	4.09323	152.682	23.9392	197.912	4.04334
	EC1572_Spot 68	239.656	302865	1.92387	19.9752	1.33264	0.223157	2.73277	0.0323296	2.38581	0.873039	205.112	4.81657	204.534	5.0625	197.878	30.9607	205.112	4.81657
	EC1572_Spot 83	282.852	24392.8	1.01477	19.2417	1.13416	0.237057	2.51749	0.0330823	2.24754	0.892771	209.811	4.63967	216.008	4.89851	284.106	25.9438	209.811	4.63967
	EC1572_Spot 81	201.537	15278.7	1.96565	19.4276	1.33412	0.236135	3.02519	0.0332719	2.71512	0.897505	210.994	5.636	215.251	5.86789	262.087	30.6548	210.994	5.636
	EC1572_Spot 91	343.546	5860.7	1.64475	20.5511	1.46608	0.226685	2.6298	0.0337876	2.18323	0.830187	214.21	4.59985	207.459	4.93454	131.443	34.4797	214.21	4.59985
	EC1572_Spot 46	391.104	11698.3	2.2937	19.9146	1.15378	0.235962	2.23581	0.034081	1.91511	0.856561	216.04	4.06883	215.109	4.33416	204.954	26.7707	216.04	4.06883
	EC1572_Spot 92	220.498	11450.9	1.25927	18.2648	2.62744	0.258116	3.99464	0.0341923	3.00894	0.753243	216.733	6.41296	233.147	8.32169	402.012	58.8482	216.733	6.41296
	EC1572_Spot 62	98.4005	6322.72	2.58457	20.5215	2.42774	0.234969	3.84952	0.0349718	2.98745	0.776058	221.59	6.50742	214.292	7.43702	134.845	57.0875	221.59	6.50742
	EC1572_Spot 61	161.238	4451.33	2.50184	20.4736	1.71745	0.236137	2.96044	0.0350636	2.41134	0.814522	222.162	5.26583	215.252	5.74233	140.32	40.3195	222.162	5.26583
	EC1572_Spot 10	231.777	82378.4	1.53349	19.3323	1.00198	0.252003	2.45406	0.0353336	2.2402	0.912851	223.843	4.92846	228.202	5.01556	273.333	22.9645	223.843	4.92846
	EC1572_Spot 27	121.668	20848.1	1.65329	19.5711	1.74968	0.249195	2.93081	0.0353715	2.35123	0.802246	224.079	5.17811	225.922	5.93652	245.171	40.3	224.079	5.17811
	EC1572_Spot 43	450.342	21726.5	2.71338	19.1409	0.898952	0.25602	2.34048	0.0355414	2.16095	0.923296	225.137	4.78113	231.454	4.84411	296.086	20.5165	225.137	4.78113
	EC1572_Spot 13	427.499	7508.42	3.91521	19.5911	1.443	0.251117	2.34854	0.0356807	1.85294	0.788976	226.004	4.11516	227.483	4.78639	242.774	33.2331	226.004	4.11516
	EC1572_Spot 53	609.227	119792	2.74564	19.5851	0.792872	0.251766	1.80698	0.035762	1.62374	0.898593	226.51	3.61406	228.01	3.69028	243.527	18.2769	226.51	3.61406
	EC1572_Spot 14	394.075	387644	5.61129	19.2448	0.999793	0.256345	1.88384	0.0357797	1.59664	0.847546	226.62	3.55545	231.717	3.90294	283.767	22.8728	226.62	3.55545
	EC1572_Spot 75	551.903	21324.6	9.1006	19.7143	1.09477	0.251857	1.98012	0.036011	1.64995	0.83326	228.059	3.69709	228.083	4.04504	228.334	25.2885	228.059	3.69709
	EC1572_Spot 1	544.692	105460	18.3881	19.0486	0.901538	0.260679	2.10312	0.0360138	1.90009	0.903462	228.077	4.2579	235.214	4.41569	307.127	20.5324	228.077	4.2579
	EC1572_Spot 105	358.628	11079.2	6.1753	19.4513	1.04807	0.258256	2.19221	0.0364333	1.92545	0.878311	230.687	4.36322	233.261	4.56875	259.254	24.0784	230.687	4.36322
	EC1572_Spot 111	412.19	60110.4	1.88184	19.7057	1.15214	0.256607	1.97077	0.0366739	1.5989	0.81131	232.183	3.64632	231.929	4.08635	229.326	26.6014	232.183	3.64632
	EC1572_Spot 71	553.24	14436.5	10.7889	19.8115	1.15738	0.26413	2.65482	0.0379519	2.38926	0.899969	240.125	5.63166	237.99	5.63242	216.979	26.7802	240.125	5.63166
	EC1572_Spot 23	732.557	53675.7	1.44783	19.1832	0.780003	0.274953	1.89378	0.0382541	1.72569	0.91124	242.002	4.09879	246.646	4.14693	291.049	17.8391	242.002	4.09879
	EC1572_Spot 90	741.575	11702.1	2.11461	19.9136	0.748667	0.267218	2.01524	0.0385934	1.87101	0.928432	244.109	4.48191	240.467	4.31492	205.039	17.3747	244.109	4.48191
	EC1572_Spot 78	1126.38	45221	13.9508	19.5508	0.815537	0.272662	2.38547	0.0386624	2.24173	0.939745	244.537	5.37918	244.82	5.18942	247.529	18.7537	244.537	5.37918
	EC1572_Spot 40	326.436	6345.13	1.99256	20.2827	1.07456	0.264063	2.80071	0.0388447	2.58636	0.923468	245.668	6.23431	237.936	5.94075	162.281	25.1052	245.668	6.23431
	EC1572_Spot 74	352.578	8251.7	1.26037	19.768	1.09118	0.2735	2.58577	0.039212	2.34425	0.906599	247.946	5.70213	245.488	5.63874	222.073	25.2335	247.946	5.70213
	EC1572_Spot 109	535.412	5.41398e+06	1.16638	18.8379	0.899295	0.292042	2.51539	0.0399004	2.34914	0.933907	252.216	5.81049	260.166	5.7731	332.399	20.4141	252.216	5.81049
	EC1572_Spot 8	2399.94	55657.2	4.48815	19.418	0.615989	0.284981	1.53688	0.0401345	1.40803	0.916163	253.667	3.50235	254.601	3.46091	263.218	14.1424	253.667	3.50235
	EC1572_Spot 119	480.746	16759.2	1.14649	19.2907	0.931062	0.287382	2.53351	0.0402073	2.35622	0.930024	254.118	5.8711	256.496	5.74259	278.317	21.3115	254.118	5.8711
	EC1572_Spot 88	532.5	27549.3	9.48686	18.1327	1.12632	0.367605	2.54217	0.048344	2.27905	0.896495	304.347	6.77502	317.877	6.93845	418.244	25.157	304.347	6.77502
	EC1572_Spot 31	1095.69	84486.6	19.9885	16.6478	1.77754	0.435853	3.99352	0.0526253	3.57611	0.895478	330.62	11.5253	367.324	12.3094	606.006	38.4489	330.62	11.5253
	EC1572_Spot 28	163.905	11952.1	2.13212	18.5093	1.4625	0.397929	3.1822	0.053419	2.82621	0.888132	335.478	9.23883	340.145	9.19792	372.145	32.9098	335.478	9.23883
	EC1572_Spot 73	1039.37	20720.2	2.53102	17.8008	1.04909	0.445804	1.86901	0.057555	1.5468	0.827607	360.739	5.42668	374.337	5.85169	459.377	23.2858	360.739	5.42668
	EC1572_Spot 108	678.722	44371.4	2.83576	17.7754	0.796123	0.500438	2.06949	0.0645162	1.91023	0.923044	403.032	7.46312	411.999	7.00861	462.566	17.6448	403.032	7.46312
	EC1572_Spot 48	312.276	67537.3	1.66425	17.3329	0.921609	0.6028	2.02168	0.0757779	1.79939	0.890049	470.872	8.17079	479.009	7.72046	518.133	20.2419	470.872	8.17079
	EC1572_Spot 106	687.462	66680.8	15.9504	17.7584	0.666116	0.591205	2.41237	0.0761449	2.31858	0.961122	473.071	10.5757	471.637	9.10116	464.645	14.7584	473.071	10.5757
	EC1572_Spot 112	305.47	28031.3	1.23166	17.4777	0.914947	0.621868	2.58867	0.0788282	2.42159	0.935456	489.125	11.4064	491.017	10.0787	499.878	20.1491	489.125	11.4064
	EC1572_Spot 103	798.478	41849.7	1.21763	17.321	0.556752	0.654126	1.95992	0.0821738	1.87918	0.958804	509.085	9.19864	511.014	7.86991	519.633	12.2408	509.085	9.19864
	EC1572_Spot 35	212.543	25902.1	1.85142	17.1909	0.92306	0.673212	2.73793	0.0839361	2.57764	0.941455	519.574	12.8673	522.663	11.1859	536.204	20.2128	519.574	12.8673
	EC1572_Spot 72	364.045	71371.7	1.78204	16.8598	0.798645	0.69774	2.24856	0.0853189	2.10194	0.934797	527.793	10.6519	537.44	9.38357	578.569	17.3494	527.793	10.6519
	EC1572_Spot 114	1731.07	130876	6.85032	16.4582	0.751206	0.715942	1.81848	0.0854592	1.65607	0.910688	528.626	8.40507	548.268	7.7041	630.769	16.2017	528.626	8.40507
	EC1572_Spot 107	463.385	53284.7	14.6322	16.6915	0.794013	0.723779	2.13076	0.0876195	1.97729	0.927974	541.443	10.2686	552.895	9.08448	600.328	17.19	541.443	10.2686
	EC1572_Spot 39	154.716	32603.3	0.534196	16.7057	1.29708	0.724755	3.54521	0.0878119	3.2994	0.930666	542.584	17.1694	553.47	15.1275	598.496	28.0862	542.584	17.1694
	EC1572_Spot 120	417.452	450078	1.30529	16.912	0.746206	0.726901	2.02636	0.0891599	1.88396	0.929727	550.567	9.94188	554.733	8.66094	571.881	16.2118	550.567	9.94188
	EC1572_Spot 89	250.599	21090.4	1.46319	17.1627	0.872966	0.721087	2.67314	0.0897579	2.52658	0.945173	554.105	13.4151	551.308	11.3725	539.792	19.0944	554.105	13.4151
	EC1572_Spot 76	1645.72	441349	32.1211	16.5863	0.54227	0.76943	1.56212	0.092559	1.46498	0.937814	570.653	8.00061	579.436	6.89742	613.998	11.7135	570.653	8.00061
	EC1572_Spot 41	201.167	22921.2	2.05833	16.8375	0.933138	0.764712	2.59367	0.0933841	2.41999	0.933039	575.52	13.3239	576.725	11.4126	581.471	20.2471	575.52	13.3239
	EC1572_Spot 49	280.875	65051.6	0.826615	16.6794	0.933422	0.796813	2.03472	0.0963909	1.80799	0.888567	593.223	10.2467	595.029	9.1622	601.899	20.1923	593.223	10.2467
	EC1572_Spot 79	325.041	33450.4	4.09429	16.2862	0.809811	0.845198	2.14905	0.0998334	1.99064	0.926285	613.433	11.6482	622.01	9.99554	653.324	17.3776	613.433	11.6482
	EC1572_Spot 15	733.224	254577	3.54424	16.4403	0.58572	0.848265	1.69758	0.101144	1.59334	0.938591	621.111	9.43458	623.696	7.9111	633.108	12.6317	621.111	9.43458
	EC1572_Spot 118	154.296	127237	2.74787	16.2506	1.07268	0.87335	3.21581	0.102933	3.03163	0.942727	631.576	18.2391	637.385	15.2238	658.025	22.9814	631.576	18.2391
	EC1572_Spot 58	205.465	117309	3.32941	16.3666	0.837633	0.871917	2.4015	0.103498	2.25069	0.937199	634.875	13.608	636.608	11.3585	642.784	18.0083	634.875	13.608
	EC1572_Spot 11	116.394	26762.2	0.738037	15.759	1.17992	0.908698	3.18846	0.10386	2.96211	0.929008	636.989	17.9661	656.365	15.4144	723.52	25.0227	636.989	17.9661
	EC1572_Spot 102	380.817	177561	2.77633	16.4489	0.746772	0.878073	2.15109	0.104753	2.0173	0.937806	642.204	12.3308	639.942	10.2122	631.984	16.1027	642.204	12.3308
	EC1572_Spot 19	702.643	334545	3.46704	15.8959	0.700121	0.913693	1.9436	0.105338	1.81312	0.932868	645.614	11.1387	659.019	9.42274	705.153	14.8961	645.614	11.1387
	EC1572_Spot 30	1450.43	8.01697e+06	4.92907	15.7823	0.688607	0.942381	1.89225	0.107869	1.76251	0.931435	660.358	11.0626	674.127	9.32208	720.387	14.6353	660.358	11.0626
	EC1572_Spot 113	932.051	105217	2.50544	15.4824	0.567054	1.02416	1.52912	0.115002	1.42009	0.928698	701.73	9.44201	716	7.85603	760.966	11.9558	701.73	9.44201
	EC1572_Spot 37	180.207	31456.5	1.6753	14.6586	0.837479	1.15133	2.64389	0.122403	2.50774	0.948506	744.382	17.6298	777.873	14.368	875.205	17.3505	744.382	17.6298
	EC1572_Spot 56	1008.05	106096	8.76869	14.6574	0.802064	1.2636	1.93944	0.134328	1.76582	0.91048	812.508	13.4801	829.524	10.9935	875.386	16.6209	812.508	13.4801
	EC1572_Spot 22	417.504	31808.6	1.65582	14.3617	0.72032	1.33902	2.68081	0.139474	2.58222	0.963225	841.685	20.3752	862.805	15.5842	917.473	14.8353	841.685	20.3752
	EC1572_Spot 57	201.858	49406.9	0.53189	13.8044	0.629109	1.65495	3.02153	0.165691	2.95531	0.978084	988.328	27.0794	991.446	19.1265	998.333	12.7689	998.333	12.7689
	EC1572_Spot 38	88.7946	15365	1.74745	13.8001	1.04292	1.44531	3.38444	0.144658	3.21974	0.951337	870.947	26.2306	907.926	20.3143	998.958	21.1753	998.958	21.1753
	EC1572_Spot 94	583.145	18799	2.55401	13.7755	0.760941	1.3361	3.26514	0.133489	3.17523	0.972465	807.738	24.1059	861.535	18.964	1002.59	15.4329	1002.59	15.4329
	EC1572_Spot 52	554.84	36968.3	2.21514	13.7719	0.727445	1.39425	2.23913	0.139262	2.11767	0.945756	840.49	16.6874	886.5	13.2405	1003.11	14.7487	1003.11	14.7487
	EC1572_Spot 115	191.546	18145.1	1.05023	13.7566	0.722208	1.6689	2.65539	0.16651	2.55529	0.962303	992.856	23.5133	996.768	16.8615	1005.37	14.6359	1005.37	14.6359
	EC1572_Spot 80	396.982	30239.7	3.60794	13.7238	0.594273	1.70174	2.20184	0.169382	2.12013	0.962889	1008.7	19.7967	1009.19	14.083	1010.21	12.05	1010.21	12.05
	EC1572_Spot 100	61.8603	9218.88	2.45168	13.6963	1.19533	1.52206	4.07162	0.151194	3.89221	0.955935	907.652	32.9537	939.306	24.9552	1014.28	24.205	1014.28	24.205
	EC1572_Spot 63	317.841	118960	2.51549	13.3975	0.529935	1.77301	2.0955	0.17228	2.02739	0.967495	1024.66	19.207	1035.62	13.6052	1058.86	10.6667	1058.86	10.6667
	EC1572_Spot 2	234.406	91102.2	3.10173	13.3697	0.815222	1.74184	2.3856	0.1689	2.24199	0.9398	1006.05	20.8836	1024.15	15.3896	1063.04	16.3885	1063.04	16.3885
	EC1572_Spot 50	72.2465	60095	1.64335	13.337	0.886085	1.55165	4.36607	0.15009	4.27521	0.97919	901.469	35.9667	951.152	26.9647	1067.96	17.7917	1067.96	17.7917
	EC1572_Spot 32	1077.85	439713	1.08503	13.021	0.54494	1.88429	2.15129	0.177947	2.08113	0.967386	1055.75	20.2667	1075.57	14.2714	1116	10.8762	1116	10.8762
	EC1572_Spot 86	304.94	104668	1.44431	12.9288	0.650477	2.03175	2.07052	0.190514	1.96568	0.949369	1124.16	20.2781	1126.2	14.0901	1130.15	12.9415	1130.15	12.9415
	EC1572_Spot 18	1056.34	234063	3.61375	12.771	0.556786	1.97441	1.5388	0.182878	1.43454	0.932244	1082.68	14.2972	1106.81	10.372	1154.54	11.0385	1154.54	11.0385
	EC1572_Spot 55	34.1269	9016.14	0.719805	12.6805	1.4469	1.70464	5.86675	0.156772	5.68553	0.969111	938.816	49.6729	1010.28	37.562	1168.63	28.6541	1168.63	28.6541
	EC1572_Spot 16	224.515	22108	1.6338	12.5852	0.989638	1.98101	3.02443	0.18082	2.85793	0.94495	1071.45	28.2122	1109.06	20.4106	1183.59	19.5554	1183.59	19.5554
	EC1572_Spot 116	552.379	448336	3.63794	12.4852	0.545599	2.06391	1.43916	0.18689	1.33173	0.925353	1104.51	13.518	1136.92	9.84394	1199.34	10.7381	1199.34	10.7381
	EC1572_Spot 44	281.938	57656.1	1.21176	9.29972	0.534072	4.59899	2.54283	0.310193	2.48611	0.977695	1741.65	37.9437	1749.09	21.2111	1757.96	9.76815	1757.96	9.76815
	EC1572_Spot 45	416.03	69930.7	2.01581	9.1549	0.579987	4.71086	1.77265	0.31279	1.67509	0.94496	1754.42	25.7285	1769.17	14.8485	1786.61	10.5686	1786.61	10.5686
	EC1572_Spot 117	972.838	504845	1.36882	8.23293	0.549549	5.51884	1.89084	0.329535	1.80921	0.956833	1836.13	28.9076	1903.54	16.2554	1977.82	9.78856	1977.82	9.78856
	EC1572_Spot 101	41.8709	16611.6	3.10682	7.40881	0.771512	7.65092	4.22498	0.411113	4.15394	0.983186	2220.01	78.0188	2190.86	37.9584	2163.67	13.4554	2163.67	13.4554
	EC1572_Spot 7	180.318	233556	2.1366	5.0792	0.60462	11.6227	2.68994	0.428157	2.62111	0.974412	2297.4	50.657	2574.5	25.1546	2800.5	9.89255	2800.5	9.89255
	EC1572_Spot 12	267.794	167328	2.94113	4.56863	0.686582	15.8541	2.17705	0.525323	2.06595	0.948968	2721.72	45.8679	2868.05	20.7967	2972.49	11.0642	2972.49	11.0642
13	EC1602
	EC1602_Spot 115	1230.2	107.1	0.488609	21.6582	9.76607	5.8286e-05	17.8105	9.15957e-06	14.8943	0.836261	0.0590461	0.00879443	0.0591808	0.0105401	6.57773	235.581	0.0590461	0.00879443
	EC1602_Spot 56	299.213	18202.2	1.50447	20.6583	1.80757	0.120005	2.58456	0.0179879	1.84733	0.714756	114.927	2.10427	115.077	2.81188	119.219	42.6197	114.927	2.10427
	EC1602_Spot 49	187.483	5894.62	2.51657	20.9856	1.63324	0.129722	2.92793	0.0197525	2.43008	0.829966	126.092	3.03437	123.848	3.41378	81.9948	38.7432	126.092	3.03437
	EC1602_Spot 62	285.341	19860.3	1.8103	20.9064	1.59507	0.138819	2.91695	0.021058	2.4422	0.837244	134.339	3.24688	131.992	3.6104	90.954	37.8199	134.339	3.24688
	EC1602_Spot 5	524.377	55229.6	1.56968	20.458	1.23503	0.147878	2.89343	0.021951	2.61661	0.904327	139.975	3.62312	140.037	3.78489	142.118	28.9657	139.975	3.62312
	EC1602_Spot 21	178.356	66987.3	1.53449	20.1199	1.60065	0.15857	3.07352	0.0231491	2.62382	0.853687	147.527	3.8269	149.45	4.27136	181.062	37.2956	147.527	3.8269
	EC1602_Spot 6	192.88	4062.04	1.41548	11.9868	3.04379	0.266319	3.61899	0.0231629	1.95766	0.54094	147.615	2.85695	239.746	7.72832	1279.16	59.3222	147.615	2.85695
	EC1602_Spot 40	161.62	8828.36	1.73957	20.4685	1.80586	0.157706	2.5137	0.0234219	1.74858	0.695622	149.246	2.57971	148.693	3.47691	140.924	42.387	149.246	2.57971
	EC1602_Spot 47	168.442	14142.1	1.61935	20.4972	1.59201	0.157615	2.73175	0.0234412	2.2199	0.81263	149.367	3.2777	148.613	3.77665	137.616	37.3896	149.367	3.2777
	EC1602_Spot 102	1024.74	85590.7	1.47891	20.1376	1.07043	0.160931	1.98164	0.0235144	1.66766	0.841553	149.829	2.46982	151.518	2.78926	179.015	24.9547	149.829	2.46982
	EC1602_Spot 81	509.749	61521.1	1.60442	20.5569	1.06467	0.158341	2.57437	0.0236178	2.3439	0.910475	150.48	3.48625	149.25	3.57322	130.796	25.0583	150.48	3.48625
	EC1602_Spot 35	140.783	5594.48	1.59382	21.1568	1.95225	0.154288	3.00678	0.0236848	2.2868	0.760547	150.902	3.41074	145.691	4.08086	62.7048	46.5043	150.902	3.41074
	EC1602_Spot 42	1792.19	63902	1.03252	20.4465	0.898697	0.159697	2.22923	0.023692	2.04005	0.915137	150.947	3.04363	150.438	3.11701	143.44	21.0772	150.947	3.04363
	EC1602_Spot 104	156.21	40387.6	1.58374	20.155	1.64973	0.162115	2.62479	0.023708	2.04155	0.777794	151.048	3.04787	152.553	3.71793	176.992	38.4822	151.048	3.04787
	EC1602_Spot 97	248.919	78338	1.45993	20.1879	1.32496	0.162148	2.3339	0.0237514	1.92135	0.823235	151.322	2.87356	152.582	3.30648	173.197	30.9111	151.322	2.87356
	EC1602_Spot 113	741.446	94113.1	1.0741	20.0006	1.01511	0.163741	2.00682	0.0237622	1.73116	0.862635	151.39	2.59026	153.972	2.86709	194.948	23.5963	151.39	2.59026
	EC1602_Spot 84	184.312	8465.77	2.14027	20.4496	1.98306	0.160319	2.7611	0.0237881	1.92124	0.695823	151.552	2.87771	150.983	3.87367	143.057	46.552	151.552	2.87771
	EC1602_Spot 79	161.099	121304	1.66581	20.3591	1.39461	0.161343	2.87523	0.0238339	2.51437	0.874491	151.841	3.77322	151.878	4.05597	153.479	32.6656	151.841	3.77322
	EC1602_Spot 3	196.654	12120.1	1.80635	20.3817	2.18948	0.161393	2.79791	0.0238677	1.74197	0.622599	152.054	2.61774	151.921	3.94794	150.9	51.3082	152.054	2.61774
	EC1602_Spot 69	321.821	60805.9	1.05543	20.5813	1.3642	0.160048	2.34149	0.0239007	1.90304	0.812745	152.261	2.86363	150.745	3.28018	128.011	32.1043	152.261	2.86363
	EC1602_Spot 38	1511.1	70936.2	1.60386	20.4001	1.05651	0.161686	2.20673	0.0239328	1.93738	0.877942	152.463	2.91913	152.178	3.11863	148.736	24.7681	152.463	2.91913
	EC1602_Spot 1	259.303	24266.7	1.45247	20.35	1.63726	0.162165	2.85771	0.0239448	2.3422	0.819607	152.539	3.53083	152.597	4.04893	154.493	38.3549	152.539	3.53083
	EC1602_Spot 95	312.941	14231.5	1.35638	19.9532	1.7693	0.165505	3.03807	0.0239613	2.4697	0.812919	152.643	3.72555	155.51	4.38052	200.455	41.0751	152.643	3.72555
	EC1602_Spot 100	206.407	10786.3	1.97628	20.9482	1.74705	0.157848	3.05442	0.0239924	2.50545	0.820271	152.839	3.78426	148.818	4.22813	86.2708	41.4583	152.839	3.78426
	EC1602_Spot 98	204.617	12079.5	1.685	18.3963	3.0255	0.17975	3.7158	0.0239931	2.15719	0.580545	152.843	3.25834	167.845	5.74863	385.917	67.9822	152.843	3.25834
	EC1602_Spot 109	896.861	91537.3	0.973493	20.4336	1.11992	0.162	2.55273	0.0240186	2.29396	0.898628	153.004	3.46851	152.453	3.61365	144.892	26.2623	153.004	3.46851
	EC1602_Spot 118	171.92	100020	1.82273	20.4645	2.22047	0.162429	3.12109	0.0241186	2.19333	0.702744	153.633	3.32984	152.827	4.42828	141.356	52.1286	153.633	3.32984
	EC1602_Spot 96	182.844	1.944e+06	1.69461	20.0451	1.48558	0.166125	2.8049	0.0241619	2.37919	0.848225	153.905	3.61834	156.05	4.05733	189.737	34.5499	153.905	3.61834
	EC1602_Spot 107	210.198	4114.58	1.6144	12.1651	3.93961	0.274324	4.4669	0.0242142	2.10539	0.471332	154.235	3.20871	246.145	9.76415	1250.33	77.1129	154.235	3.20871
	EC1602_Spot 32	295.662	38645	1.30545	20.3124	1.31611	0.164468	2.36141	0.0242398	1.96063	0.830282	154.396	2.99118	154.607	3.38654	158.875	30.7741	154.396	2.99118
	EC1602_Spot 23	305.725	8.71364e+06	1.35775	20.5161	1.21152	0.162903	2.57706	0.02425	2.27452	0.882604	154.46	3.47147	153.241	3.66557	135.457	28.4484	154.46	3.47147
	EC1602_Spot 92	724.961	74501.1	1.42002	20.3373	1.03204	0.164415	2.18202	0.0242618	1.92253	0.881076	154.534	2.93564	154.561	3.12842	155.967	24.1593	154.534	2.93564
	EC1602_Spot 80	1293.86	474920	1.39838	20.3289	0.977166	0.164671	2.31951	0.0242895	2.10363	0.90693	154.709	3.21576	154.784	3.32998	156.927	22.8659	154.709	3.21576
	EC1602_Spot 50	262.018	13250.7	1.56137	20.8783	1.2994	0.160607	2.78502	0.0243303	2.46331	0.884486	154.966	3.77177	151.235	3.91328	94.1519	30.7492	154.966	3.77177
	EC1602_Spot 33	501.638	27707.1	1.3417	20.5219	1.22027	0.163589	2.46146	0.0243591	2.13769	0.868464	155.147	3.27696	153.84	3.51382	134.758	28.6806	155.147	3.27696
	EC1602_Spot 67	817.167	323043	1.2087	20.1115	0.945959	0.167235	2.25366	0.0244039	2.04552	0.907643	155.429	3.14131	157.016	3.2786	182.03	22.0175	155.429	3.14131
	EC1602_Spot 91	573.977	89024.3	1.47616	19.9179	1.20343	0.169047	2.73998	0.0244308	2.46155	0.898384	155.598	3.78426	158.591	4.02303	204.572	27.9242	155.598	3.78426
	EC1602_Spot 27	314.95	40443.4	1.32323	20.5598	1.33625	0.164065	2.59355	0.024475	2.22282	0.857058	155.876	3.4233	154.255	3.71164	130.457	31.4218	155.876	3.4233
	EC1602_Spot 30	1647.33	90125	1.47527	20.3841	1.01866	0.166642	2.23831	0.024647	1.99308	0.890439	156.958	3.09052	156.501	3.24638	150.575	23.8495	156.958	3.09052
	EC1602_Spot 2	901.659	66760.8	1.57434	20.2687	1.04253	0.167687	2.45118	0.0246612	2.21842	0.905044	157.048	3.44188	157.41	3.5742	163.858	24.3597	157.048	3.44188
	EC1602_Spot 72	338.307	24615.2	1.374	18.6171	1.9482	0.18484	3.408	0.0249686	2.79625	0.820494	158.981	4.39114	172.217	5.39846	359.064	43.9592	158.981	4.39114
	EC1602_Spot 13	408.089	91612.6	1.18302	19.7627	1.2697	0.17432	3.15839	0.0249967	2.89193	0.915636	159.158	4.54639	163.162	4.76058	222.679	29.3653	159.158	4.54639
	EC1602_Spot 7	681.063	184008	0.97464	20.4693	1.23697	0.169959	2.85558	0.0252427	2.57377	0.90131	160.705	4.08503	159.384	4.21213	140.839	29.0273	160.705	4.08503
	EC1602_Spot 18	408.022	74136.2	1.89519	20.2962	0.967289	0.172047	3.12437	0.0253367	2.97087	0.950869	161.296	4.73245	161.194	4.65691	160.686	22.624	161.296	4.73245
	EC1602_Spot 108	693.281	63471.5	1.52325	19.9748	1.03682	0.183012	2.34789	0.0265247	2.10656	0.897214	168.761	3.50891	170.649	3.68808	197.933	24.1098	168.761	3.50891
	EC1602_Spot 111	367.973	646245	1.45456	17.6217	1.92118	0.207936	2.89112	0.0265867	2.16047	0.747278	169.15	3.60691	191.819	5.05342	481.786	42.4434	169.15	3.60691
	EC1602_Spot 61	797.358	40727.2	1.09329	20.2175	1.0295	0.186995	2.38613	0.0274313	2.15261	0.902135	174.451	3.7049	174.062	3.81687	169.773	24.0414	174.451	3.7049
	EC1602_Spot 59	553.375	40208	2.66824	20.2259	1.35305	0.187063	2.42227	0.0274526	2.00915	0.829447	174.586	3.46061	174.12	3.87587	168.798	31.6025	174.586	3.46061
	EC1602_Spot 51	267.118	9573.54	1.24244	20.8437	1.53028	0.182166	2.98273	0.0275505	2.56026	0.858361	175.199	4.42516	169.923	4.66698	98.1196	36.2003	175.199	4.42516
	EC1602_Spot 24	173.827	8030.59	1.44171	20.4896	1.57495	0.185624	2.86673	0.0275966	2.39535	0.835568	175.489	4.14687	172.889	4.5573	138.493	36.9698	175.489	4.14687
	EC1602_Spot 105	285.826	19326.8	1.66794	16.6816	2.92303	0.228059	4.04285	0.0276041	2.79295	0.690836	175.536	4.83647	208.595	7.62349	601.61	63.2979	175.536	4.83647
	EC1602_Spot 89	1686.57	81533.4	0.993393	19.7776	1.21118	0.192469	2.20037	0.0276199	1.83703	0.834873	175.635	3.18291	178.734	3.60613	220.912	28.008	175.635	3.18291
	EC1602_Spot 116	919.385	26075.8	1.07593	20.6076	1.16055	0.184764	2.32835	0.0276269	2.0185	0.866923	175.679	3.4982	172.152	3.68694	124.96	27.3039	175.679	3.4982
	EC1602_Spot 78	381.349	32856.1	1.59999	20.0434	1.14066	0.190184	2.45169	0.0276588	2.17018	0.885177	175.879	3.76529	176.786	3.97794	189.975	26.5472	175.879	3.76529
	EC1602_Spot 20	229.757	14556.9	1.89795	20.2171	1.50974	0.188554	2.71639	0.0276593	2.2582	0.831324	175.882	3.91808	175.395	4.37564	169.821	35.2466	175.882	3.91808
	EC1602_Spot 87	355.197	963291	2.28161	19.9247	1.3912	0.191683	2.30757	0.0277117	1.84104	0.797829	176.21	3.20017	178.064	3.76884	203.729	32.3069	176.21	3.20017
	EC1602_Spot 99	707.154	98172.3	1.09743	20.2832	1.19533	0.188519	2.26661	0.0277447	1.9258	0.849639	176.417	3.35138	175.364	3.65054	162.184	27.9688	176.417	3.35138
	EC1602_Spot 26	497.306	3.90176e+06	1.77997	20.3568	1.01792	0.188029	2.49983	0.027773	2.2832	0.913341	176.595	3.97729	174.946	4.01736	153.714	23.8397	176.595	3.97729
	EC1602_Spot 66	553.076	204435	1.53206	20.0348	1.07689	0.192268	2.36947	0.02795	2.11061	0.890754	177.705	3.69945	178.563	3.87987	190.967	25.0502	177.705	3.69945
	EC1602_Spot 63	704.637	57270.4	1.2095	20.236	1.02965	0.190923	2.40293	0.0280331	2.17115	0.903543	178.226	3.81656	177.417	3.91154	167.636	24.0537	178.226	3.81656
	EC1602_Spot 48	199.19	14208.6	1.41848	20.5098	1.73323	0.188733	3.02525	0.0280864	2.47953	0.81961	178.561	4.36671	175.548	4.87707	136.154	40.724	178.561	4.36671
	EC1602_Spot 101	1012.93	53602	0.693869	20.3443	1.10022	0.190366	2.62995	0.0281009	2.38875	0.908289	178.652	4.20896	176.942	4.2706	155.193	25.7409	178.652	4.20896
	EC1602_Spot 16	364.464	39902.6	1.57959	20.3621	1.55917	0.190323	2.97705	0.0281191	2.5361	0.851883	178.765	4.47138	176.905	4.83332	153.108	36.5113	178.765	4.47138
	EC1602_Spot 17	451.685	18589.1	1.9118	20.2788	1.36981	0.19114	2.65385	0.0281243	2.273	0.856492	178.798	4.00824	177.601	4.32412	162.698	32.0405	178.798	4.00824
	EC1602_Spot 31	253.466	24625.4	1.637	20.0308	1.29462	0.193976	2.45421	0.0281925	2.08497	0.84955	179.226	3.68534	180.016	4.04851	191.44	30.0932	179.226	3.68534
	EC1602_Spot 9	222.553	16116.4	1.35723	21.1628	1.60448	0.184099	2.9382	0.0282693	2.46144	0.837736	179.707	4.36229	171.582	4.63852	61.9895	38.2202	179.707	4.36229
	EC1602_Spot 14	272.917	241480	1.81268	19.8749	1.2398	0.196678	2.41252	0.0283628	2.06958	0.85785	180.293	3.67962	182.311	4.02607	209.553	28.7542	180.293	3.67962
	EC1602_Spot 25	421.034	29434.1	1.74928	20.2568	1.12062	0.194832	2.80317	0.0286365	2.56943	0.916616	182.009	4.61119	180.744	4.64127	165.234	26.2102	182.009	4.61119
	EC1602_Spot 44	340.813	43182.4	1.1619	19.523	1.79118	0.202724	3.1314	0.0287171	2.56853	0.82025	182.514	4.62219	187.429	5.35935	250.788	41.2282	182.514	4.62219
	EC1602_Spot 11	400.394	354619	1.24397	19.9669	1.27184	0.199136	2.84634	0.0288502	2.54639	0.894617	183.348	4.60299	184.395	4.79957	198.835	29.5536	183.348	4.60299
	EC1602_Spot 41	232.316	14923.3	1.18833	20.1849	1.38285	0.197556	2.88958	0.0289338	2.53721	0.878053	183.872	4.5993	183.056	4.8402	173.537	32.2661	183.872	4.5993
	EC1602_Spot 103	719.128	44343.8	1.38941	20.1788	1.11843	0.198323	2.88568	0.0290373	2.66012	0.921837	184.52	4.83888	183.706	4.84931	174.241	26.0955	184.52	4.83888
	EC1602_Spot 114	345.084	29404	1.16036	17.3947	2.53529	0.230114	3.52363	0.0290435	2.4471	0.694482	184.559	4.4523	210.293	6.69306	510.344	55.7443	184.559	4.4523
	EC1602_Spot 58	200.158	6051.21	1.48091	20.9525	2.88683	0.192006	3.63349	0.0291902	2.20645	0.607255	185.478	4.03418	178.339	5.94284	85.7818	68.5042	185.478	4.03418
	EC1602_Spot 39	164.493	5490.06	1.1955	20.9781	1.38854	0.191904	2.85373	0.0292105	2.49314	0.873642	185.605	4.56141	178.252	4.6654	82.8327	32.9519	185.605	4.56141
	EC1602_Spot 43	432.805	43575.3	1.57247	18.9174	1.79233	0.21292	2.61585	0.0292257	1.90532	0.728373	185.701	3.48771	196	4.66263	322.875	40.691	185.701	3.48771
	EC1602_Spot 36	403.109	160065	1.46493	19.9582	0.838458	0.202019	1.91066	0.0292551	1.71686	0.898569	185.885	3.14581	186.833	3.26059	199.827	19.4786	185.885	3.14581
	EC1602_Spot 53	359.204	88486.2	1.02011	19.4484	1.52725	0.207513	2.44446	0.0292831	1.90864	0.780802	186.06	3.50046	191.464	4.2655	259.597	35.0762	186.06	3.50046
	EC1602_Spot 54	356.562	38234.2	1.5656	20.0922	1.1425	0.201502	2.34546	0.0293762	2.04838	0.873339	186.643	3.76834	186.397	3.99406	184.268	26.6164	186.643	3.76834
	EC1602_Spot 120	459.082	128492	1.11144	20.4963	1.04248	0.197658	2.48522	0.0293952	2.25601	0.907769	186.762	4.15292	183.142	4.16466	137.743	24.4905	186.762	4.15292
	EC1602_Spot 28	354.028	28167.9	1.66133	20.2108	1.29275	0.201037	2.85438	0.0294813	2.54485	0.891561	187.301	4.69796	186.003	4.85137	170.549	30.1976	187.301	4.69796
	EC1602_Spot 93	181.046	16973.8	2.0386	20.4752	1.87296	0.199073	3.16536	0.0295752	2.55177	0.806154	187.889	4.72531	184.341	5.33609	140.144	43.9728	187.889	4.72531
	EC1602_Spot 75	178.924	5964.84	1.90946	21.2196	1.41503	0.193087	2.76383	0.0297288	2.37412	0.858997	188.851	4.41851	179.26	4.54177	55.6094	33.7526	188.851	4.41851
	EC1602_Spot 71	246.63	13677.5	1.71128	20.6786	1.15123	0.198698	2.54337	0.0298128	2.2679	0.891693	189.377	4.23241	184.024	4.2808	116.882	27.1319	189.377	4.23241
	EC1602_Spot 8	331.513	137335	0.798989	19.7615	1.10715	0.236296	2.68802	0.0338817	2.44942	0.911236	214.797	5.1746	215.383	5.21676	222.786	25.614	214.797	5.1746
	EC1602_Spot 94	639.86	28370.8	1.67441	19.7305	1.09438	0.252973	2.65332	0.0362161	2.41711	0.910977	229.336	5.44586	228.989	5.43947	226.455	25.3069	229.336	5.44586
	EC1602_Spot 77	1019.47	51306.9	7.65345	20.0163	1.23032	0.251348	3.28082	0.0365047	3.0414	0.927023	231.131	6.90508	227.671	6.69139	193.116	28.6309	231.131	6.90508
	EC1602_Spot 117	345.133	13805	3.83238	16.5458	3.07703	0.310278	4.05206	0.0372501	2.6365	0.650655	235.765	6.10364	274.397	9.74333	619.281	66.4398	235.765	6.10364
	EC1602_Spot 19	1886.29	470881	8.91025	19.678	0.804242	0.261455	1.85716	0.0373307	1.67398	0.90137	236.266	3.88346	235.839	3.90846	232.567	18.5438	236.266	3.88346
	EC1602_Spot 57	314.875	33213.5	3.42397	19.8495	1.14814	0.263233	2.44422	0.0379121	2.15777	0.882806	239.878	5.08092	237.269	5.17168	212.501	26.6245	239.878	5.08092
	EC1602_Spot 29	267.993	1.96159e+06	4.32967	20.1667	1.24689	0.259682	2.24564	0.0379984	1.86766	0.831684	240.414	4.40743	234.411	4.70061	175.64	29.0861	240.414	4.40743
	EC1602_Spot 112	384.299	28526.2	3.92108	19.9997	1.10014	0.272349	2.62099	0.0395218	2.37893	0.907644	249.868	5.83045	244.57	5.69665	195.055	25.584	249.868	5.83045
	EC1602_Spot 10	379.756	96038.1	3.7776	19.5603	1.05396	0.279275	2.15663	0.0396366	1.88155	0.872448	250.58	4.62434	250.082	4.78055	246.424	24.2481	250.58	4.62434
	EC1602_Spot 34	226.359	81901.3	1.47726	17.2714	1.02167	0.681435	2.35956	0.0853963	2.1269	0.901398	528.252	10.7874	527.641	9.71	525.932	22.4103	528.252	10.7874
	EC1602_Spot 37	72.3179	384387	1.24515	16.4937	1.25864	0.82371	2.56755	0.0985781	2.23789	0.871604	606.071	12.9451	610.116	11.7757	626.084	27.1325	606.071	12.9451
	EC1602_Spot 83	409.741	241914	1.97628	14.0083	0.830922	1.67032	2.60911	0.169774	2.47326	0.947933	1010.87	23.1398	997.308	16.5729	968.515	16.941	968.515	16.941
	EC1602_Spot 64	537.807	191634	6.16893	13.8663	0.8878	1.58985	2.19105	0.159957	2.00312	0.914231	956.54	17.8069	966.239	13.6581	989.235	18.0501	989.235	18.0501
	EC1602_Spot 119	126.679	115331	3.07906	13.7661	1.04088	1.67942	2.4287	0.167749	2.19435	0.903507	999.696	20.3206	1000.76	15.4581	1003.96	21.1074	1003.96	21.1074
	EC1602_Spot 90	59.3264	29275.6	1.28826	13.7353	0.907931	1.64751	2.62997	0.164192	2.46828	0.93852	980.031	22.441	988.595	16.6192	1008.52	18.3957	1008.52	18.3957
	EC1602_Spot 85	124.043	70539.3	2.37134	13.6996	0.833519	1.67927	2.36544	0.166923	2.21372	0.93586	995.135	20.4135	1000.7	15.0549	1013.79	16.8726	1013.79	16.8726
	EC1602_Spot 55	589.796	415185	1.68016	13.4445	1.13243	1.83146	3.06929	0.178661	2.85274	0.929447	1059.66	27.8756	1056.8	20.161	1051.81	22.8377	1051.81	22.8377
	EC1602_Spot 12	1199.53	63770.9	8.33363	13.2342	1.20573	1.79127	2.62978	0.172008	2.33708	0.888699	1023.16	22.1112	1042.29	17.1376	1083.46	24.1735	1083.46	24.1735
	EC1602_Spot 65	214.405	142363	0.93988	12.6129	0.947902	2.23756	2.27631	0.204775	2.06956	0.909172	1200.92	22.6762	1192.89	15.9755	1179.24	18.7439	1179.24	18.7439
	EC1602_Spot 46	94.5827	204323	1.3296	12.4228	1.09411	2.27867	2.23073	0.205394	1.94399	0.871457	1204.23	21.3537	1205.7	15.7433	1209.19	21.5412	1209.19	21.5412
	EC1602_Spot 68	218.585	339225	1.51653	12.3239	0.809829	2.30425	2.0027	0.206047	1.83167	0.914596	1207.72	20.1729	1213.6	14.1818	1224.9	15.897	1224.9	15.897
	EC1602_Spot 74	141	57935.6	1.42113	11.9278	0.804088	2.6255	2.16843	0.227227	2.01383	0.928706	1319.95	24.0369	1307.8	15.9461	1288.77	15.6322	1288.77	15.6322
	EC1602_Spot 45	183.207	83053.7	1.00444	11.8411	1.0392	2.50036	2.45803	0.214824	2.22755	0.906234	1254.46	25.3932	1272.14	17.83	1302.96	20.1872	1302.96	20.1872
	EC1602_Spot 15	92.7346	31862.8	1.81705	11.7271	0.927136	2.80489	2.23088	0.238669	2.02909	0.909551	1379.77	25.2036	1356.84	16.7001	1321.72	17.9632	1321.72	17.9632
	EC1602_Spot 22	24.4339	6939.11	1.77407	11.3066	1.21931	2.89248	2.6639	0.237295	2.36847	0.889099	1372.62	29.2823	1379.95	20.1025	1392.13	23.3932	1392.13	23.3932
	EC1602_Spot 73	110.569	83091.1	0.618726	10.6593	1.15165	3.33131	2.34582	0.257651	2.04366	0.871194	1477.81	26.9899	1488.42	18.3218	1504.37	21.7617	1504.37	21.7617
	EC1602_Spot 88	50.7734	27617.5	0.974769	10.5498	1.03958	3.53827	2.23766	0.270847	1.98151	0.885529	1545.1	27.2237	1535.81	17.7161	1523.85	19.5929	1523.85	19.5929
	EC1602_Spot 4	79.4107	384451	0.920284	10.4466	0.80811	3.4205	2.47227	0.259269	2.33647	0.94507	1486.1	31.0109	1509.12	19.4266	1542.37	15.1942	1542.37	15.1942
	EC1602_Spot 76	216.443	115107	5.4946	10.1565	0.641659	3.86659	2.20673	0.284944	2.11138	0.956792	1616.22	30.183	1606.74	17.8044	1595.13	11.9815	1595.13	11.9815
	EC1602_Spot 52	211.684	179845	1.12203	9.24132	0.945797	4.77491	3.03984	0.320175	2.88896	0.950366	1790.58	45.1671	1780.5	25.5265	1769.47	17.2723	1769.47	17.2723
	EC1602_Spot 86	122.555	167084	1.17785	9.03897	0.854806	4.81961	2.28377	0.316096	2.11776	0.927309	1770.63	32.7891	1788.33	19.2067	1809.81	15.533	1809.81	15.533
	EC1602_Spot 110	165.732	76172.3	0.996571	8.75789	0.821642	5.08832	2.30997	0.323341	2.15891	0.934603	1806.03	34.0053	1834.16	19.6051	1867.01	14.8268	1867.01	14.8268
	EC1602_Spot 60	411.161	663898	6.82994	4.4625	0.898789	16.7032	2.69277	0.540837	2.53834	0.942651	2786.95	57.4367	2917.95	25.803	3010.3	14.4379	3010.3	14.4379
14	EC15191606
	EC1606_Spot 87	394.171	51.4	1.0381	21.6676	25.8753	0.000149789	31.6799	2.35493e-05	18.278	0.57696	0.151807	0.027747	0.152082	0.0481758	5.55819	632.105	0.151807	0.027747
	EC1606_Spot 59	231.93	44.8	4.75594	20.6116	19.3633	0.000170494	28.2352	2.54981e-05	20.5497	0.727804	0.164369	0.033777	0.173102	0.0488715	124.504	459.643	0.164369	0.033777
	EC1606_Spot 66	97.5682	40	5.63705	2	0.457403	0.00286467	17.4163	4.15712e-05	17.4103	0.999655	0.26798	0.0466551	2.90458	0.505148	NA	NA	0.26798	0.0466551
	EC1606_Spot 119	121.261	84.2	3.66571	21.6189	49.5187	0.00044629	52.7637	7.00064e-05	18.2183	0.345281	0.451274	0.0822117	0.453054	0.238994	10.9678	1262.57	0.451274	0.0822117
	EC1606_Spot 108	73.5899	125	2.22063	21.6496	41.3253	0.00200099	41.916	0.000314327	7.01203	0.167288	2.02596	0.142039	2.02974	0.849936	7.56676	1034.14	2.02596	0.142039
	EC1606_Spot 32	164.343	21704.5	3.16027	22.1339	2.47036	0.0374697	3.99969	0.00601763	3.14561	0.786464	38.6759	1.21295	37.3506	1.46677	NA	NA	38.6759	1.21295
	EC1519_Spot 16	365.985	2920.16	2.11891	21.1493	2.79637	0.0467339	3.35156	0.00716847	1.84751	0.551238	46.0461	0.847673	46.3774	1.5194	63.5648	66.5984	46.0461	0.847673
	EC1519_Spot 25	381.684	16169	2.25203	20.7576	1.65752	0.0855736	2.65639	0.0128829	2.07582	0.781444	82.5183	1.70202	83.3716	2.12619	107.905	39.1615	82.5183	1.70202
	EC1519_Spot 5	958.986	27920.4	0.985142	20.324	1.04795	0.143993	1.97226	0.0212251	1.67081	0.847156	135.394	2.23858	136.594	2.52065	157.499	24.5045	135.394	2.23858
	EC1606_Spot 99	51.8518	1298.05	3.90252	25.9637	15.1787	0.112899	15.4404	0.0212689	2.83084	0.18334	135.67	3.80048	108.614	15.9059	NA	NA	135.67	3.80048
	EC1606_Spot 116	251.247	10148.8	2.32833	20.8475	1.39748	0.144721	2.99381	0.0218914	2.64764	0.884369	139.599	3.65633	137.24	3.84316	97.6798	33.0572	139.599	3.65633
	EC1606_Spot 73	1089.18	34885.5	2.17371	19.8092	0.99326	0.152774	3.00709	0.0219585	2.83831	0.943874	140.022	3.93142	144.358	4.04654	217.239	22.9813	140.022	3.93142
	EC1606_Spot 77	114.771	9270.58	4.15172	21.1303	2.32566	0.143644	3.64918	0.0220232	2.81208	0.770608	140.43	3.90631	136.284	4.65397	65.6649	55.3746	140.43	3.90631
	EC1606_Spot 96	290.971	19879.2	2.30231	18.4476	1.23314	0.168022	2.56165	0.0224902	2.24531	0.876509	143.375	3.18367	157.701	3.74168	379.661	27.7241	143.375	3.18367
	EC1606_Spot 53	216.408	111096	3.64096	20.0373	1.12825	0.15514	3.32377	0.0225555	3.12641	0.940624	143.786	4.44559	146.441	4.53267	190.686	26.2589	143.786	4.44559
	EC1606_Spot 68	245.898	18051	2.70406	21.0661	1.1077	0.14886	2.90892	0.0227536	2.68976	0.924659	145.035	3.85755	140.905	3.82715	72.8972	26.3336	145.035	3.85755
	EC1606_Spot 6	1027.43	64535.6	1.70486	20.5228	0.821546	0.154146	2.3783	0.0229539	2.2319	0.938443	146.298	3.22844	145.566	3.22529	134.702	19.2869	146.298	3.22844
	EC1606_Spot 38	837.112	26455.1	2.10062	20.7935	1.29896	0.153164	3.01861	0.0231086	2.72484	0.902677	147.272	3.96744	144.702	4.07105	103.789	30.7192	147.272	3.96744
	EC1519_Spot 28	173.979	3495.42	1.9793	21.7245	4.83032	0.146862	5.50735	0.0231397	2.64556	0.480368	147.468	3.85708	139.137	7.16107	0.73538	116.483	147.468	3.85708
	EC1606_Spot 102	194.376	25262.6	2.12619	21.0811	1.33501	0.151336	2.95931	0.0231485	2.64107	0.892463	147.524	3.85198	143.091	3.94969	71.2478	31.7372	147.524	3.85198
	EC1606_Spot 58	118.259	6986.51	2.45157	20.7639	1.77955	0.15378	3.77424	0.0231684	3.32838	0.881867	147.649	4.85848	145.244	5.10786	107.18	42.045	147.649	4.85848
	EC1606_Spot 15	71.9366	7197.63	2.68361	21.7533	2.47879	0.146954	4.29753	0.0231949	3.51061	0.816889	147.816	5.1302	139.218	5.59097	NA	NA	147.816	5.1302
	EC1606_Spot 110	139.636	9687.64	1.99849	21.0612	1.58832	0.151964	3.24024	0.0232226	2.82425	0.871618	147.99	4.13201	143.644	4.3402	73.4497	37.783	147.99	4.13201
	EC1519_Spot 19	1340.67	153740	1.11158	20.2412	0.635764	0.158203	1.50944	0.0232246	1.36902	0.906971	148.003	2.0031	149.129	2.09351	167.041	14.8309	148.003	2.0031
	EC1606_Spot 85	78.9543	5258.71	2.10058	21.626	2.41905	0.148143	3.54252	0.0232458	2.58798	0.730548	148.137	3.79004	140.271	4.6412	10.1735	58.1938	148.137	3.79004
	EC1519_Spot 22	234.182	8090.23	1.92201	21.6583	1.64126	0.148043	2.68584	0.0232546	2.12602	0.791569	148.192	3.11467	140.182	3.51673	6.57574	39.5118	148.192	3.11467
	EC1606_Spot 69	165.801	29363.6	2.04276	20.1015	1.59477	0.159627	3.55488	0.0232822	3.17708	0.893725	148.366	4.65989	150.377	4.96875	183.186	37.1429	148.366	4.65989
	EC1519_Spot 6	908.515	13744.7	0.885628	19.4551	1.32393	0.165166	4.20664	0.0233053	3.99287	0.949183	148.511	5.86208	155.215	6.05484	258.8	30.4239	148.511	5.86208
	EC1606_Spot 40	507.342	30810.4	3.68119	20.7222	1.48253	0.155173	3.4599	0.0233312	3.12618	0.903547	148.675	4.59466	146.469	4.71916	111.903	35.0157	148.675	4.59466
	EC1606_Spot 117	91.2267	4921.05	2.05737	21.7851	1.86084	0.147709	3.59196	0.0233483	3.07237	0.855346	148.783	4.5188	139.887	4.69396	NA	NA	148.783	4.5188
	EC1606_Spot 41	94.1171	61458.2	2.45544	19.9351	2.48379	0.16149	3.96185	0.0233589	3.08659	0.779078	148.849	4.54173	152.007	5.59323	202.547	57.6831	148.849	4.54173
	EC1606_Spot 90	78.8988	3715.48	2.46637	21.512	2.04489	0.149766	3.4868	0.0233767	2.82422	0.809975	148.961	4.15877	141.705	4.61174	22.8556	49.0636	148.961	4.15877
	EC1519_Spot 4	473.858	6435.48	1.59507	21.6961	1.09452	0.148612	1.90764	0.0233848	1.56241	0.819027	149.013	2.30149	140.686	2.50616	2.4038	26.3644	149.013	2.30149
	EC1606_Spot 34	108.804	5594.4	2.0281	21.4754	2.56681	0.150303	3.59593	0.0234204	2.51837	0.70034	149.237	3.71518	142.179	4.77088	26.9478	61.5641	149.237	3.71518
	EC1606_Spot 5	115	7646.68	2.55975	20.9633	2.14014	0.15418	3.40395	0.0234518	2.64702	0.77763	149.434	3.91006	145.596	4.61713	84.5139	50.7792	149.434	3.91006
	EC1606_Spot 50	271.542	11838.2	3.57994	20.601	1.53414	0.157086	3.6296	0.0234809	3.28944	0.906282	149.618	4.8649	148.149	5.00338	125.709	36.1067	149.618	4.8649
	EC1606_Spot 28	108.139	59140.6	1.83428	20.08	1.92214	0.161496	3.71987	0.0235295	3.18478	0.856153	149.924	4.71966	152.012	5.25178	185.688	44.7472	149.924	4.71966
	EC1606_Spot 20	143.867	6137.66	2.73266	21.6717	3.2013	0.149668	4.49498	0.0235347	3.1554	0.701983	149.957	4.67712	141.619	5.94181	5.08252	77.0836	149.957	4.67712
	EC1606_Spot 24	117.783	9595.85	1.78704	20.928	1.97111	0.15512	3.38309	0.023555	2.74955	0.812734	150.084	4.07898	146.423	4.61304	88.5602	46.7174	150.084	4.07898
	EC1606_Spot 111	110.41	14062.8	2.51874	20.4348	1.95065	0.159229	3.47719	0.0236092	2.8785	0.827825	150.426	4.27988	150.028	4.8497	144.748	45.7724	150.426	4.27988
	EC1606_Spot 49	71.6158	18136.9	2.18796	20.8017	1.88337	0.156439	3.76719	0.0236118	3.26261	0.866059	150.442	4.85151	147.581	5.17454	102.872	44.5124	150.442	4.85151
	EC1606_Spot 84	99.042	6717.75	2.32845	21.6359	2.36252	0.150426	3.44621	0.0236149	2.50896	0.728034	150.462	3.73131	142.288	4.5755	9.10602	56.8552	150.462	3.73131
	EC1606_Spot 61	193.441	209378	2.95664	20.6337	1.19409	0.15789	3.19351	0.0236385	2.96186	0.927464	150.61	4.40916	148.855	4.42169	122.018	28.1247	150.61	4.40916
	EC1606_Spot 31	187.007	7031.08	2.39017	20.7422	1.50139	0.157083	3.63213	0.0236413	3.30729	0.910566	150.628	4.92396	148.146	5.00678	109.612	35.4387	150.628	4.92396
	EC1606_Spot 89	102.084	12087.5	2.20406	20.6759	1.82559	0.157789	3.31544	0.0236716	2.76755	0.834746	150.819	4.12553	148.766	4.58796	117.208	43.0595	150.819	4.12553
	EC1606_Spot 26	138.674	5411.56	2.94912	21.7323	1.8263	0.150119	2.80375	0.0236717	2.12735	0.758752	150.82	3.17122	142.017	3.7159	NA	NA	150.82	3.17122
	EC1606_Spot 92	285.243	16268	2.6367	20.5282	1.29096	0.158959	2.905	0.0236767	2.6024	0.895833	150.851	3.88017	149.791	4.04571	134.088	30.3325	150.851	3.88017
	EC1606_Spot 82	198.465	15209.7	1.76897	20.8321	1.88284	0.156701	3.78696	0.023686	3.28572	0.867641	150.909	4.90088	147.811	5.20924	99.4287	44.5268	150.909	4.90088
	EC1519_Spot 18	213.385	27652.3	1.71237	20.6847	1.74358	0.158052	2.97614	0.0237108	2.41192	0.810418	151.066	3.60122	148.996	4.12436	116.174	41.1284	151.066	3.60122
	EC1606_Spot 101	138.328	74771.3	2.59107	20.7	1.86168	0.15795	3.01696	0.0237235	2.37406	0.786907	151.146	3.54656	148.907	4.1786	114.41	43.9113	151.146	3.54656
	EC1606_Spot 46	103.496	289803	2.73933	17.4769	2.61424	0.187366	4.23839	0.0237599	3.33611	0.787119	151.375	4.9912	174.379	6.79115	499.979	57.5986	151.375	4.9912
	EC1606_Spot 71	115.805	5278.84	2.55788	22.1378	3.60333	0.147945	4.79244	0.0237641	3.15967	0.659302	151.401	4.72804	140.095	6.27148	NA	NA	151.401	4.72804
	EC1606_Spot 75	123.283	5955.76	2.60553	21.6393	1.97944	0.151397	3.44799	0.0237711	2.82319	0.818795	151.445	4.22576	143.144	4.60352	8.72359	47.6159	151.445	4.22576
	EC1606_Spot 60	188.585	13721.7	1.56999	20.9152	1.28639	0.156866	3.43975	0.0238054	3.19015	0.927437	151.662	4.78177	147.956	4.73593	89.9879	30.472	151.662	4.78177
	EC1606_Spot 4	386.448	33404.9	1.98015	20.7489	1.1086	0.158484	3.09596	0.0238599	2.89067	0.933691	152.005	4.34256	149.376	4.30055	108.863	26.2034	152.005	4.34256
	EC1606_Spot 19	102.561	10611.8	2.98623	20.7641	1.87164	0.158397	3.17407	0.0238643	2.56353	0.807648	152.032	3.8518	149.299	4.40696	107.156	44.2235	152.032	3.8518
	EC1606_Spot 8	152.768	5899.67	2.67486	21.3146	2.40589	0.154592	3.75685	0.0239085	2.88541	0.768041	152.311	4.34328	145.958	5.10759	44.9409	57.503	152.311	4.34328
	EC1606_Spot 113	357.594	1.42177e+06	2.27076	20.5409	1.25694	0.160668	2.68124	0.0239462	2.36836	0.883308	152.548	3.57047	151.288	3.76868	132.589	29.5476	152.548	3.57047
	EC1606_Spot 79	107.935	9175.88	2.7402	21.153	1.48006	0.156135	2.85324	0.0239641	2.43934	0.854937	152.661	3.68016	147.315	3.91258	63.0972	35.2589	152.661	3.68016
	EC1606_Spot 114	299.051	16523.3	3.2853	20.9729	1.09704	0.15764	2.78185	0.023989	2.5564	0.918957	152.817	3.86068	148.635	3.84643	83.4276	26.0509	152.817	3.86068
	EC1606_Spot 91	69.8614	16607.8	2.33305	20.7716	2.01095	0.159171	3.5387	0.0239895	2.91178	0.82284	152.821	4.39748	149.977	4.93394	106.262	47.4952	152.821	4.39748
	EC1606_Spot 115	624.216	14092.5	1.25143	16.5584	0.976317	0.199695	2.75667	0.0239924	2.57799	0.935183	152.838	3.89382	184.868	4.65923	617.643	21.0971	152.838	3.89382
	EC1606_Spot 112	396.728	24452.8	2.39649	20.6898	1.0242	0.160001	2.71418	0.0240196	2.51352	0.92607	153.01	3.80065	150.704	3.80132	115.622	24.1706	153.01	3.80065
	EC1606_Spot 3	315.512	10516.2	3.96865	20.2896	1.15171	0.163256	3.20275	0.0240342	2.98851	0.933107	153.102	4.52156	153.549	4.56404	161.481	26.9136	153.102	4.52156
	EC1606_Spot 54	160.322	7922.07	2.16766	21.8084	1.46369	0.15198	2.82603	0.024049	2.41744	0.855421	153.195	3.65975	143.659	3.78573	NA	NA	153.195	3.65975
	EC1606_Spot 48	115.039	32187.1	2.77799	20.2325	1.78714	0.163939	3.51392	0.0240668	3.02552	0.86101	153.307	4.58361	154.145	5.02547	168.045	41.7481	153.307	4.58361
	EC1606_Spot 21	689.567	26700	2.13737	20.4202	1.12546	0.162552	3.05051	0.0240845	2.8353	0.929452	153.419	4.29853	152.934	4.33095	146.475	26.3934	153.419	4.29853
	EC1606_Spot 98	192.844	16674	3.9472	21.179	2.09458	0.15713	3.81297	0.0241464	3.18613	0.835605	153.808	4.84254	148.188	5.25743	60.1911	49.9391	153.808	4.84254
	EC1606_Spot 22	445.233	2.62588e+06	3.12651	20.1686	1.16616	0.16554	2.98667	0.0242251	2.7496	0.920623	154.304	4.19236	155.541	4.30722	175.426	27.1904	154.304	4.19236
	EC1606_Spot 12	886.722	34052.8	5.79161	20.2717	0.933776	0.165262	2.63606	0.0243081	2.46513	0.935158	154.826	3.77118	155.299	3.79608	163.516	21.8104	154.826	3.77118
	EC1606_Spot 10	200.56	56340.9	3.14254	20.4312	1.70365	0.16442	3.34635	0.0243746	2.88022	0.860704	155.245	4.41797	154.565	4.7979	145.159	39.9657	155.245	4.41797
	EC1606_Spot 107	362.118	11390.7	2.71537	20.8149	1.14961	0.16154	2.70394	0.0243973	2.44738	0.905118	155.387	3.75746	152.05	3.81834	101.338	27.1994	155.387	3.75746
	EC1606_Spot 47	142.991	67081.9	2.07898	20.5124	1.89979	0.164416	3.75624	0.0244708	3.24038	0.862668	155.85	4.98957	154.561	5.38546	135.897	44.6445	155.85	4.98957
	EC1606_Spot 18	182.997	62809.8	2.1146	20.4118	1.72688	0.165823	3.26133	0.0245592	2.76661	0.848308	156.406	4.27508	155.788	4.71021	147.411	40.4718	156.406	4.27508
	EC1606_Spot 105	107.142	7017.29	1.80747	21.2148	1.34927	0.16039	3.03532	0.024689	2.71894	0.895767	157.223	4.22308	151.045	4.26001	56.1812	32.1851	157.223	4.22308
	EC1606_Spot 118	88.2772	4994.13	1.96301	23.2424	2.37316	0.148875	9.81572	0.0251068	9.52452	0.970333	159.85	15.0378	140.918	12.9159	NA	NA	159.85	15.0378
	EC1519_Spot 2	589.355	13229	2.2001	20.2649	1.09648	0.184123	2.19805	0.0270614	1.90503	0.866693	172.13	3.23575	171.602	3.4704	164.303	25.63	172.13	3.23575
	EC1606_Spot 52	89.2595	6985.23	3.64972	20.667	2.79774	0.180609	3.90385	0.0270835	2.72262	0.69742	172.269	4.62811	168.584	6.06402	118.216	65.9542	172.269	4.62811
	EC1606_Spot 74	259.876	56979.1	2.99223	20.0718	1.2146	0.188144	3.67057	0.0274008	3.46379	0.943665	174.261	5.95517	175.044	5.90186	186.634	28.2653	174.261	5.95517
	EC1519_Spot 12	212.418	4137.46	2.67952	21.5081	1.63621	0.176057	2.71426	0.0274635	2.16564	0.797877	174.654	3.7316	164.662	4.12581	23.3361	39.2465	174.654	3.7316
	EC1606_Spot 13	139.019	66506	2.7135	19.8631	1.43709	0.190563	2.69476	0.0274646	2.27959	0.845932	174.66	3.92808	177.109	4.37965	210.915	33.3185	174.66	3.92808
	EC1606_Spot 17	869.755	53148	0.870143	19.5342	1.01156	0.194474	3.18897	0.0275642	3.02428	0.948357	175.285	5.22971	180.44	5.27194	249.516	23.2813	175.285	5.22971
	EC1606_Spot 65	379.854	40578.4	1.78988	19.6417	1.46074	0.193551	2.82908	0.0275843	2.42279	0.856388	175.412	4.19256	179.655	4.65835	236.843	33.6865	175.412	4.19256
	EC1606_Spot 100	278.492	29400.3	2.79449	20.5736	1.2034	0.185492	3.47769	0.02769	3.26284	0.938222	176.074	5.66728	172.775	5.52524	128.896	28.3233	176.074	5.66728
	EC1519_Spot 23	955.253	28131.7	1.04082	20.1447	0.809145	0.189663	1.94654	0.0277103	1.77039	0.909509	176.202	3.07722	176.342	3.15103	178.194	18.8622	176.202	3.07722
	EC1519_Spot 1	794.946	50603.6	1.12218	20.0966	0.814156	0.190283	2.07133	0.0277346	1.90462	0.919513	176.354	3.31335	176.871	3.36226	183.756	18.9832	176.354	3.31335
	EC1606_Spot 9	231.795	43607	2.31466	19.8272	1.27615	0.193057	2.94103	0.0277737	2.64974	0.900956	176.599	4.61591	179.234	4.83233	215.138	29.5659	176.599	4.61591
	EC1606_Spot 95	321.414	208313	2.04345	20.2779	1.17149	0.188769	2.47993	0.0277742	2.18579	0.881391	176.603	3.80777	175.579	3.99858	162.803	27.4144	176.603	3.80777
	EC1606_Spot 76	123.808	29135	2.6388	20.7701	1.24563	0.184749	2.46286	0.0278426	2.12464	0.862671	177.032	3.7101	172.139	3.89967	106.433	29.4359	177.032	3.7101
	EC1606_Spot 64	223.067	3471.24	2.5737	15.6496	3.70536	0.246177	6.29688	0.0279537	5.09126	0.808537	177.728	8.92502	223.466	12.6312	738.283	78.4576	177.728	8.92502
	EC1606_Spot 1	147.228	646818	1.71807	20.6061	1.44746	0.186963	3.14451	0.0279538	2.79156	0.887757	177.729	4.89364	174.035	5.02927	125.125	34.0737	177.729	4.89364
	EC1606_Spot 43	266.815	103256	1.77368	19.9748	1.37575	0.192993	3.29278	0.0279712	2.9916	0.908535	177.838	5.2475	179.18	5.40878	197.933	31.9615	177.838	5.2475
	EC1606_Spot 88	1118.34	97759.4	1.76209	19.8293	0.893421	0.19441	2.57992	0.0279713	2.42028	0.938124	177.839	4.24538	180.385	4.26387	214.871	20.6922	177.839	4.24538
	EC1519_Spot 9	237.844	2300.96	2.00857	17.5104	3.00879	0.220628	3.52787	0.0280192	1.84202	0.522133	178.139	3.23643	202.432	6.47478	495.737	66.319	178.139	3.23643
	EC1519_Spot 30	371.555	20494.6	1.67023	20.0918	1.1326	0.192449	2.0476	0.0280436	1.70584	0.833091	178.292	2.9997	178.717	3.35547	184.317	26.3676	178.292	2.9997
	EC1519_Spot 29	432.939	200506	1.40084	19.2571	1.3187	0.200916	2.51652	0.0280611	2.14334	0.851708	178.402	3.77133	185.901	4.27498	282.301	30.1716	178.402	3.77133
	EC1606_Spot 78	41.784	4033.62	2.8305	20.6472	2.36494	0.187523	3.83132	0.0280934	3.01432	0.786757	178.604	5.30981	174.514	6.14324	120.479	55.7374	178.604	5.30981
	EC1606_Spot 29	48.769	6237.14	2.02692	20.4927	2.22946	0.189147	3.56787	0.0281247	2.78554	0.780729	178.801	4.91214	175.901	5.76247	138.117	52.3706	178.801	4.91214
	EC1606_Spot 27	159.023	5173.83	2.29378	14.8059	3.34819	0.26221	3.91946	0.0281689	2.03759	0.519865	179.078	3.59867	236.446	8.26767	854.512	69.5866	179.078	3.59867
	EC1606_Spot 51	629.444	38052.9	1.65124	20.0166	0.93508	0.194067	2.18721	0.0281856	1.97724	0.904005	179.183	3.4941	180.093	3.60947	193.092	21.7506	179.183	3.4941
	EC1606_Spot 56	115.536	69433.3	2.74903	15.5402	1.91216	0.250183	3.60011	0.0282099	3.05031	0.847284	179.335	5.3949	226.725	7.31538	753.108	40.3726	179.335	5.3949
	EC1606_Spot 70	391.657	69093.5	1.46818	19.9954	1.10392	0.195006	3.24658	0.0282921	3.05314	0.940417	179.85	5.41519	180.892	5.37945	195.553	25.6575	179.85	5.41519
	EC1606_Spot 37	291.178	9261.15	2.31281	20.829	1.26675	0.187276	3.16759	0.0283034	2.90327	0.916555	179.921	5.15138	174.302	5.07334	99.7369	29.979	179.921	5.15138
	EC1606_Spot 104	449.878	21037.4	2.49256	19.8958	1.2477	0.196069	2.29487	0.0283047	1.92605	0.839285	179.929	3.41762	181.794	3.81983	207.112	28.9611	179.929	3.41762
	EC1606_Spot 80	490.505	117569	1.73989	19.8968	1.10319	0.196114	3.4386	0.0283126	3.25683	0.947138	179.979	5.78053	181.833	5.72468	206.988	25.5872	179.979	5.78053
	EC1606_Spot 109	265.786	85132.7	2.13903	20.0248	0.868002	0.195217	2.79577	0.0283644	2.65761	0.950583	180.304	4.72537	181.071	4.63664	192.129	20.1869	180.304	4.72537
	EC1606_Spot 63	449.421	32029.3	1.16324	19.6336	1.19104	0.199712	3.28232	0.0284507	3.0586	0.931841	180.844	5.45444	184.883	5.54807	237.807	27.4714	180.844	5.45444
	EC1519_Spot 26	780.545	12133.1	2.2502	20.3126	1.11845	0.193381	2.1952	0.0284892	1.88891	0.860472	181.086	3.37294	179.51	3.61194	158.796	26.1711	181.086	3.37294
	EC1606_Spot 55	171.17	74437.6	2.7994	20.6427	1.513	0.19124	3.60184	0.028644	3.26865	0.907495	182.056	5.86753	177.687	5.87137	120.953	35.6523	182.056	5.86753
	EC1606_Spot 93	219.747	18457.2	1.52977	20.9111	1.37537	0.188986	3.22173	0.0286744	2.91341	0.904298	182.247	5.23524	175.764	5.19969	90.4478	32.5943	182.247	5.23524
	EC1606_Spot 42	1716.3	75618.3	1.19999	19.9864	1.2579	0.19873	2.8622	0.0288194	2.57096	0.898248	183.155	4.64258	184.051	4.81809	196.602	29.2391	183.155	4.64258
	EC1606_Spot 11	286.843	17589.4	1.22057	20.6159	1.22083	0.192829	2.87683	0.0288445	2.60495	0.90549	183.312	4.70793	179.04	4.72218	124.008	28.7355	183.312	4.70793
	EC1606_Spot 35	109.313	12444.8	2.92689	20.7474	2.29201	0.193068	3.44667	0.0290644	2.57415	0.74685	184.69	4.68674	179.244	5.66343	109.038	54.1333	184.69	4.68674
	EC1519_Spot 17	244.497	29914.3	2.01073	17.6962	1.35867	0.226472	2.7038	0.0290666	2.33763	0.864575	184.704	4.25643	207.282	5.0695	472.414	30.0629	184.704	4.25643
	EC1606_Spot 72	320.014	107494	1.34871	20.0992	1.0984	0.199464	3.16695	0.0290891	2.97037	0.937927	184.845	5.4126	184.673	5.34752	183.461	25.5808	184.845	5.4126
	EC1606_Spot 16	106.194	4350.68	2.41891	21.0383	1.95579	0.191048	3.53624	0.0291635	2.94617	0.833135	185.311	5.38185	177.523	5.75957	76.0374	46.4648	185.311	5.38185
	EC1606_Spot 2	153.593	65175.6	2.75713	19.4671	1.5845	0.207472	2.66136	0.0293054	2.13827	0.80345	186.199	3.92449	191.429	4.6432	257.401	36.4318	186.199	3.92449
	EC1606_Spot 45	606.202	52003.4	1.22967	20.2465	1.1766	0.199503	2.63716	0.0293081	2.36013	0.894952	186.216	4.33208	184.705	4.45366	166.419	27.4929	186.216	4.33208
	EC1606_Spot 94	158.99	14004.3	2.08836	18.311	2.73407	0.220985	4.07741	0.0293604	3.02493	0.741874	186.544	5.56196	202.729	7.49333	396.354	61.3148	186.544	5.56196
	EC1519_Spot 32	876.305	90812.1	2.03717	19.5725	0.835836	0.212523	2.18767	0.0301684	2.0217	0.924135	191.602	3.81662	195.668	3.89341	244.96	19.2521	191.602	3.81662
	EC1606_Spot 30	357.295	2050.69	2.36604	11.3317	9.77903	0.368194	14.252	0.0302733	10.3677	0.727459	192.258	19.6386	318.314	38.9626	1387.87	188.155	192.258	19.6386
	EC1606_Spot 57	113	31584.8	2.6659	19.8057	2.02354	0.211586	3.87401	0.0304065	3.30352	0.852739	193.092	6.28423	194.883	6.86958	217.613	46.8608	193.092	6.28423
	EC1606_Spot 14	73.9867	5391.11	1.86296	21.1249	1.87536	0.223301	3.77477	0.0342274	3.27596	0.867857	216.952	6.98901	204.654	6.99657	66.2633	44.6349	216.952	6.98901
	EC1519_Spot 15	313.947	10695.3	3.30802	20.0405	1.28784	0.247462	2.28966	0.035968	1.89315	0.826826	227.792	4.23715	224.513	4.61196	190.309	29.9412	227.792	4.23715
	EC1606_Spot 25	328.758	42742.1	18.169	19.9677	1.05029	0.255509	2.97399	0.0370188	2.78236	0.935563	234.328	6.40275	231.042	6.14556	198.732	24.4154	234.328	6.40275
	EC1519_Spot 3	1257.45	27546.9	9.36255	19.7546	0.662688	0.262381	1.43052	0.0375923	1.26777	0.886228	237.892	2.96094	236.583	3.01902	223.606	15.3018	237.892	2.96094
	EC1519_Spot 10	71.5787	9350.62	1.96533	20.3399	1.91893	0.255227	3.68363	0.0376508	3.14433	0.853597	238.255	7.35478	230.814	7.60534	155.704	44.9447	238.255	7.35478
	EC1519_Spot 21	307.549	9136.31	7.15612	20.1426	1.65766	0.257995	2.61489	0.03769	2.02233	0.77339	238.499	4.73511	233.05	5.44529	178.427	38.6556	238.499	4.73511
	EC1519_Spot 14	791.693	12681.7	1.35151	19.7265	0.729787	0.289135	2.10119	0.0413665	1.97039	0.937747	261.298	5.04563	257.878	4.78521	226.913	16.8532	261.298	5.04563
	EC1519_Spot 7	1286.79	134763	1.59699	17.8768	0.699709	0.527678	1.72544	0.068416	1.5772	0.914084	426.605	6.51061	430.268	6.05163	449.904	15.5511	426.605	6.51061
	EC1606_Spot 106	75.9515	26241	1.42659	16.8125	1.31808	0.801369	3.6019	0.0977583	3.35206	0.930638	601.258	19.2432	597.6	16.2715	584.711	28.5913	601.258	19.2432
	EC1606_Spot 36	122.515	762311	3.61388	13.8547	0.835703	1.67115	2.67832	0.167997	2.5446	0.950074	1001.07	23.5939	997.624	17.0157	990.969	16.9956	990.969	16.9956
	EC1519_Spot 13	289.291	122193	1.45598	13.3823	0.612904	1.87938	2.10346	0.182408	2.01218	0.956608	1080.12	20.0108	1073.84	13.9414	1061.15	12.332	1061.15	12.332
	EC1519_Spot 31	224.228	78952.4	1.69866	12.2823	0.638412	2.27085	2.29738	0.202286	2.2069	0.960614	1187.59	23.9365	1203.28	16.1968	1231.58	12.5281	1231.58	12.5281
	EC1606_Spot 86	191.075	82855.5	2.88182	11.4242	0.990601	2.81257	3.36371	0.233141	3.21454	0.955653	1350.94	39.1786	1358.89	25.2014	1372.24	19.0581	1372.24	19.0581
	EC1606_Spot 83	85.4908	33974.6	3.33535	10.6367	1.08209	3.27053	3.20945	0.252415	3.02153	0.941449	1450.92	39.257	1474.07	24.9623	1508.37	20.4361	1508.37	20.4361
	EC1606_Spot 7	56.5489	35481	1.75131	10.6097	1.07225	3.39399	3.27749	0.261277	3.09713	0.94497	1496.37	41.3594	1503.01	25.7108	1513.19	20.2373	1513.19	20.2373
	EC1519_Spot 27	211.905	41196.3	1.64364	10.556	0.506144	3.62581	1.83117	0.277591	1.75983	0.961041	1579.22	24.6492	1555.21	14.5749	1522.74	9.53969	1522.74	9.53969
	EC1606_Spot 67	25.7744	60776	12.6685	10.14	1.38205	3.91321	3.14451	0.287911	2.82451	0.898236	1631.08	40.7041	1616.42	25.4355	1598.17	25.7941	1598.17	25.7941
	EC1606_Spot 103	109.87	227618	2.35772	9.86667	0.941593	4.12397	3.07236	0.295239	2.92452	0.95188	1667.66	42.9737	1659.06	25.1131	1648.99	17.4587	1648.99	17.4587
	EC1606_Spot 97	304.739	136312	4.91225	9.83119	0.808787	3.89751	2.83125	0.278023	2.71327	0.95833	1581.4	38.0504	1613.17	22.882	1655.67	14.9831	1655.67	14.9831
	EC1606_Spot 62	60.6044	85999.7	1.74563	8.76732	0.997234	5.27062	3.0638	0.335287	2.89696	0.945546	1863.95	46.8932	1864.12	26.1539	1865.07	18.0002	1865.07	18.0002
	EC1606_Spot 81	169.579	588117	2.441	8.66397	0.849409	5.3157	2.44596	0.334168	2.29373	0.937765	1858.55	37.0357	1871.39	20.9064	1886.44	15.2922	1886.44	15.2922
	EC1519_Spot 24	179.683	42566.4	1.99348	8.15724	2.03723	5.77238	6.17318	0.341505	5.82734	0.943977	1893.91	95.6368	1942.28	53.4753	1994.25	36.2172	1994.25	36.2172
	EC1519_Spot 33	130.176	60408.8	2.87925	7.79106	0.671579	6.58272	2.75581	0.371963	2.67273	0.969852	2038.63	46.713	2057.04	24.2964	2075.51	11.8264	2075.51	11.8264
15	EC1601
	EC1601a_Spot 35	320.781	36117.5	1.24842	20.5478	1.67413	0.0384507	1.93086	0.00573267	0.962033	0.498242	36.8496	0.353494	38.3103	0.725936	131.838	39.3565	36.8496	0.353494
	EC1601a_Spot 85	225.923	26533.1	1.28091	21.6436	1.67983	0.0389371	2.15796	0.00611478	1.35461	0.627729	39.2984	0.530722	38.7858	0.821198	8.20396	40.4071	39.2984	0.530722
	EC1601b_Spot 102	120.319	30077.5	2.46566	13.9391	7.31351	0.0639514	8.41158	0.00646806	4.1554	0.49401	41.5615	1.72149	62.9433	5.13381	978.58	149.187	41.5615	1.72149
	EC1601b_Spot 23	135.504	5230.22	2.28327	21.9847	3.18904	0.0427476	3.86151	0.006819	2.17744	0.563884	43.8089	0.950679	42.5031	1.60738	NA	NA	43.8089	0.950679
	EC1601a_Spot 95	69.8406	5122.35	3.3538	21.5181	3.59298	0.076634	3.70554	0.011965	0.906387	0.244603	76.6738	0.690844	74.9754	2.67816	22.2012	86.2545	76.6738	0.690844
	EC1601a_Spot 76	246.732	17300.2	2.70672	20.9064	1.13936	0.0809624	1.63076	0.0122815	1.16672	0.715448	78.6894	0.912508	79.0494	1.2402	90.953	26.9984	78.6894	0.912508
	EC1601b_Spot 44	315.246	98915.8	1.97192	18.9159	2.40921	0.131236	3.97764	0.0180123	3.16502	0.795703	115.082	3.61003	125.208	4.68554	323.052	54.7266	115.082	3.61003
	EC1601a_Spot 26	88.6935	18436.3	4.04554	21.0347	1.40406	0.123537	1.8654	0.0188548	1.22813	0.658376	120.414	1.46512	118.274	2.08263	76.4363	33.3671	120.414	1.46512
	EC1601a_Spot 77	281.136	28725.9	2.22473	20.7602	1.22065	0.137411	1.60169	0.0206986	1.03703	0.647456	132.07	1.35566	130.735	1.96478	107.607	28.835	132.07	1.35566
	EC1601a_Spot 59	128.735	103567	2.94738	20.1222	1.14349	0.142377	1.48092	0.0207876	0.941039	0.635444	132.632	1.23536	135.159	1.87409	180.789	26.671	132.632	1.23536
	EC1601a_Spot 22	170.732	22509.9	2.11256	20.3873	1.09795	0.142793	1.45869	0.0211229	0.960347	0.658365	134.749	1.28062	135.528	1.85068	150.205	25.7316	134.749	1.28062
	EC1601a_Spot 92	169.884	4253.56	1.98408	13.1552	3.28685	0.22385	3.50981	0.021367	1.23099	0.35073	136.289	1.6601	205.109	6.51852	1095.5	65.8157	136.289	1.6601
	EC1601a_Spot 55	53.019	9390.49	2.57201	20.9086	2.03365	0.14094	2.37736	0.021382	1.2313	0.517929	136.384	1.66166	133.881	2.98194	90.7429	48.1984	136.384	1.66166
	EC1601a_Spot 6	134.314	15302.7	2.58663	20.8202	1.31272	0.143608	1.61402	0.0216946	0.939048	0.581807	138.357	1.2854	136.253	2.05798	100.757	31.058	138.357	1.2854
	EC1601a_Spot 90	119.852	100621	1.98665	20.2939	1.51386	0.148507	1.79817	0.0218675	0.970386	0.53965	139.448	1.33865	140.592	2.36088	160.969	35.4326	139.448	1.33865
	EC1601b_Spot 32	222.572	16168.5	1.69746	21.0364	1.80729	0.144231	3.06707	0.022015	2.47803	0.807946	140.378	3.44101	136.806	3.92556	76.245	42.9637	140.378	3.44101
	EC1601a_Spot 10	510.702	96816.7	2.56848	20.542	0.830409	0.14791	1.23976	0.0220459	0.920554	0.742527	140.573	1.28004	140.065	1.62202	132.479	19.5066	140.573	1.28004
	EC1601b_Spot 97	280.93	17067.3	3.3304	20.555	1.63671	0.148239	3.97684	0.022109	3.62442	0.911382	140.971	5.05392	140.356	5.21318	131.016	38.4899	140.971	5.05392
	EC1601b_Spot 10	165.354	64835.8	2.24782	20.0025	1.29005	0.152603	3.74832	0.022148	3.51933	0.938909	141.217	4.91587	144.208	5.03912	194.73	29.9987	141.217	4.91587
	EC1601b_Spot 95	414.422	85998.3	1.46693	19.9235	1.06182	0.157411	3.50866	0.0227556	3.34414	0.953109	145.048	4.79643	148.434	4.84532	203.874	24.6413	145.048	4.79643
	EC1601a_Spot 54	69.4701	20764.7	1.70744	20.5886	1.65087	0.154532	2.05538	0.0230851	1.22443	0.595721	147.124	1.78103	145.905	2.79341	127.18	38.8338	147.124	1.78103
	EC1601b_Spot 60	88.8684	11191.6	1.87816	21.2887	2.11115	0.149687	4.1431	0.0231218	3.56487	0.860436	147.356	5.19346	141.636	5.47727	47.8773	50.4207	147.356	5.19346
	EC1601b_Spot 40	69.9811	6193.69	2.00981	21.6948	2.18143	0.146894	4.13507	0.0231232	3.51286	0.849528	147.364	5.11798	139.166	5.37772	2.54225	52.5492	147.364	5.11798
	EC1601a_Spot 23	415.632	91545.7	7.17051	20.3552	0.787306	0.158207	1.41471	0.0233662	1.17539	0.830838	148.895	1.73005	149.132	1.96217	153.94	18.439	148.895	1.73005
	EC1601a_Spot 56	148.547	47097.8	2.15927	20.0018	1.21026	0.161552	1.57007	0.023446	1.00019	0.637034	149.398	1.47708	152.06	2.21728	194.802	28.1464	149.398	1.47708
	EC1601a_Spot 27	187.843	33160.4	1.99822	19.8372	1.08743	0.163081	1.45282	0.0234732	0.963417	0.663137	149.569	1.42439	153.397	2.06841	213.98	25.2118	149.569	1.42439
	EC1601a_Spot 70	171.622	28800.7	1.50564	20.5364	0.962556	0.157684	1.40857	0.0234963	1.02838	0.730085	149.715	1.52189	148.673	1.94807	133.116	22.6152	149.715	1.52189
	EC1601a_Spot 16	195.94	379689	1.75608	20.2958	1.09639	0.159714	1.52584	0.02352	1.06118	0.695474	149.864	1.57199	150.453	2.13369	160.741	25.6366	149.864	1.57199
	EC1601a_Spot 32	119.437	62455.8	2.45398	15.7915	2.47407	0.205349	2.82193	0.023529	1.3573	0.480983	149.921	2.01139	189.642	4.88156	719.152	52.5187	149.921	2.01139
	EC1601a_Spot 24	338.783	111184	1.81514	19.951	0.991292	0.162608	1.43863	0.0235393	1.0426	0.724713	149.986	1.5457	152.983	2.0431	200.702	23.0183	149.986	1.5457
	EC1601b_Spot 120	122.399	12619.5	2.17066	20.7489	1.43336	0.156498	3.57219	0.0235609	3.27201	0.915966	150.122	4.85524	147.633	4.90832	108.864	33.8389	150.122	4.85524
	EC1601b_Spot 2	103.55	24425	1.62224	20.6609	1.68057	0.157415	3.35237	0.0235985	2.9007	0.865268	150.358	4.31097	148.438	4.62958	118.872	39.6171	150.358	4.31097
	EC1601b_Spot 55	180.957	56382.9	2.44848	20.3228	1.24131	0.16012	3.75733	0.0236112	3.54636	0.943851	150.438	5.27331	150.808	5.2657	157.643	29.0292	150.438	5.27331
	EC1601b_Spot 108	217.758	25932.6	1.46645	20.4325	1.66459	0.159371	3.44964	0.0236275	3.02145	0.875874	150.541	4.49583	150.152	4.81497	145.018	39.0508	150.541	4.49583
	EC1601a_Spot 67	210.821	20720.3	1.67527	20.5605	0.915728	0.158631	1.46372	0.0236651	1.14189	0.780129	150.778	1.70174	149.504	2.03484	130.361	21.5446	150.778	1.70174
	EC1601a_Spot 62	275.62	78488.1	1.69001	20.1209	0.938193	0.162268	1.27366	0.0236902	0.861393	0.676314	150.936	1.28505	152.687	1.80555	180.948	21.8642	150.936	1.28505
	EC1601b_Spot 39	83.6081	11919	2.15465	20.9849	1.96533	0.155977	4.69942	0.0237495	4.26873	0.908352	151.31	6.38378	147.176	6.4386	82.0698	46.672	151.31	6.38378
	EC1601b_Spot 78	144.549	110902	2.49624	19.9869	1.78711	0.163982	4.11435	0.023781	3.70596	0.90074	151.508	5.54935	154.183	5.88555	196.542	41.5182	151.508	5.54935
	EC1601a_Spot 88	77.1033	97692.1	1.69121	20.1976	1.40452	0.16234	1.82324	0.023791	1.16255	0.637631	151.571	1.74153	152.75	2.58564	172.077	32.7906	151.571	1.74153
	EC1601b_Spot 77	218.457	25095.9	7.30009	20.3558	1.79568	0.161269	4.34353	0.0238192	3.95497	0.910543	151.748	5.93151	151.813	6.12486	153.844	42.0689	151.748	5.93151
	EC1601b_Spot 4	253.142	38518.1	1.51425	20.0021	1.71819	0.164326	4.192	0.023849	3.8237	0.912142	151.936	5.74164	154.483	6.00743	194.773	39.9414	151.936	5.74164
	EC1601b_Spot 26	81.1464	17839.1	2.38498	20.1558	2.31229	0.163177	3.47909	0.0238642	2.5995	0.747179	152.031	3.90583	153.48	4.95578	176.9	53.9307	152.031	3.90583
	EC1601a_Spot 53	310.07	51043.9	1.27633	20.6989	0.999176	0.159085	1.54382	0.0238927	1.17687	0.76231	152.211	1.77034	149.902	2.1515	114.544	23.5797	152.211	1.77034
	EC1601b_Spot 105	86.9344	13510.4	1.94656	20.6603	1.63719	0.159393	3.94408	0.0238942	3.58823	0.909775	152.221	5.39804	150.171	5.50577	118.939	38.6106	152.221	5.39804
	EC1601a_Spot 25	73.1871	16285.6	2.09432	20.4623	1.30254	0.161481	1.65938	0.0239753	1.02807	0.61955	152.731	1.55173	151.999	2.34253	141.589	30.5757	152.731	1.55173
	EC1601a_Spot 79	212.965	129471	2.55999	20.1467	0.92624	0.164142	1.34268	0.0239944	0.972044	0.723958	152.851	1.46831	154.322	1.92228	177.962	21.5871	152.851	1.46831
	EC1601b_Spot 46	255.142	145030	2.64408	20.2457	1.87662	0.163384	4.15472	0.024001	3.70676	0.892179	152.893	5.60069	153.661	5.92464	166.512	43.8603	152.893	5.60069
	EC1601b_Spot 50	95.7902	6360.77	2.28771	21.2468	1.83571	0.155735	4.18739	0.0240086	3.76356	0.898785	152.941	5.68828	146.963	5.72936	52.5878	43.7908	152.941	5.68828
	EC1601b_Spot 101	99.8881	11974.4	1.5613	20.6444	2.4797	0.160433	3.92608	0.0240318	3.04387	0.775295	153.086	4.60486	151.082	5.51147	120.752	58.4335	153.086	4.60486
	EC1601b_Spot 20	1374.04	651028	18.5225	20.0389	1.24471	0.165312	4.28789	0.0240363	4.10325	0.956941	153.115	6.20868	155.343	6.17649	190.492	28.943	153.115	6.20868
	EC1601b_Spot 31	143.43	84094.4	2.77094	19.7894	1.86289	0.167626	4.55595	0.0240692	4.15768	0.912583	153.322	6.29944	157.356	6.64128	219.52	43.1139	153.322	6.29944
	EC1601a_Spot 15	118.55	55672.5	1.90015	20.4618	0.921762	0.16228	1.32566	0.0240933	0.952746	0.718696	153.474	1.44495	152.697	1.87939	141.677	21.6239	153.474	1.44495
	EC1601b_Spot 87	492.677	37452.7	2.43913	20.0478	1.21951	0.165836	3.56227	0.0241231	3.34702	0.939575	153.661	5.08227	155.799	5.14521	189.424	28.3739	153.661	5.08227
	EC1601a_Spot 87	136.692	67874	2.28071	20.4149	1.30538	0.163213	1.77578	0.0241764	1.2039	0.677956	153.997	1.832	153.512	2.52997	147.075	30.6116	153.997	1.832
	EC1601a_Spot 49	93.3959	327209	1.85444	18.4812	1.95581	0.180916	2.19957	0.0242602	1.00644	0.457562	154.525	1.53671	168.848	3.42159	375.57	44.0087	154.525	1.53671
	EC1601b_Spot 74	112.436	12253.3	1.59367	21.0548	1.47312	0.160157	3.55211	0.0244672	3.23225	0.909951	155.827	4.97632	150.84	4.97907	74.1944	34.9959	155.827	4.97632
	EC1601b_Spot 45	134.494	55253.4	1.65587	20.4382	1.35137	0.183749	3.63157	0.0272494	3.37078	0.928186	173.31	5.76407	171.282	5.72394	144.353	31.7016	173.31	5.76407
	EC1601a_Spot 11	706.009	5.22789e+07	1.40826	19.9604	0.873399	0.188362	1.28547	0.0272803	0.943189	0.733731	173.504	1.61464	175.231	2.06889	199.593	20.3066	173.504	1.61464
	EC1601a_Spot 65	167.636	164167	2.52997	19.6005	1.00012	0.192421	1.32857	0.0273658	0.874559	0.658271	174.041	1.50173	178.693	2.1769	241.688	23.0584	174.041	1.50173
	EC1601b_Spot 111	929.4	2.41629e+06	1.30829	19.5885	1.25856	0.192602	3.40932	0.0273746	3.16851	0.929369	174.096	5.44243	178.847	5.5907	243.131	28.9771	174.096	5.44243
	EC1601b_Spot 84	693.13	22897.9	0.795325	17.557	2.16795	0.215345	4.21106	0.027433	3.61013	0.857297	174.462	6.21385	198.028	7.57642	489.89	47.8377	174.462	6.21385
	EC1601b_Spot 9	178.093	28521.8	1.54268	18.2469	3.01291	0.207383	4.85186	0.0274569	3.80302	0.783827	174.612	6.55142	191.355	8.46208	404.202	67.4845	174.612	6.55142
	EC1601a_Spot 84	1487.35	112072	0.953185	19.8794	0.669794	0.190935	1.31951	0.0275408	1.13687	0.861588	175.138	1.9643	177.427	2.14803	209.042	15.5102	175.138	1.9643
	EC1601b_Spot 114	87.2293	114336	3.31206	19.1923	1.86424	0.197944	3.33109	0.0275649	2.76057	0.828729	175.29	4.77379	183.385	5.58889	289.991	42.5928	175.29	4.77379
	EC1601b_Spot 5	333.097	36330	2.52535	19.8944	1.14829	0.191078	3.38057	0.0275823	3.17958	0.940544	175.399	5.50176	177.549	5.50675	207.256	26.6543	175.399	5.50176
	EC1601b_Spot 7	681.422	198306	1.3853	19.7444	1.53657	0.192797	3.48081	0.0276205	3.1233	0.89729	175.638	5.41166	179.013	5.71279	224.807	35.5465	175.638	5.41166
	EC1601b_Spot 53	230.336	46981.1	3.19545	19.6579	1.21367	0.193757	3.24444	0.0276365	3.00888	0.927398	175.739	5.21636	179.83	5.34706	234.966	28.0255	175.739	5.21636
	EC1601b_Spot 69	130.02	35963.6	1.77213	19.9498	1.24456	0.190926	2.81776	0.027637	2.52801	0.897171	175.742	4.38277	177.419	4.58687	200.85	28.8989	175.742	4.38277
	EC1601b_Spot 24	348.3	49918.3	2.15761	20.0093	1.33437	0.190535	3.51215	0.0276627	3.2488	0.925016	175.903	5.63748	177.085	5.70742	193.932	31.0235	175.903	5.63748
	EC1601b_Spot 19	975.152	72373.3	1.11754	19.739	1.22354	0.193267	3.4565	0.0276804	3.2327	0.935252	176.014	5.61303	179.413	5.6845	225.419	28.2738	176.014	5.61303
	EC1601b_Spot 28	304.264	111479	3.28568	19.8834	1.31877	0.192197	3.26313	0.0277285	2.98478	0.914696	176.316	5.19132	178.502	5.34156	208.57	30.6013	176.316	5.19132
	EC1601a_Spot 60	146.697	85949.2	1.43603	20.1854	1.02636	0.189451	1.55809	0.0277474	1.17227	0.752379	176.434	2.04024	176.161	2.51984	173.481	23.9284	176.434	2.04024
	EC1601b_Spot 115	402.355	90084.4	1.5216	19.7003	1.19146	0.194346	3.33258	0.0277802	3.11232	0.933906	176.64	5.42297	180.331	5.50631	229.959	27.5087	176.64	5.42297
	EC1601a_Spot 20	242.421	54776.7	3.31507	20.4658	0.937042	0.187691	1.52605	0.0278715	1.20449	0.789283	177.213	2.10543	174.657	2.44872	141.204	21.975	177.213	2.10543
	EC1601a_Spot 75	219.288	285748	1.38017	20.2416	0.940282	0.18978	1.41589	0.0278729	1.05859	0.747651	177.222	1.85051	176.441	2.29321	166.989	21.9684	177.222	1.85051
	EC1601b_Spot 86	273.202	88344.5	2.56752	20.052	1.29238	0.191632	3.40417	0.0278814	3.14931	0.925132	177.275	5.50687	178.021	5.55868	188.927	30.0652	177.275	5.50687
	EC1601a_Spot 1	221.304	52556	2.55059	17.6312	1.82632	0.21811	2.08273	0.0279027	1.00115	0.480693	177.408	1.75191	200.336	3.78663	480.549	40.3552	177.408	1.75191
	EC1601a_Spot 69	709.545	105124	1.2757	20.1543	0.80188	0.190805	1.31484	0.0279027	1.04202	0.792503	177.409	1.82342	177.316	2.13921	177.075	18.721	177.409	1.82342
	EC1601b_Spot 73	468.69	74761.2	1.60128	20.261	1.38482	0.18987	3.42641	0.0279129	3.13409	0.914688	177.473	5.48629	176.518	5.55175	164.748	32.3843	177.473	5.48629
	EC1601a_Spot 63	180.891	23151.4	1.62257	20.6446	1.0551	0.186386	1.37861	0.0279195	0.887319	0.643634	177.514	1.55363	173.541	2.19917	120.738	24.8773	177.514	1.55363
	EC1601b_Spot 14	1626.76	108340	1.02812	19.0939	1.16016	0.201697	3.16054	0.0279436	2.93991	0.93019	177.665	5.15186	186.561	5.38641	301.735	26.4524	177.665	5.15186
	EC1601a_Spot 41	209.725	114894	1.69875	20.4524	1.01307	0.188315	1.4104	0.0279458	0.98128	0.695748	177.679	1.71972	175.19	2.26947	142.726	23.7749	177.679	1.71972
	EC1601b_Spot 70	123.557	13311.3	1.96362	20.0322	1.96234	0.192389	3.90062	0.0279639	3.37107	0.864238	177.792	5.9116	178.666	6.39047	191.277	45.6335	177.792	5.9116
	EC1601a_Spot 21	225.117	110954	1.49373	20.4725	0.873464	0.188405	1.44291	0.0279866	1.14849	0.795959	177.935	2.01562	175.267	2.32272	140.446	20.5006	177.935	2.01562
	EC1601a_Spot 39	71.4381	20594.8	2.12892	19.838	1.48432	0.194487	2.00424	0.0279947	1.34677	0.67196	177.986	2.36427	180.45	3.31353	213.885	34.3848	177.986	2.36427
	EC1601b_Spot 93	74.3118	12224.3	2.84149	20.0814	1.74186	0.192338	4.05422	0.028025	3.66096	0.903	178.175	6.43361	178.622	6.64061	185.525	40.5774	178.175	6.43361
	EC1601b_Spot 35	267.093	84286.4	2.63919	20.1222	1.2653	0.192043	3.50396	0.0280389	3.26753	0.932525	178.263	5.74499	178.371	5.73192	180.796	29.4928	178.263	5.74499
	EC1601b_Spot 11	471.142	251331	2.43173	20.236	1.28712	0.191097	3.23815	0.0280585	2.97136	0.917609	178.386	5.22782	177.564	5.27518	167.636	30.0895	178.386	5.22782
	EC1601b_Spot 67	352.891	49555.9	7.21002	19.9248	1.30591	0.194886	3.82578	0.0281748	3.596	0.939938	179.115	6.35232	180.79	6.33591	203.721	30.3297	179.115	6.35232
	EC1601b_Spot 65	183.733	67532.6	1.88471	20.276	1.50115	0.192239	3.24254	0.0282822	2.87412	0.886382	179.788	5.09594	178.538	5.30881	163.018	35.0771	179.788	5.09594
	EC1601b_Spot 90	210.306	26929.7	1.96959	20.2376	1.67307	0.192677	3.41724	0.0282928	2.97965	0.871948	179.855	5.28498	178.911	5.60552	167.449	39.0802	179.855	5.28498
	EC1601b_Spot 106	114.24	15197	1.79547	19.6958	2.2907	0.198392	3.92712	0.0283522	3.18983	0.812255	180.227	5.6693	183.765	6.6014	230.478	52.9293	180.227	5.6693
	EC1601b_Spot 17	124.075	67292.8	2.55978	20.7658	2.09162	0.188224	3.80497	0.0283604	3.17851	0.835357	180.279	5.65079	175.113	6.12018	106.967	49.4348	180.279	5.65079
	EC1601a_Spot 37	65.1267	14999.3	2.16144	19.9939	1.60756	0.196242	2.01042	0.0284692	1.20728	0.600514	180.961	2.15433	181.941	3.34881	195.729	37.3694	180.961	2.15433
	EC1601b_Spot 47	282.587	207266	2.74595	20.3858	1.67193	0.192522	3.35966	0.0284772	2.91411	0.86738	181.01	5.20146	178.779	5.50737	150.374	39.1616	181.01	5.20146
	EC1601b_Spot 85	664.423	86827.5	1.79874	20.1628	1.35278	0.194698	4.59358	0.0284839	4.38987	0.955653	181.052	7.8374	180.63	7.60137	176.094	31.5641	181.052	7.8374
	EC1601a_Spot 99	148.159	37099.3	1.49947	20.4661	1.26721	0.191839	1.56523	0.0284879	0.918757	0.586979	181.078	1.64052	178.197	2.55816	141.184	29.7335	181.078	1.64052
	EC1601b_Spot 62	169.029	42594	2.54978	19.9484	1.48753	0.196881	4.71036	0.0284969	4.46931	0.948826	181.134	7.98278	182.483	7.86765	200.977	34.562	181.134	7.98278
	EC1601b_Spot 66	187.623	297688	2.67541	20.0826	1.25385	0.196313	4.49105	0.028606	4.31248	0.960237	181.818	7.73132	182.002	7.48325	185.378	29.187	181.818	7.73132
	EC1601b_Spot 30	260.636	508429	1.47119	19.9018	1.7041	0.198894	3.50189	0.0287211	3.05929	0.873612	182.539	5.50608	184.19	5.89899	206.401	39.5463	182.539	5.50608
	EC1601b_Spot 116	91.6831	37810.8	2.2967	20.4384	1.91269	0.195352	4.05212	0.0289703	3.5723	0.881587	184.101	6.4836	181.186	6.7242	144.331	44.8769	184.101	6.4836
	EC1601a_Spot 36	80.6338	9654.16	2.20795	17.9827	2.12558	0.222185	2.43906	0.0289905	1.19623	0.490445	184.227	2.17258	203.726	4.50229	436.774	47.3469	184.227	2.17258
	EC1601a_Spot 30	174.433	101114	1.85112	20.1606	1.0442	0.19827	1.63062	0.0290035	1.25243	0.768067	184.308	2.27564	183.662	2.7396	176.345	24.3367	184.308	2.27564
	EC1601a_Spot 91	158.291	121320	2.16831	19.9133	0.932361	0.201229	1.49639	0.0290751	1.17042	0.782164	184.757	2.13175	186.165	2.54531	205.055	21.6417	184.757	2.13175
	EC1601a_Spot 93	108.44	292193	2.01007	20.0097	1.18117	0.200735	1.52292	0.0291441	0.961313	0.631229	185.189	1.75492	185.748	2.58514	193.894	27.4618	185.189	1.75492
	EC1601a_Spot 58	144.096	939827	1.56373	20.1326	1.07175	0.200462	1.48968	0.0292833	1.03465	0.694545	186.061	1.89757	185.517	2.52585	179.583	24.9828	186.061	1.89757
	EC1601b_Spot 51	163.159	354095	2.44277	20.0791	1.84071	0.201126	3.74556	0.0293022	3.26206	0.870913	186.18	5.98642	186.078	6.36842	185.787	42.8468	186.18	5.98642
	EC1601b_Spot 75	210.885	4.36621e+06	1.53479	19.5927	1.45293	0.206678	3.37713	0.0293817	3.04861	0.902722	186.677	5.60945	190.761	5.87334	242.583	33.4643	186.677	5.60945
	EC1601a_Spot 17	333.816	75703.7	1.61795	19.0741	1.2444	0.213056	1.94709	0.0294867	1.49754	0.769117	187.335	2.76505	196.114	3.47241	304.066	28.361	187.335	2.76505
	EC1601a_Spot 61	159.94	18439	1.21398	19.7007	1.34646	0.206573	1.71903	0.0295287	1.0687	0.621688	187.598	1.97597	190.673	2.98837	229.902	31.1093	187.598	1.97597
	EC1601a_Spot 57	173.309	58231.5	1.82511	19.6818	0.988848	0.207344	1.41279	0.0296105	1.00904	0.714217	188.11	1.87068	191.322	2.4636	232.123	22.8131	188.11	1.87068
	EC1601a_Spot 40	194.144	61152.8	1.76457	20.2603	1.02196	0.201603	1.51541	0.0296366	1.11896	0.738387	188.274	2.07624	186.481	2.58164	164.836	23.8681	188.274	2.07624
	EC1601b_Spot 57	254.143	27748.1	1.34802	20.2305	1.51925	0.202481	3.52916	0.0297221	3.18541	0.902597	188.809	5.9271	187.223	6.0341	168.27	35.4655	188.809	5.9271
	EC1601b_Spot 41	163.719	85743.5	1.95755	19.8769	1.47605	0.208341	3.31346	0.0300478	2.96653	0.895297	190.847	5.57856	192.16	5.80099	209.311	34.23	190.847	5.57856
	EC1601a_Spot 45	522.278	125832	5.18455	19.512	0.898872	0.214617	1.5616	0.0303847	1.27696	0.817724	192.955	2.42745	197.42	2.80173	252.134	20.6786	192.955	2.42745
	EC1601b_Spot 18	415.401	104308	2.62713	19.744	1.45538	0.227063	4.18325	0.032529	3.92192	0.937529	206.357	7.965	207.771	7.86018	224.842	33.6347	206.357	7.965
	EC1601a_Spot 33	298.695	111489	2.42095	19.7195	0.755819	0.233573	1.19758	0.0334199	0.928945	0.775684	211.917	1.93659	213.144	2.30247	227.74	17.4571	211.917	1.93659
	EC1601b_Spot 68	34.3575	2425.72	1.74111	21.3143	2.34552	0.216593	3.99518	0.0334968	3.23419	0.809524	212.396	6.75737	199.07	7.22225	44.9788	56.0416	212.396	6.75737
	EC1601a_Spot 19	157.277	105704	2.49808	19.9798	0.754109	0.232805	1.43588	0.0337499	1.22191	0.850985	213.975	2.57167	212.512	2.75326	197.331	17.5232	213.975	2.57167
	EC1601b_Spot 72	102.604	92159.1	2.23079	19.693	1.34942	0.240803	3.02114	0.0344081	2.70302	0.894705	218.078	5.79611	219.077	5.95338	230.813	31.1574	218.078	5.79611
	EC1601b_Spot 42	45.6397	48609.3	1.46563	19.6195	2.10222	0.245255	4.59282	0.0349134	4.08346	0.889097	221.226	8.88045	222.714	9.18503	239.47	48.4519	221.226	8.88045
	EC1601b_Spot 109	136.008	12377.1	2.57448	19.8605	1.45941	0.243072	3.18321	0.0350278	2.82895	0.888709	221.939	6.1717	220.933	6.32033	211.23	33.8359	221.939	6.1717
	EC1601b_Spot 81	302.672	782422	12.3697	19.5426	1.32585	0.249797	2.99633	0.0354206	2.68703	0.896773	224.385	5.92556	226.411	6.08096	248.533	30.5203	224.385	5.92556
	EC1601a_Spot 28	654.151	854817	10.6398	19.8354	0.595075	0.248336	1.17196	0.0357411	1.00964	0.861498	226.38	2.24596	225.223	2.36729	214.187	13.7699	226.38	2.24596
	EC1601a_Spot 73	1515.15	341756	126.384	19.586	0.645166	0.25275	0.89623	0.035919	0.622085	0.694113	227.487	1.39048	228.808	1.83602	243.426	14.8741	227.487	1.39048
	EC1601b_Spot 36	25.02	6805.66	4.0047	20.8249	2.30727	0.238555	4.60654	0.0360463	3.98707	0.865524	228.279	8.94239	217.237	9.00927	100.225	54.584	228.279	8.94239
	EC1601a_Spot 68	365.285	105541	9.66123	19.534	0.66315	0.255421	1.4273	0.0362023	1.26388	0.88551	229.25	2.84654	230.971	2.94858	249.527	15.2508	229.25	2.84654
	EC1601a_Spot 42	71.1018	63780.2	4.49649	18.7031	1.34385	0.268102	1.76034	0.0363833	1.13704	0.645921	230.376	2.57321	241.175	3.77897	348.689	30.3855	230.376	2.57321
	EC1601b_Spot 119	476.012	171876	11.2979	19.7174	1.30171	0.254588	2.93729	0.036423	2.63309	0.896438	230.623	5.96518	230.297	6.05227	227.967	30.0933	230.623	5.96518
	EC1601b_Spot 13	204.886	62364.1	6.84895	19.3283	1.18289	0.25977	3.24088	0.0364311	3.0173	0.931011	230.673	6.83704	234.482	6.78575	273.804	27.1055	230.673	6.83704
	EC1601b_Spot 52	578.576	344987	1.33831	19.6696	1.36131	0.255772	3.2326	0.0365037	2.93198	0.907005	231.125	6.65649	231.254	6.68544	233.597	31.4214	231.125	6.65649
	EC1601b_Spot 96	186.428	59672	13.5078	19.8438	1.4343	0.254693	4.24633	0.0366716	3.99676	0.941227	232.169	9.11413	230.382	8.75254	213.167	33.2298	232.169	9.11413
	EC1601a_Spot 43	71.0854	13465.3	7.58634	19.5684	1.32109	0.259412	1.60125	0.0368327	0.904835	0.56508	233.17	2.07211	234.193	3.34899	245.467	30.4183	233.17	2.07211
	EC1601b_Spot 8	281.413	31313.8	12.2826	19.6011	1.32594	0.25921	3.56426	0.0368654	3.30845	0.928229	233.374	7.58296	234.03	7.45006	241.649	30.5539	233.374	7.58296
	EC1601b_Spot 15	235.609	31188.1	5.51916	20.3387	1.63549	0.250383	3.08621	0.0369501	2.61722	0.848039	233.901	6.01198	226.888	6.27513	155.807	38.3116	233.901	6.01198
	EC1601b_Spot 29	262.023	74945.8	7.58679	19.7516	1.42304	0.257863	3.66694	0.0369555	3.37955	0.921629	233.934	7.7642	232.943	7.63302	223.979	32.8926	233.934	7.7642
	EC1601b_Spot 61	446.942	485694	15.6835	19.3357	1.45255	0.264119	4.33615	0.037055	4.08562	0.942223	234.553	9.41069	237.981	9.19936	272.934	33.3039	234.553	9.41069
	EC1601a_Spot 89	55.8098	15414.5	2.52209	19.7711	1.41209	0.259071	1.94043	0.0371653	1.33089	0.685872	235.238	3.07432	233.918	4.05414	221.705	32.665	235.238	3.07432
	EC1601b_Spot 49	108.498	24476	5.02829	19.5954	1.59672	0.261431	3.70267	0.0371705	3.3407	0.90224	235.27	7.71799	235.819	7.79197	242.279	36.814	235.27	7.71799
	EC1601b_Spot 117	265.576	128747	16.4186	19.7845	1.43385	0.25905	3.96003	0.0371874	3.69133	0.932147	235.376	8.53178	233.901	8.27328	220.094	33.1857	235.376	8.53178
	EC1601b_Spot 71	176.003	35093	3.62116	19.9278	1.61107	0.258055	3.41835	0.037313	3.01489	0.881972	236.156	6.99101	233.098	7.11977	203.4	37.4147	236.156	6.99101
	EC1601a_Spot 44	244.107	78562	7.79692	18.5906	1.1182	0.282519	1.57216	0.0381092	1.10514	0.70294	241.102	2.6153	252.654	3.51653	362.268	25.2128	241.102	2.6153
	EC1601b_Spot 103	185.809	45225.9	14.8982	20.0573	1.52281	0.262312	3.81642	0.0381749	3.49945	0.916944	241.51	8.29517	236.528	8.0528	188.318	35.4537	241.51	8.29517
	EC1601a_Spot 64	767.828	192348	1.43654	19.2096	0.645747	0.275994	2.24217	0.0384687	2.14717	0.95763	243.334	5.12742	247.475	4.9244	287.923	14.7617	243.334	5.12742
	EC1601a_Spot 2	185.052	40769	1.34252	19.5169	1.06981	0.277339	1.59216	0.0392744	1.17919	0.74062	248.334	2.87264	248.544	3.51013	251.554	24.6138	248.334	2.87264
	EC1601b_Spot 113	210.446	66208.5	1.86918	19.5131	1.39319	0.283775	3.59396	0.040178	3.31294	0.921807	253.936	8.2492	253.647	8.06671	252.003	32.0418	253.936	8.2492
	EC1601a_Spot 83	61.5549	93141.8	1.95266	18.6576	1.42917	0.305004	2.26942	0.0412904	1.76288	0.776798	260.826	4.50629	270.301	5.38571	354.167	32.2617	260.826	4.50629
	EC1601a_Spot 72	299.057	1797.81	10.8279	6.99788	11.204	0.822677	11.3691	0.0417718	1.93066	0.169817	263.806	4.9904	609.541	52.1504	2262.64	193.939	263.806	4.9904
	EC1601b_Spot 98	186.658	109517	10.994	18.4767	1.31294	0.320727	3.91049	0.0429981	3.68349	0.941952	271.39	9.78913	282.462	9.64267	376.113	29.5288	271.39	9.78913
	EC1601a_Spot 14	258.697	100894	2.29412	18.9571	0.957331	0.340958	1.38773	0.0468987	1.00464	0.723948	295.453	2.90125	297.897	3.58279	318.06	21.7821	295.453	2.90125
	EC1601b_Spot 56	167.53	35902.6	11.0514	10.6058	7.63099	0.711748	9.82638	0.0547717	6.19077	0.630016	343.751	20.7235	545.783	41.5099	1513.88	144.223	343.751	20.7235
	EC1601a_Spot 66	162.782	91026	11.0948	15.1312	0.916346	0.565643	1.91936	0.0621016	1.68649	0.878673	388.394	6.3568	455.193	7.04113	809.165	19.1837	388.394	6.3568
	EC1601b_Spot 91	38.7752	47825.6	2.67385	17.9536	2.0652	0.522126	4.45635	0.0680165	3.94893	0.886134	424.194	16.2119	426.571	15.5227	440.378	45.9525	424.194	16.2119
	EC1601a_Spot 81	124.579	133531	1.96182	17.5786	0.773034	0.562421	1.49307	0.0717352	1.27738	0.855534	446.602	5.51166	453.101	5.45732	487.179	17.0823	446.602	5.51166
	EC1601b_Spot 34	166.616	3.31199e+06	2.05823	17.5494	1.15012	0.575883	3.79997	0.0733305	3.62174	0.953097	456.19	15.951	461.812	14.101	490.815	25.3486	456.19	15.951
	EC1601a_Spot 98	30.8531	44576.2	2.91048	17.1952	1.30679	0.60636	2.33968	0.0756528	1.94072	0.829482	470.122	8.79902	481.262	8.96778	535.659	28.6028	470.122	8.79902
	EC1601b_Spot 94	225.829	363352	2.8262	17.4309	1.24912	0.599882	3.60262	0.0758706	3.37914	0.937966	471.427	15.3617	477.159	13.7168	505.782	27.4905	471.427	15.3617
	EC1601a_Spot 71	233.064	464452	5.95149	17.2864	0.620501	0.690057	1.03068	0.0865522	0.822968	0.798472	535.114	4.22599	532.835	4.27306	524.019	13.6116	535.114	4.22599
	EC1601a_Spot 50	93.7701	50463.5	1.13996	17.1309	0.858693	0.703608	1.22801	0.087458	0.877866	0.71487	540.486	4.55128	540.943	5.14986	543.845	18.7693	540.486	4.55128
	EC1601b_Spot 112	211.457	231041	13.3451	17.1675	1.29453	0.723563	3.45863	0.0901302	3.20722	0.927311	556.307	17.0939	552.768	14.7439	539.147	28.325	556.307	17.0939
	EC1601a_Spot 9	827.992	817094	6.37495	16.5567	0.740055	0.769273	1.26014	0.0924148	1.01994	0.809385	569.803	5.56222	579.346	5.5634	617.86	15.9958	569.803	5.56222
	EC1601b_Spot 80	79.8408	76220.5	1.67551	16.2426	1.32134	0.828249	3.95162	0.097612	3.72415	0.942438	600.399	21.3502	612.64	18.1793	659.109	28.3185	600.399	21.3502
	EC1601b_Spot 110	64.0363	24856.8	1.97488	16.4133	1.59277	0.844449	4.29203	0.100568	3.98555	0.928593	617.735	23.4774	621.598	19.9551	636.643	34.277	617.735	23.4774
	EC1601a_Spot 96	94.5891	37295.8	3.93922	16.6601	0.829697	0.840326	1.275	0.101581	0.968102	0.759297	623.667	5.75487	619.326	5.91149	604.413	17.9299	623.667	5.75487
	EC1601b_Spot 38	243.992	57237.9	4.13183	15.4839	1.20204	0.94706	4.08683	0.106401	3.90605	0.955767	651.814	24.2155	676.571	20.187	760.762	25.3266	651.814	24.2155
	EC1601b_Spot 33	66.3251	115269	2.36647	15.4649	1.35768	1.05823	3.26992	0.118745	2.97474	0.909729	723.338	20.3542	732.952	17.0724	763.355	28.5969	723.338	20.3542
	EC1601b_Spot 12	213.364	142177	4.44926	13.8834	1.0078	1.55574	3.57952	0.156718	3.43472	0.959548	938.514	29.9989	952.776	22.1281	986.768	20.4963	986.768	20.4963
	EC1601b_Spot 43	69.0987	106298	2.60864	13.8777	1.52753	1.71185	3.86392	0.172374	3.54916	0.918538	1025.18	33.6398	1012.98	24.771	987.577	31.0823	987.577	31.0823
	EC1601a_Spot 4	22.3511	16757.1	3.10303	13.8031	0.991545	1.6913	1.39548	0.169389	0.981938	0.703656	1008.74	9.16914	1005.25	8.90477	998.515	20.1394	998.515	20.1394
	EC1601a_Spot 7	212.483	176920	10.5156	13.7234	0.572228	1.62155	1.09713	0.161466	0.93608	0.853209	964.917	8.38891	978.593	6.89075	1010.27	11.6029	1010.27	11.6029
	EC1601b_Spot 58	31.8368	34833.5	3.74346	13.7002	1.10246	1.71777	3.73996	0.170757	3.57378	0.955566	1016.28	33.6017	1015.19	24.0066	1013.71	22.3351	1013.71	22.3351
	EC1601a_Spot 78	147.756	1.31925e+06	2.27293	13.0913	0.689583	1.92187	1.1598	0.182556	0.93253	0.804044	1080.92	9.28016	1088.72	7.74613	1105.23	13.8034	1105.23	13.8034
	EC1601a_Spot 3	55.9666	89259	0.715383	12.4929	0.66899	2.27347	1.37102	0.206082	1.19672	0.872871	1207.91	13.1818	1204.09	9.66869	1198.11	13.1739	1198.11	13.1739
	EC1601b_Spot 59	206.773	175711	4.69543	12.4879	1.0339	2.27295	3.43797	0.205953	3.27883	0.95371	1207.22	36.0977	1203.93	24.2474	1198.87	20.3857	1198.87	20.3857
	EC1601b_Spot 27	108.007	54168.3	2.39646	12.2903	1.07264	2.40424	4.00003	0.214402	3.85353	0.963375	1252.23	43.8581	1243.87	28.6924	1230.3	21.0523	1230.3	21.0523
	EC1601b_Spot 25	53.5092	72406.1	1.9868	12.237	1.32331	2.38342	3.41575	0.211623	3.149	0.921906	1237.46	35.4561	1237.64	24.4368	1238.81	25.9517	1238.81	25.9517
	EC1601b_Spot 82	196.508	1.733e+06	32.7424	12.1803	1.16038	2.35498	3.4621	0.208129	3.26185	0.942159	1218.84	36.2249	1229.07	24.6804	1247.88	22.7186	1247.88	22.7186
	EC1601b_Spot 6	145.82	810373	2.39797	11.7663	1.34426	2.65396	3.51781	0.226581	3.25084	0.924109	1316.56	38.7121	1315.75	25.9494	1315.25	26.069	1315.25	26.069
	EC1601a_Spot 31	97.7412	133791	3.88849	11.7227	0.813797	2.67091	1.54845	0.227181	1.31736	0.850759	1319.71	15.7212	1320.44	11.4401	1322.46	15.765	1322.46	15.765
	EC1601b_Spot 83	33.4982	75976.1	2.90818	11.4326	1.24922	2.83482	3.22004	0.235157	2.96784	0.92168	1361.47	36.425	1364.8	24.1743	1370.84	24.0382	1370.84	24.0382
	EC1601b_Spot 92	109.287	203506	1.92745	11.2385	1.05031	2.86883	3.11794	0.233938	2.93571	0.941555	1355.1	35.8792	1373.76	23.4801	1403.71	20.1188	1403.71	20.1188
	EC1601b_Spot 99	61.9222	188033	3.21907	11.0499	1.16208	2.96273	3.67069	0.237541	3.48189	0.948565	1373.9	43.0842	1398.12	27.873	1436.06	22.1626	1436.06	22.1626
	EC1601a_Spot 8	44.1544	73491.4	1.12305	10.8948	0.811547	3.25115	1.35531	0.257007	1.08547	0.800905	1474.51	14.3069	1469.45	10.5248	1462.96	15.4211	1462.96	15.4211
	EC1601a_Spot 29	11.402	16376.8	1.21342	10.8125	1.07951	3.34096	1.5414	0.26211	1.10027	0.713807	1500.63	14.73	1490.68	12.0463	1477.36	20.4735	1477.36	20.4735
	EC1601b_Spot 54	161.73	415776	4.30762	10.6612	1.32798	3.16358	3.80142	0.244722	3.56191	0.936996	1411.2	45.145	1448.32	29.3365	1504.03	25.0952	1504.03	25.0952
	EC1601b_Spot 16	100.314	142555	3.70211	10.5869	1.06221	3.4597	2.75403	0.265764	2.54094	0.922627	1519.27	34.3922	1518.08	21.6969	1517.23	20.0371	1517.23	20.0371
	EC1601b_Spot 21	45.9846	251229	1.31129	10.5549	1.42997	3.47448	2.90148	0.266091	2.52463	0.870118	1520.93	34.2047	1521.44	22.8807	1522.95	26.9551	1522.95	26.9551
	EC1601a_Spot 100	78.4102	266522	3.40984	10.4907	0.785945	3.58349	1.25804	0.272771	0.982325	0.780836	1554.85	13.5713	1545.88	9.98733	1534.44	14.7929	1534.44	14.7929
	EC1601a_Spot 80	15.3438	37787.1	1.6186	10.4269	0.773764	3.5255	1.33041	0.266724	1.08225	0.813475	1524.15	14.6902	1532.95	10.5241	1545.92	14.5416	1545.92	14.5416
	EC1601a_Spot 51	72.5734	177169	2.68557	10.3935	0.788819	3.55253	1.0888	0.267908	0.750498	0.68929	1530.17	10.2227	1539	8.62726	1551.94	14.8128	1551.94	14.8128
	EC1601a_Spot 97	144.162	1.83665e+06	2.38938	10.3216	0.769726	3.55893	1.31815	0.266536	1.07007	0.811795	1523.19	14.5167	1540.43	10.4488	1564.96	14.4279	1564.96	14.4279
	EC1601b_Spot 1	259.914	292225	3.89231	10.3214	1.18639	3.67331	2.64481	0.275096	2.36379	0.893747	1566.62	32.8755	1565.59	21.1115	1564.99	22.2392	1564.99	22.2392
	EC1601b_Spot 104	94.6383	95250.4	5.08837	10.2424	1.00024	3.66455	3.27947	0.272338	3.12321	0.952352	1552.66	43.0955	1563.68	26.1662	1579.39	18.7141	1579.39	18.7141
	EC1601a_Spot 86	174.058	379955	2.94072	10.1203	0.635517	3.87389	1.13699	0.284465	0.942802	0.829205	1613.81	13.46	1608.26	9.17639	1601.79	11.8565	1601.79	11.8565
	EC1601a_Spot 34	180.856	98579.9	1.00744	9.79206	0.422832	3.77179	1.16324	0.267984	1.08367	0.931596	1530.56	14.7642	1586.76	9.33633	1663.05	7.82485	1663.05	7.82485
	EC1601b_Spot 64	62.6095	87258.2	2.0872	9.55588	1.17478	4.31806	2.94639	0.299396	2.70206	0.917074	1688.31	40.135	1696.81	24.2962	1708.11	21.6199	1708.11	21.6199
	EC1601a_Spot 18	367.198	64658.4	2.07141	9.54461	0.557501	4.09684	0.965461	0.283723	0.78823	0.816429	1610.09	11.2304	1653.67	7.87991	1710.28	10.256	1710.28	10.256
	EC1601a_Spot 94	89.8291	92830.9	5.05436	9.4518	0.504927	4.58006	1.06647	0.314104	0.93936	0.880816	1760.87	14.4742	1745.65	8.88833	1728.24	9.26936	1728.24	9.26936
	EC1601b_Spot 88	28.8541	70708.6	1.28655	9.40791	1.08616	4.4408	3.16879	0.30314	2.97683	0.93942	1706.86	44.6407	1719.98	26.2675	1736.78	19.9169	1736.78	19.9169
	EC1601b_Spot 22	134.392	1.44508e+06	2.39471	9.28106	1.22038	4.65466	3.77712	0.313454	3.57454	0.946366	1757.68	54.993	1759.13	31.58	1761.63	22.3075	1761.63	22.3075
	EC1601a_Spot 82	98.2469	204727	1.48676	9.08312	0.648347	4.84138	1.31158	0.319075	1.14012	0.869276	1785.21	17.7784	1792.12	11.0381	1800.95	11.7954	1800.95	11.7954
	EC1601b_Spot 100	24.8382	131196	0.846257	8.96582	1.23802	4.89355	2.54628	0.318348	2.22505	0.873844	1781.65	34.6365	1801.15	21.4707	1824.56	22.4572	1824.56	22.4572
	EC1601b_Spot 76	62.4782	66064.3	1.04196	8.94945	1.40581	4.91291	3.90465	0.319024	3.6428	0.932939	1784.96	56.7983	1804.48	32.9536	1827.87	25.4911	1827.87	25.4911
	EC1601a_Spot 38	164.899	3.08369e+06	8.96016	8.79728	0.546085	5.05815	1.34871	0.32287	1.23321	0.914363	1803.73	19.4029	1829.11	11.4345	1858.91	9.86322	1858.91	9.86322
	EC1601a_Spot 13	64.5929	102171	1.37961	8.63322	0.752147	5.5874	1.13224	0.350002	0.84631	0.747466	1934.61	14.1444	1914.16	9.75163	1892.84	13.5305	1892.84	13.5305
	EC1601b_Spot 79	179.674	354620	1.78413	8.35784	1.03736	5.29534	2.99264	0.321126	2.80709	0.937999	1795.23	43.9859	1868.11	25.5653	1950.96	18.5339	1950.96	18.5339
	EC1601a_Spot 74	78.4403	475226	1.25722	8.33112	0.653116	5.44375	1.31154	0.329071	1.13736	0.867191	1833.87	18.1533	1891.77	11.2509	1956.68	11.66	1956.68	11.66
	EC1601a_Spot 46	232.558	441540	4.63121	8.24541	0.664816	5.68898	1.17702	0.340356	0.971284	0.825207	1888.38	15.8993	1929.7	10.1649	1975.12	11.8435	1975.12	11.8435
	EC1601b_Spot 48	81.3428	320642	1.3053	8.14297	1.08072	6.24541	3.22526	0.369004	3.03881	0.94219	2024.71	52.8029	2010.83	28.2361	1997.36	19.2044	1997.36	19.2044
	EC1601a_Spot 48	115.61	1.31208e+06	1.07348	5.60484	0.712212	12.2151	1.41344	0.496764	1.22089	0.863771	2599.87	26.1212	2621.07	13.2666	2638.2	11.8267	2638.2	11.8267
	EC1601b_Spot 89	74.5833	311711	2.97936	5.47881	0.975655	13.1673	3.51336	0.523446	3.37517	0.960668	2713.78	74.7615	2691.72	33.1678	2675.9	16.1448	2675.9	16.1448
	EC1601b_Spot 37	247.595	259101	7.12088	5.46244	1.12386	12.3128	3.29378	0.488013	3.09612	0.939989	2562.07	65.4599	2628.55	30.9419	2680.85	18.5893	2680.85	18.5893
