# Supplementary material
Source: publisher figshare collection journal article supplement (https://gsapubs.figshare.com/ndownloader/files/22411821)
Supplement: Supplementary file 1 [file 22411821 › Supplemental Material 2.xlsx]

## Sheet: Table S2
Supplimental Table 2: Sample information for modern river sand samples of Ecuador
			Lat	Lat	Upstream catchment area	Reference
ID	Sample number	River name	(°N)	(°W)	(km2)
Forearc-Western Cordillera
1	EC1610	Rio Toachi	-0.24429	-79.1376	2379	This study
2	EC16LR3	Rio Quevedo	-1.01925	-79.464	3555	This study
3	EC1505	Rio Pilalo	-0.86718	-79.1143	251	This study
4	EC1509	Rio Chambo	-1.06168	-78.6069	2016	This study
5	EC1608	Rio Canar	-2.77736	-79.2409	197	This study
6	EC1550	Rio Jubones	-3.34936	-79.3813	2681	This study
I	RBLAEC01	Rio Blanco	0.324251	-79.4718	6264	Pepper et al. (2016)
II	RCHOTE	Rio Chota	0.474147	-78.0624	1849	Pepper et al. (2016)
III	RJUBEC01	Rio Jubones	-3.25879	-79.8708	4341	Pepper et al. (2016)
Eastern Cordillera
7	EC1635	Rio Mataqui	0.36918	-77.9273	341	This study
8	EC1580	Rio Quijos	-0.38232	-77.817	1686	This study
9	EC1510	Rio Pastaza	-1.39276	-78.4082	7879	This study
10	EC1513	Rio Pastaza	-1.39833	-78.3444	8371	This study
11	EC1535	Rio Paute	-2.71512	-78.3245	5681	This study
12	EC1572	Rio Zamora	-3.76465	-78.6417	5592	This study
SubAndean Zone
IV	RTENEC01	Rio Napo	-1.0438	-77.7966	4069	Pepper et al. (2016)
13	EC1602	Rio Napo	-1.03586	-77.6659	5878	This study
14	EC15191606	Rio Pastaza	-1.45234	-78.1537	9252	This study
15	EC1601	Rio Pastaza	-1.91462	-77.8261	13473	This study
