# Supplementary material
Source: publisher figshare collection journal article supplement (https://gsapubs.figshare.com/ndownloader/files/22411821)
Supplement: Supplementary file 1 [file 22411821 › Supplemental Material 3.pdf]

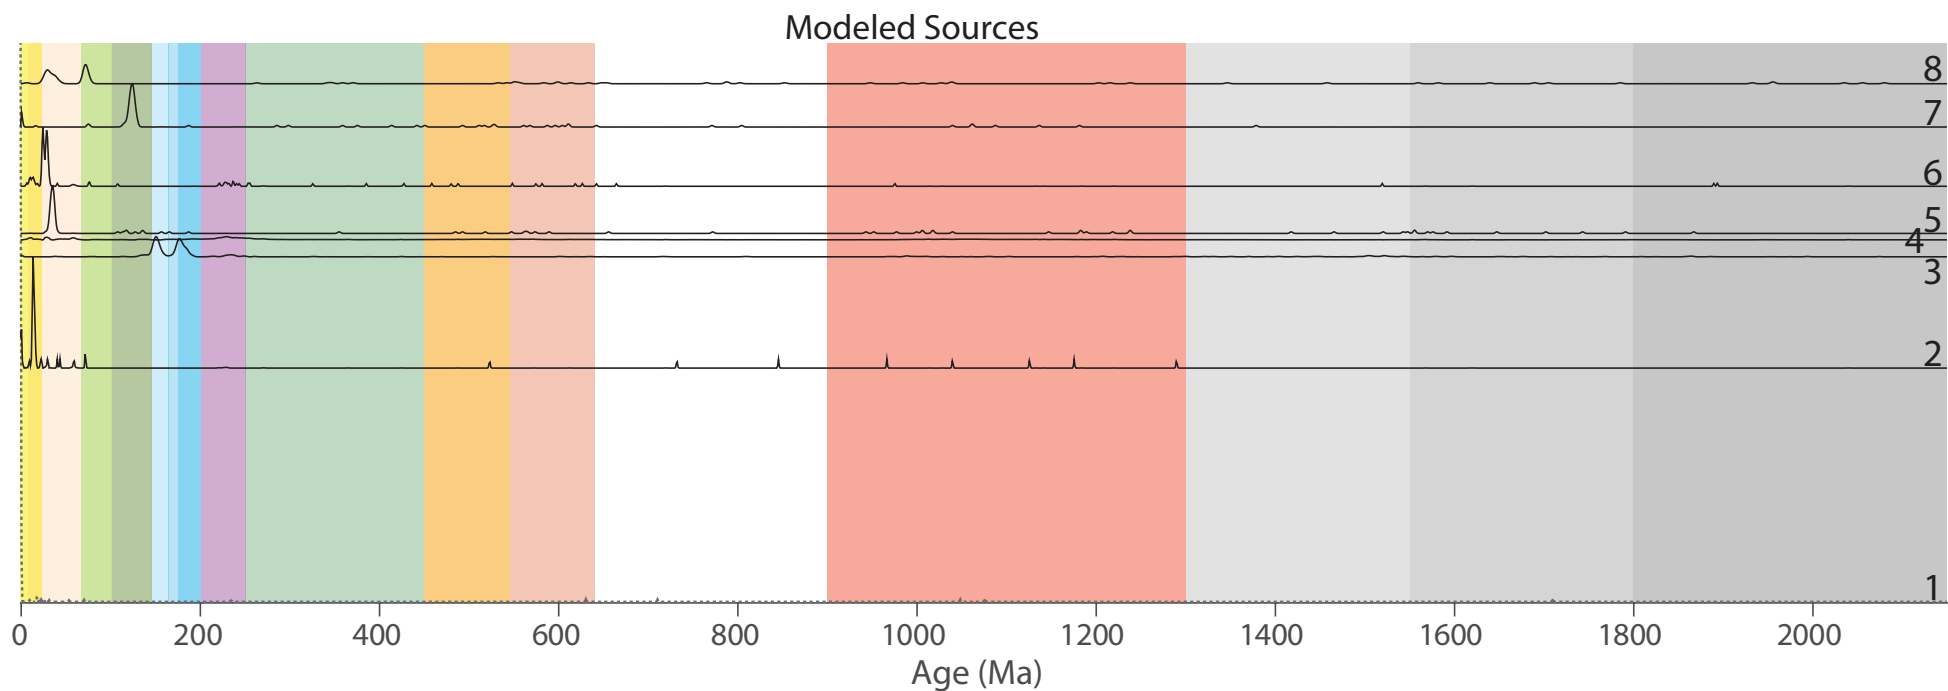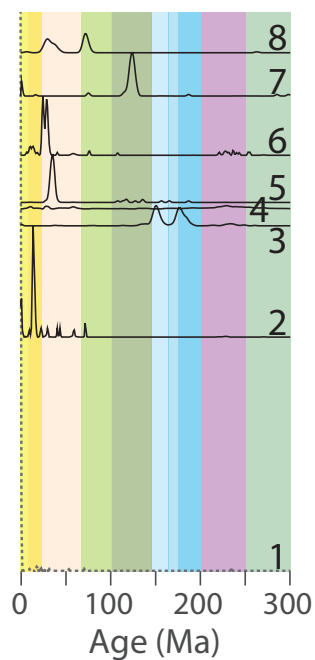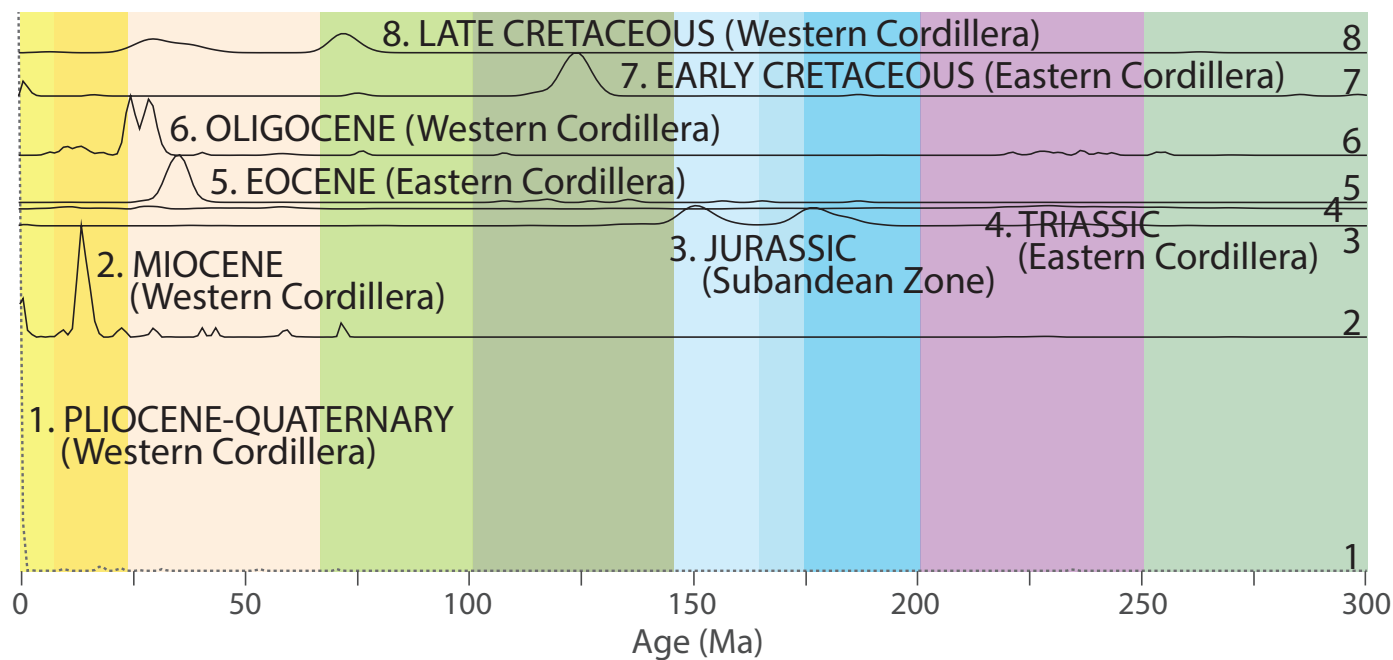

Supplemental Figure 1. Plots of the 8 modeled age distributions (labeled 1-8) generated using the non-negative matrix factorization (NMF) approach of Saylor et al. (2019). All three plots show the same NMF results. Diagnostic age populations are identified in the expanded 0-300 Ma plot.
