# Supplementary material
Source: publisher figshare collection journal article supplement (https://gsapubs.figshare.com/ndownloader/files/22411821)
Supplement: Supplementary file 1 [file 22411821 › Supplemental Material 4.xlsx]

## Sheet: Table S3
Supplimental Table 3: Grain size measurements for modern river sand samples of the Pastaza River, Ecuador
ID	Sample number	River name	Short axis length	1σ	Long axis length	1σ
			μm	μm	μm	μm
Western Cordillera
4	EC1509	Rio Chambo	95.8814	28.4257	175.364	60.0025
Eastern Cordillera
9	EC1510	Rio Pastaza	66.8857	17.6397	104.048	33.1748
10	EC1513	Rio Pastaza	95.1319	25.6152	157.835	45.2328
SubAndean Zone
14	EC15191606	Rio Pastaza	82.0345	27.3989	121.076	44.025
15	EC1601	Rio Pastaza	81.2353	26.2381	121.563	39.0123
